# Supplementary material for: Complementary Feeding Caregivers’ Practices and Growth, Risk of Overweight/Obesity, and Other Non-Communicable Diseases: A Systematic Review and Meta-Analysis
Source: MDPI journal article supplement (doi:10.3390/nu14132646), 2022-06-26
Supplement: s1 [file s1]

## **File S1. LITERATURE SEARCH AND SCREENING RESULTS**

### **BLW/BLISS and growth**

### **Key questions**

- A. Can the BLW/BLISS method during CF influence, either positively or negatively, infant weight-length gain?*

### **PICOs**

- P.** In a healthy child in the second half of life
- I.** Baby-Led Weaning method
- C.** Compared to other feeding models
- O.** does it involve a different physical growth in later ages?

### **KEYWORDS**

#### **Population**

- A. No age limit
- B. ([infant]/lim OR [child]/lim OR [preschool]/lim

#### **Exposure Factors / Comparison**

"self-weaning"[All Fields]  
"self weaning"[All Fields]  
"baby led weaning"[All Fields]  
"baby-led weaning"[All Fields]))  
"Infant Nutritional Physiological Phenomena" [MeSH]  
"Weaning"[MeSH])

#### **Outcomes**

"Growth and Development"[Mesh]  
"Growth"[Mesh])  
"Growth Charts"[Mesh])  
"Body Height"[Mesh])  
"Body Weight"[Mesh])  
"Body-Weight Trajectory"[Mesh])  
"Body Weight Changes"[Mesh]

### **Guidelines search**

## PubMed

#1

("Growth and Development"[Mesh] OR "Growth"[Mesh]) OR "Growth Charts"[Mesh] AND ((Practice Guideline[ptyp] OR Guideline[ptyp]) AND "2014/08/11"[PDat] : "2021/09/15"[PDat] AND "humans"[MeSH Terms])

## EMBASE

#1

('growth'/exp OR 'growth, development and aging'/exp) AND ('baby led weaning'/exp OR 'baby led weaning' OR 'baby led' OR 'self weaning' OR autoweaning AND ([adolescent]/lim OR [child]/lim OR [infant]/lim OR [preschool]/lim OR [school]/lim OR [young adult]/lim) AND [2014-2021]/py AND 'practice guideline'/de

## UPTODATE <https://www.uptodate.com/home>

Society Guideline Links: *Breastfeeding and infant nutrition*

## SOCIETY GUIDELINE LINKS:

National Guideline Clearinghouse (NGC) <https://www.ahrq.gov/gam/index.html>

Canadians Medical Association (CMA) <https://www.cma.ca/clinicalresources/practiceguidelines>

National Guideline Centre (NGC) - National Institute of Health and Care Excellence (NICE) <https://www.rcplondon.ac.uk/about-us/what-we-do/national-guideline-centre-ngc>

Scottish Intercollegiate Guidelines Network (SIGN) <https://www.sign.ac.uk/our-guidelines.html>

Australian Clinical Practice Guidelines (ACPG) <https://www.clinicalguidelines.gov.au/>

New Zealand Guidelines Group (NZGG) <https://www.health.govt.nz/about-ministry/ministry-health-websites/new-zealand-guidelines-group>

American Academy of Pediatrics (AAP) <https://www.aap.org/en-us/Pages/Default.aspx>

EPA/UNEPSA <http://www.epa-unepsa.org/>

Guidelines International Network <https://g-i-n.net/>

Società Italiana di Pediatria (SIP) <http://www-sip.it/>

Società Italiana di Pediatria Preventiva e Sociale (SIPPS) <https://www.sipps.it/>

Società Italiana di Endocrinologia e Diabetologia Pediatrica (SIEDP) <http://www.siedp.it/pagina/84/linee+guida%2C+raccomandazioni+e+consensus>

## Systematic Reviews search

## COCHRANE LIBRARY

- A. Growth
- B. “Child Health/Develop-learn problems” in Title Abstract Keyword
- C. “Endocrine & Metabolic” in Title Abstract Keyword
- C. “Weaning”
- D. “Complementary feeding”
- E. “Baby Led Weaning”

Custom date range Topics: 01.01.2014 - 15.09.2021

## PubMed

#1

("self-weaning"[All Fields] OR "self weaning"[All Fields] OR "baby led weaning"[All Fields] OR "baby-led weaning"[All Fields]) AND (((("Growth and Development"[Mesh] OR "Growth"[Mesh]) OR "Growth Charts"[Mesh]) OR "Body Weight Changes"[Mesh]) OR "Body Height"[Mesh]) OR "Body Weight"[Mesh]) OR "Body-Weight Trajectory"[Mesh]) AND ((Meta-Analysis[ptyp] OR systematic[sb]) AND ("2014/08/13"[PDat] : "2021/09/15"[PDat]))

## EMBASE

#1

'baby led weaning'/exp OR 'baby led weaning' OR 'baby led' OR 'self weaning' OR autoweaning AND ('growth'/exp OR 'growth, development and aging'/exp OR 'body weight'/exp OR 'body mass'/exp) AND [2014-2021]/py AND ([cochrane review]/lim OR [systematic review]/lim OR [meta analysis]/lim)

## Studies search (subsequent to SR of D’Auria et al - 03/2018)

### Cochrane . 15. 9.2021

'baby led weaning'/exp OR 'baby led weaning' OR 'baby led' OR 'self weaning' OR autoweaning in Title Abstract Keyword

## PubMed

#1

("self-weaning"[All Fields] OR "self weaning"[All Fields] OR "baby led weaning"[All Fields] OR "baby-led weaning"[All Fields]) AND (((("Growth and Development"[Mesh]) OR "Growth"[Mesh]) OR "Growth Charts"[Mesh]) OR "Body Height"[Mesh]) OR "Body-Weight Trajectory"[Mesh]) OR "Body Weight Changes"[Mesh]) AND (Clinical Trial[ptyp] OR Comparative Study[ptyp] OR Multicenter Study[ptyp] OR Observational Study[ptyp] OR Pragmatic Clinical Trial[ptyp] OR Randomized Controlled Trial[ptyp]) AND ("2018/03/01"[PDAT]:"2021/09/15"[PDAT]))

## EMBASE

#1

'baby led weaning'/exp OR 'baby led weaning' OR 'baby led' OR 'self weaning' OR autoweaning  
AND ('growth'/exp OR 'growth, development and aging'/exp) AND [2018-2021]/py AND ('case  
control study'/de OR 'clinical trial'/de OR 'cohort analysis'/de OR 'comparative effectiveness'/de OR  
'comparative study'/de OR 'controlled clinical trial'/de OR 'controlled study'/de OR 'cross-sectional  
study'/de OR 'double blind procedure'/de OR 'human'/de OR 'longitudinal study'/de OR 'multicenter  
study'/de OR 'observational study'/de OR 'prospective study'/de OR 'randomized controlled trial'/de  
OR 'retrospective study'/de) AND ([child]/lim OR [infant]/lim OR [preschool]/lim)

**Figure S1a: Guidelines search flow diagram**

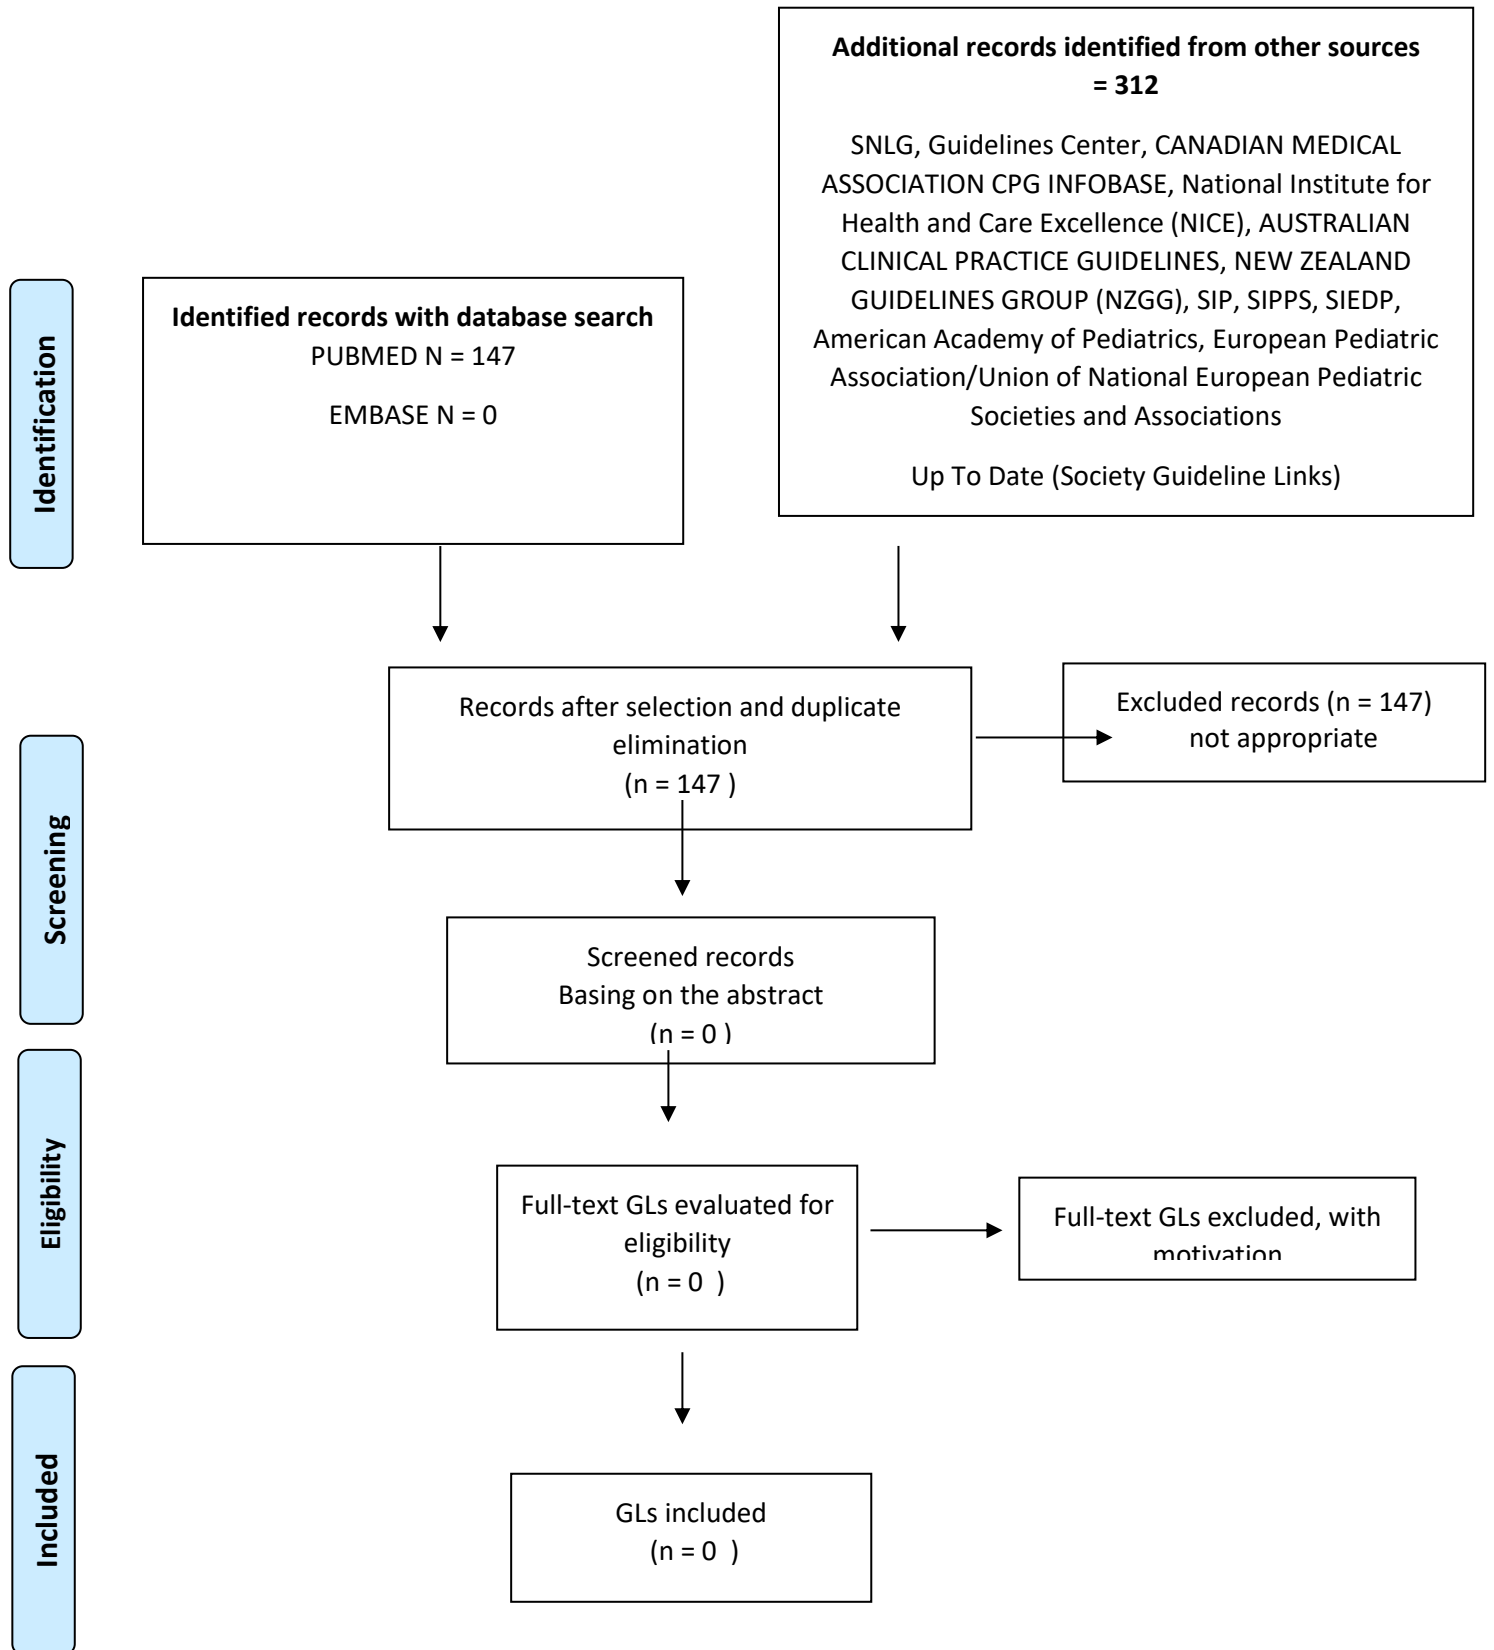

**Figure S1b: SRs search flow diagram**

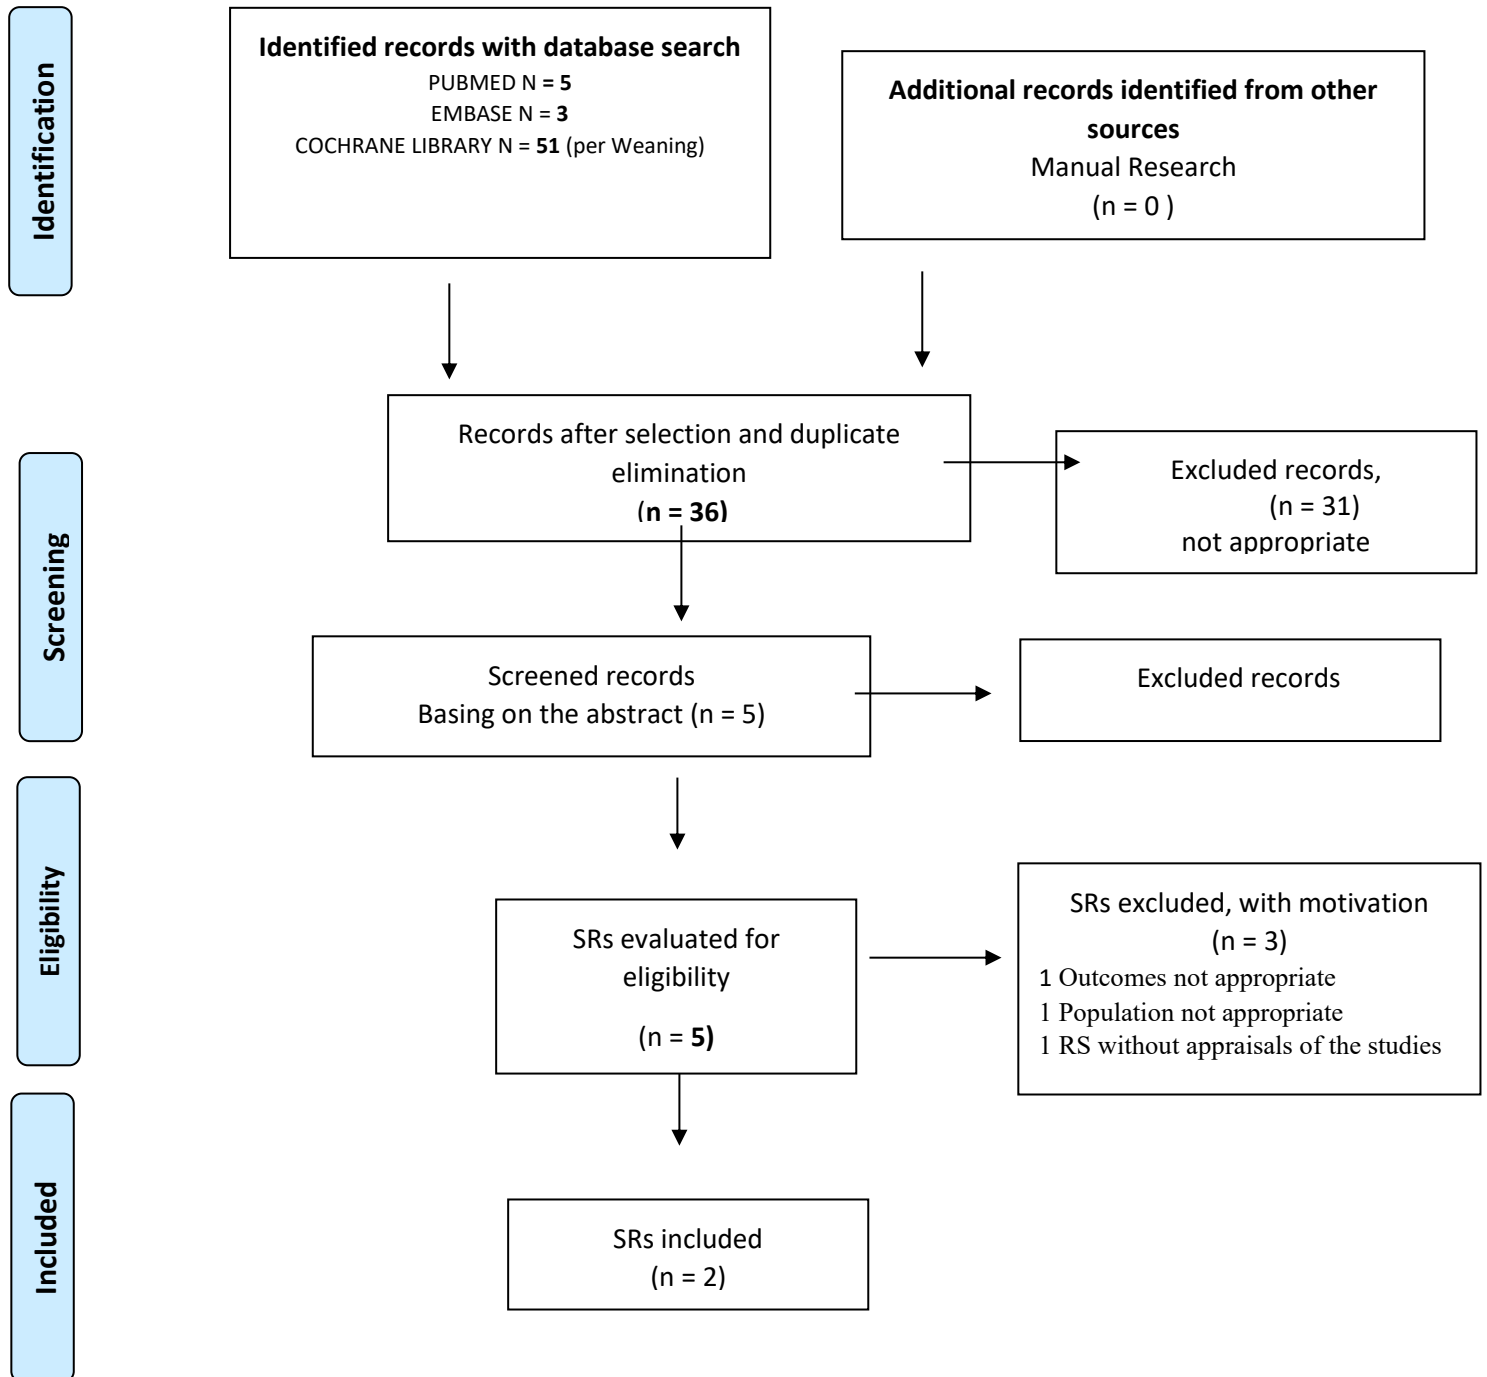

**Figure S1c: Studies search flow diagram.**

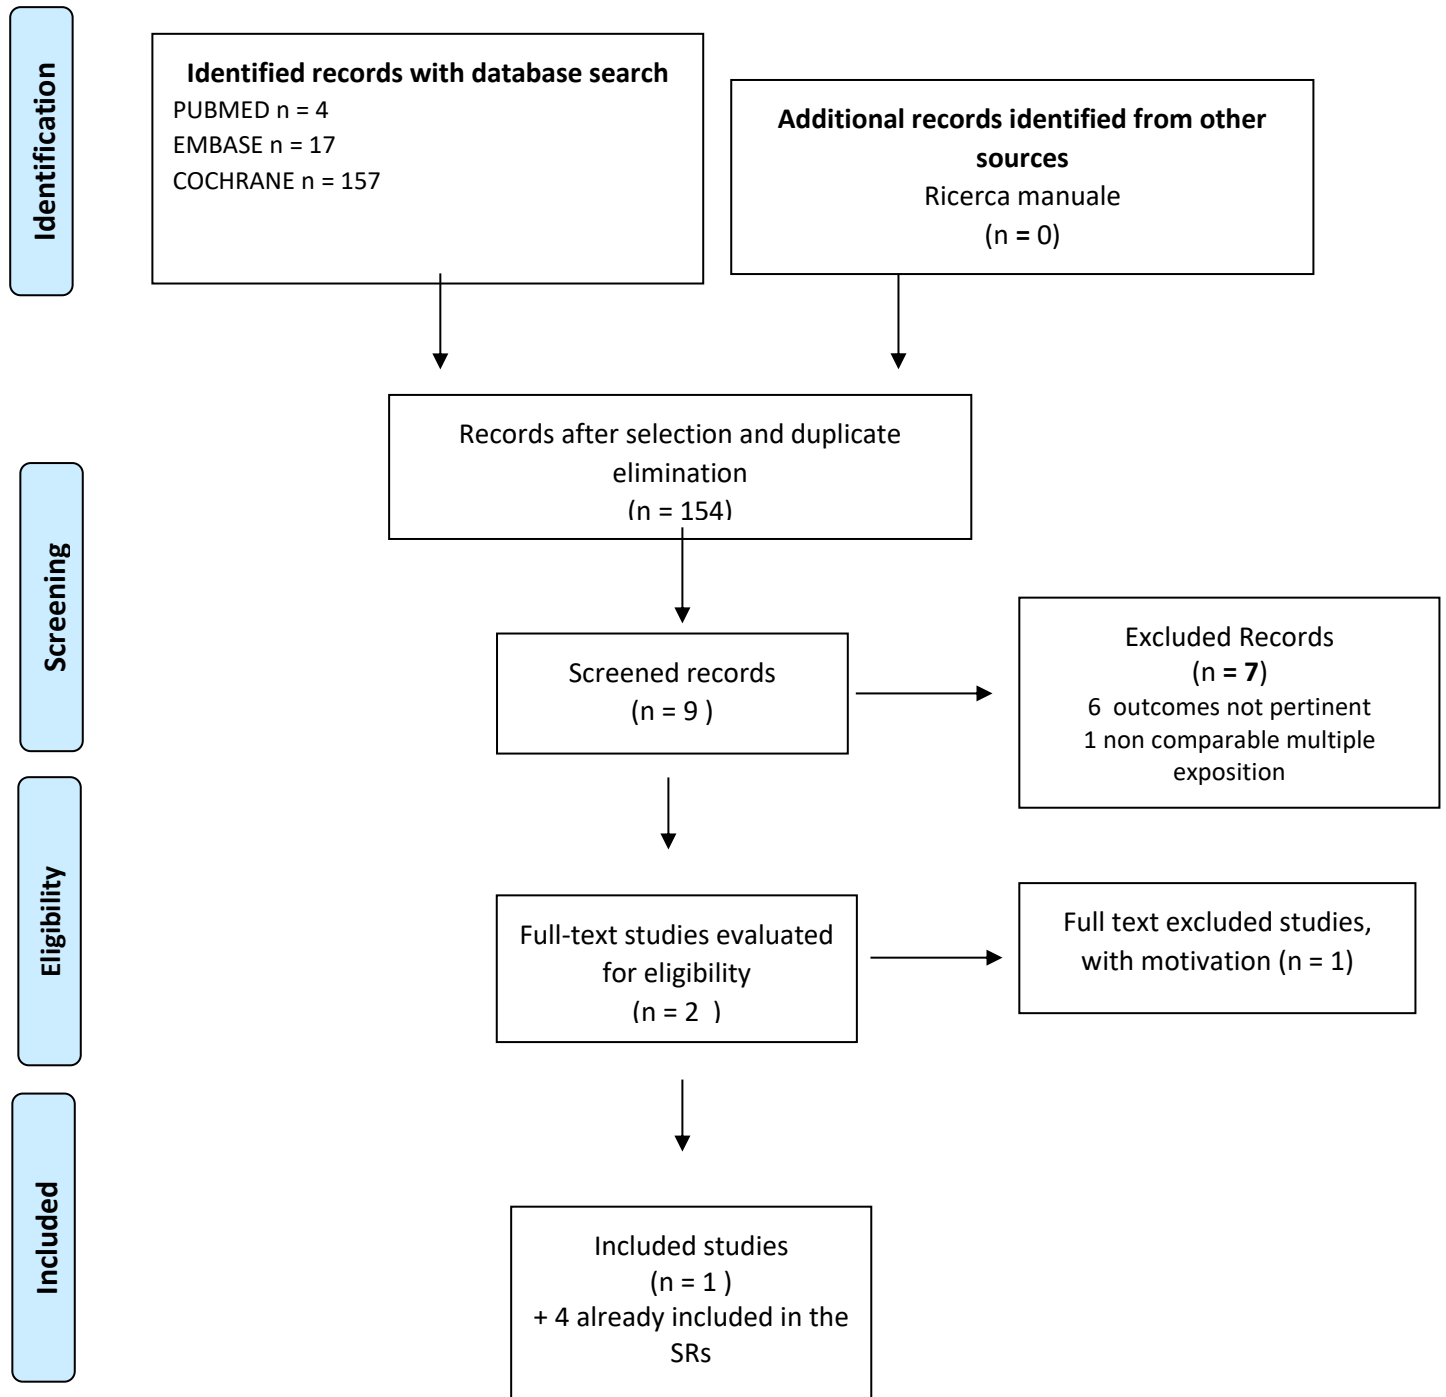

## **BLW/BLISS and risk of overweight/obesity**

***B. Can the BLW/BLISS method during CF influence, either positively or negatively, the development of overweight/obesity?***

### **PICOs**

- P.** A healthy children in the second semester of life
- I.** the Baby-Led Weaning (or the BLISS method)
- C.** compared to other models of feeding
- O.** does it involve a different risk of overweight/obesity in later ages?

### **KEY WORDS**

#### **Population**

- F. No age limit
- G. ([infant]/lim OR [child]/lim OR [preschool]/lim

#### **Exposure Factors / Comparison**

- "self-weaning"[All Fields]
- "self weaning"[All Fields]
- "baby led weaning"[All Fields]
- "baby-led weaning"

#### **Outcomes**

- "Body Height"[Mesh])
- "Body Weight"[Mesh])
- "Body-Weight Trajectory"[Mesh])
- "Body Weight Changes"[Mesh]
- "Body Composition"[Mesh])
- "Nutritional Status"[Mesh]
- ("Obesity"[Mesh]
- "Pediatric Obesity"[Mesh])
- "Overweight"[Mesh]

### **Guidelines search**

#### **SOCIETY GUIDELINE LINKS:**

National Guideline Clearinghouse (NGC) <https://www.ahrq.gov/gam/index.html>



Canadians Medical Association (CMA) <https://www.cma.ca/clinicalresources/practiceguidelines>

National Guideline Centre (NGC) - National Institute of Health and Care Excellence (NICE)  
<https://www.rcplondon.ac.uk/about-us/what-we-do/national-guideline-centre-ngc>

Scottish Intercollegiate Guidelines Network (SIGN) <https://www.sign.ac.uk/our-guidelines.html>

Australian Clinical Practice Guidelines (ACPG) <https://www.clinicalguidelines.gov.au/>

New Zealand Guidelines Group (NZGG) <https://www.health.govt.nz/about-ministry/ministry-health-websites/new-zealand-guidelines-group>

American Academy of Pediatrics (AAP) <https://www.aap.org/en-us/Pages/Default.aspx>

EPA/UNEPSA <http://www.epa-une psa.org/>

Guidelines International Network <https://g-i-n.net/>

European Childhood Obesity Group <https://www.ecog-obesity.eu/>

Società Italiana di Pediatria (SIP) <http://www-sip.it/>

Società Italiana di Pediatria Preventiva e Sociale (SIPPS) <https://www.sipps.it/>

Società Italiana di Endocrinologia e Diabetologia Pediatrica (SIEDP)  
<http://www.siedp.it/pagina/84/linee+guida%2C+raccomandazioni+e+consensus>

## **PUBMED**

#1

("self-weaning"[All Fields] OR "self weaning"[All Fields] OR "baby led weaning"[All Fields] OR "baby-led weaning"[All Fields]) AND ((Practice Guideline[ptyp] OR Guideline[ptyp]) AND ("2014/10/02"[PDat] : "2021/09/15"[PDat]))

## **EMBASE**

#1

('baby led weaning'/exp OR 'baby led weaning' OR 'baby led' OR 'self weaning' OR autoweaning) AND ('obesity'/exp OR 'body mass'/exp OR overweight) AND [2014-2021]/py

## **Sistematic Reviews search**

### **COCHRANE LIBRARY**

“Endocrine & Metabolic” in Title Abstract Keyword

“Weaning”  
“Baby Led Weaning”  
'baby-led weaning or BLISS' in Title Abstract Keyword'  
Custom date range Topics: 01.09.2014-15.09.2021

## **PUBMED**

#1

("self-weaning"[All Fields] OR "self weaning"[All Fields] OR "baby led weaning"[All Fields] OR "baby-led weaning"[All Fields]) AND ((Meta-Analysis[ptyp] OR systematic[sb]) AND "2014/10/02"[PDat] : "2021/09/15"[PDat])

## **EMBASE**

#1

('baby led weaning'/exp OR 'baby led weaning' OR 'baby led' OR 'self weaning' OR autoweaning) AND ([systematic review]/lim OR [meta analysis]/lim) AND [2014-2021]/py

## **Primary Studies search (post-RS di D’Auria 2018)**

### **PUBMED**

#1

"self-weaning"[All Fields] OR "self weaning"[All Fields] OR "baby led weaning"[All Fields] OR "baby-led weaning"[All Fields] AND (((((((("Obesity"[Mesh] OR "Pediatric Obesity"[Mesh]) OR "Overweight"[Mesh]) OR "Body Mass Index"[Mesh]) OR "Body Weight Changes"[Mesh]) OR "Body Weight"[Mesh]) OR "Body Composition"[Mesh]) OR "Nutritional Status"[Mesh]) AND ("2018/03/01"[PDAT] : "2020/09/15"[PDAT])

### **EMBASE**

#1

('baby led weaning'/exp OR 'baby led weaning' OR 'baby led' OR 'self weaning' OR autoweaning) AND ('obesity'/exp OR 'body mass'/exp OR overweight) AND ('clinical trial'/de OR 'comparative study'/de OR 'controlled clinical trial'/de OR 'controlled study'/de OR 'cross-sectional study'/de OR 'observational study'/de OR 'prospective study'/de OR 'randomized controlled trial'/de OR 'randomized controlled trial (topic)'/de) AND [2018-2021]/py

**Figure S1d: Guidelines search flow diagram**

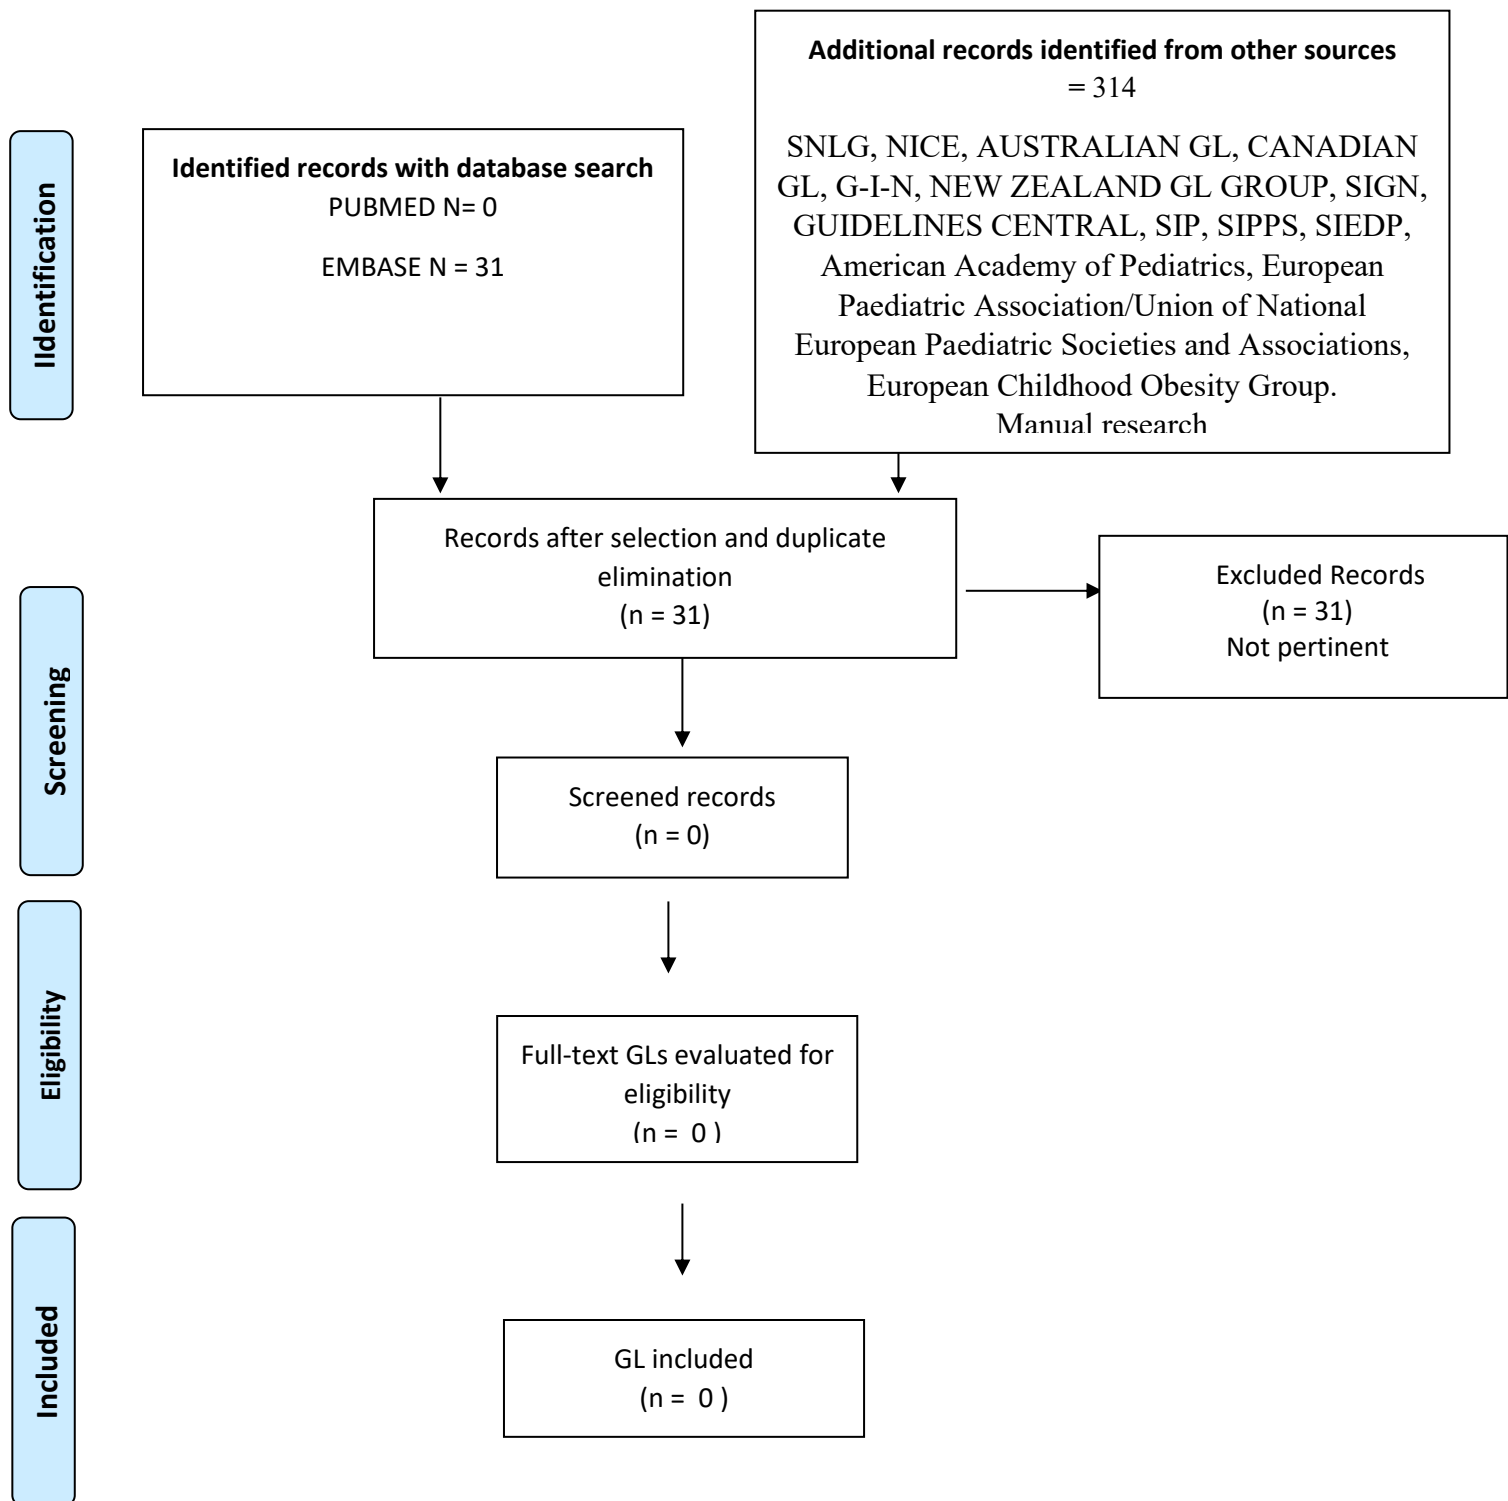

**Figure S1e: SRs search flow diagram**

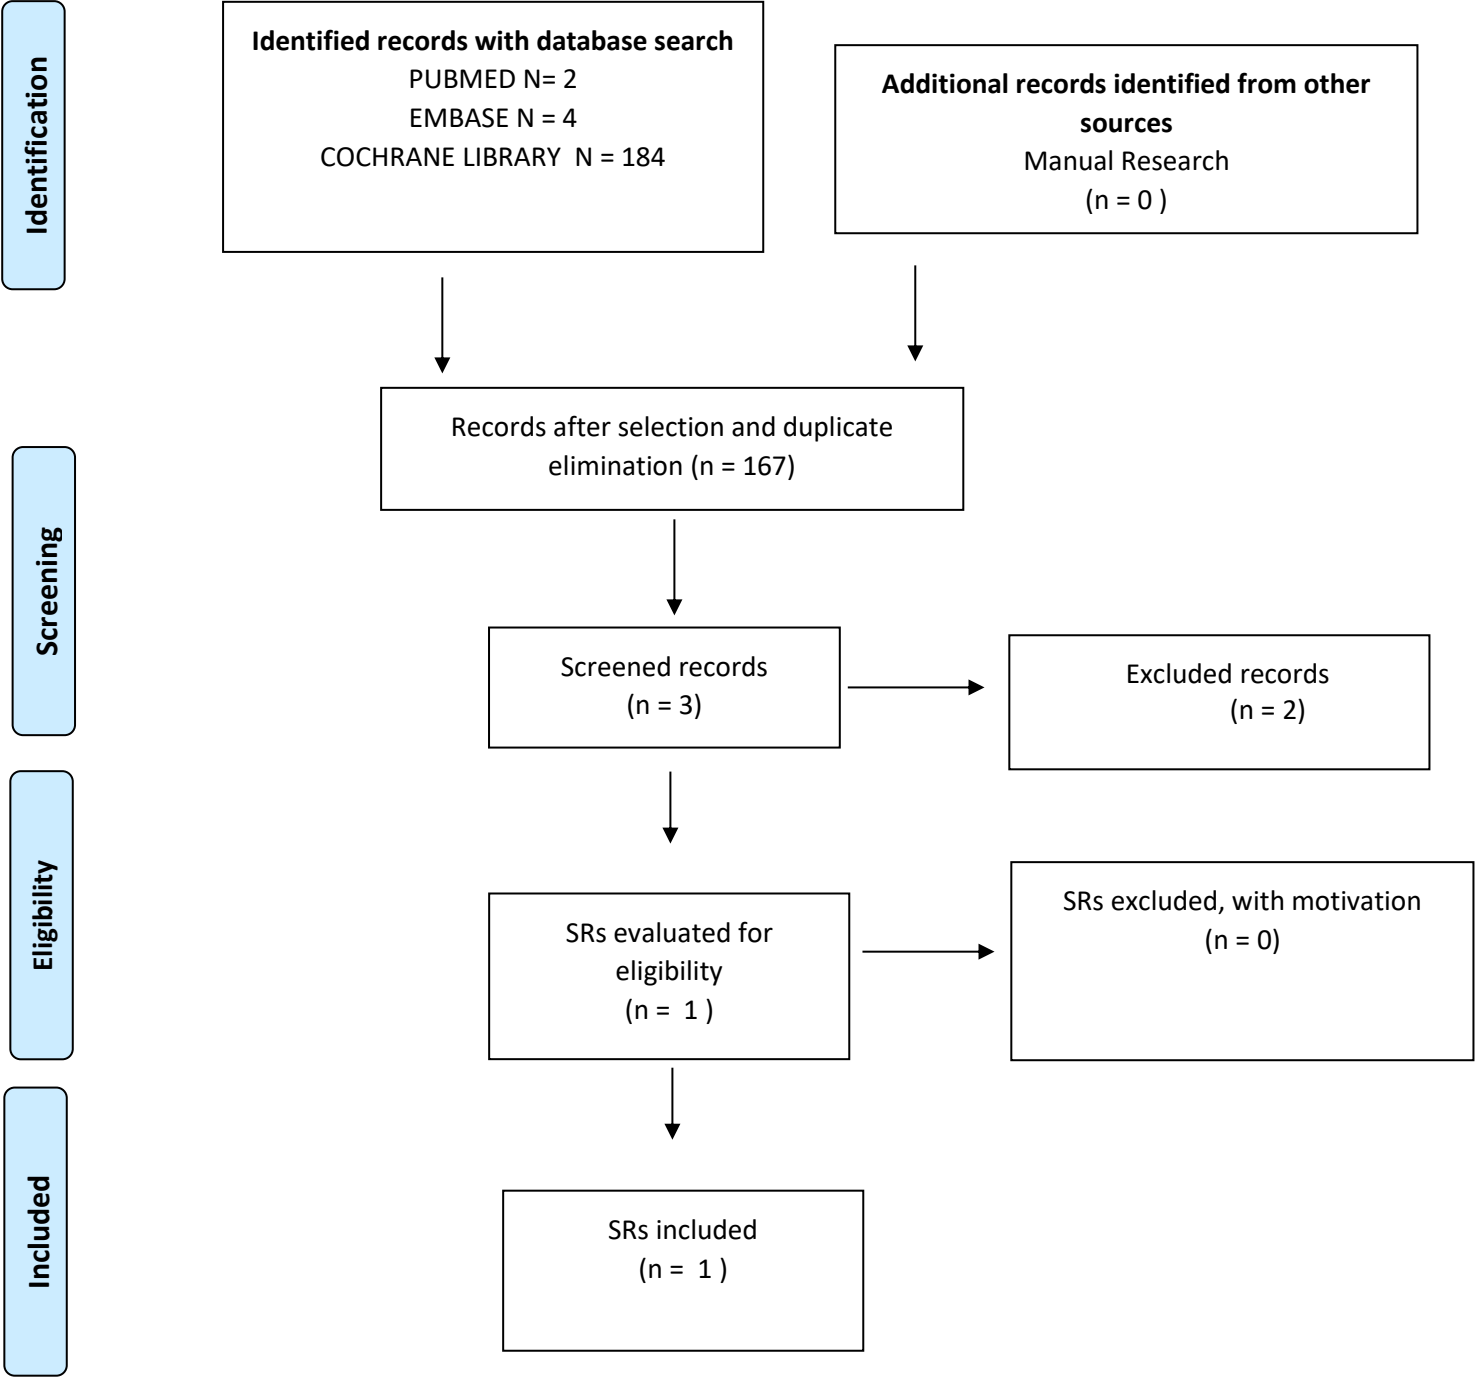

**Figure S1f: Studies search flow diagram.**

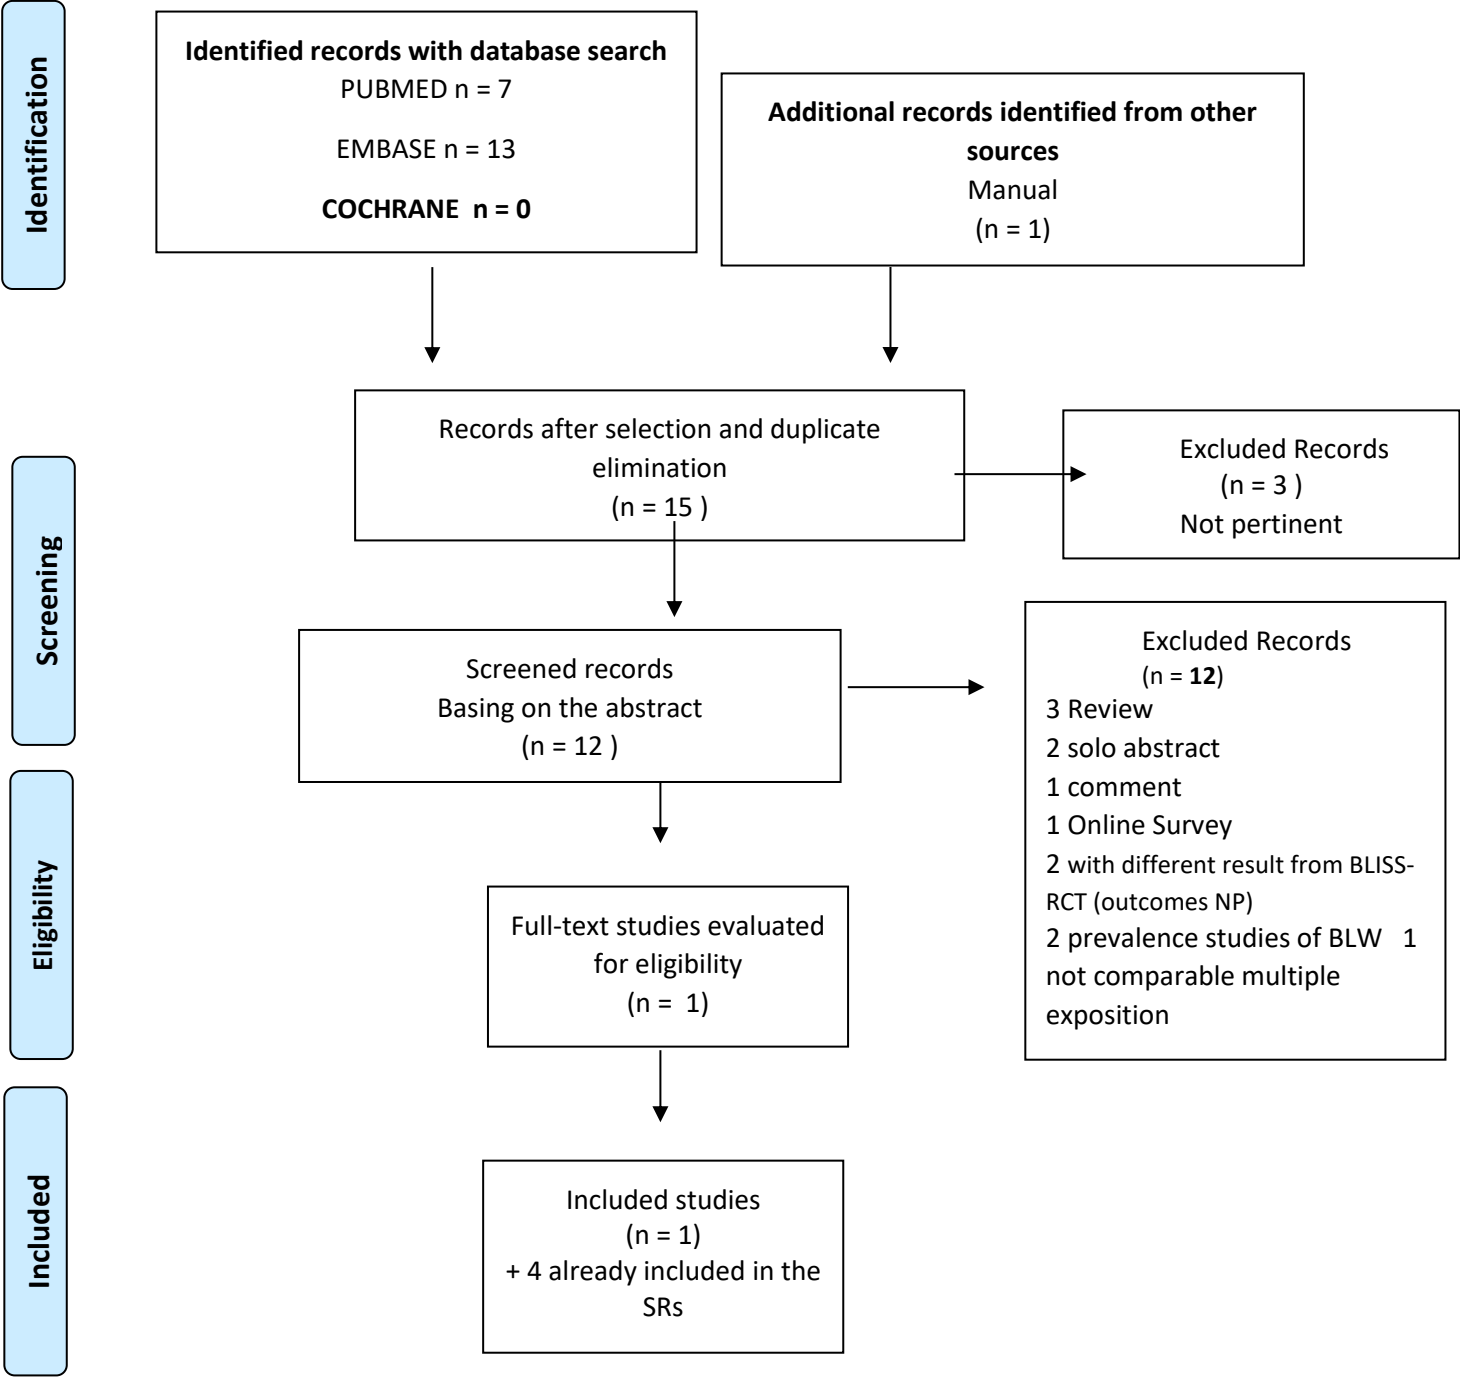

## RCF /NRCF and growth

- C. Can RF during the CF period (Responsive Complementary Feeding - RCF) influence, either positively or negatively, physical growth?*
- D. Can Non-Responsive Feeding during the CF period (Non-Responsive Complementary Feeding - NRCF) influence, either positively or negatively, physical growth?*

## PICOs

### C.

- P. Healthy child aged 6-24 months
- I. Responsive Complementary Feeding
- C. Compared to others feeding models
- O. Does it involve a different physical growth in later ages?

### D.

- P. Healthy child aged 6-24 months
- I. Non-responsive Complementary Feeding
- C. Compared to others feeding models
- O. Does it involve a different physical growth in later ages?

## KEY WORDS

### Population

- H. No age limit
- I. ([infant]/lim OR [child]/lim OR [preschool]/lim

### Exposure Factors / Comparison

- A. Infant Nutritional Physiological Phenomena [MeSH]
- B. Weaning"[MeSH])
- C. "Feeding Behavior"[MeSH]
- D. "Feeding Methods"[MeSH]
- E. "feeding practice"[All Fields]
- F. "parenting style"
- G. "feeding style" [All Fields]
- H. "feeding patterns" [All Fields]
- I. "responsive feeding" [All Fields]
- J. "non responsive feeding" "[All Fields]
- K. "responsiveness"[All Fields]
- L. "complementary feeding"[All Fields]

### Outcomes

- "Growth and Development"[Mesh]
- "Growth"[Mesh])
- "Growth Charts"[Mesh])

"Body Height"[Mesh])  
"Body Weight"[Mesh])  
"Body-Weight Trajectory"[Mesh])  
"Body Weight Changes"[Mesh]

## Guidelines search

### PubMed

#1

("Growth and Development"[Mesh] OR "Growth"[Mesh]) OR "Growth Charts"[Mesh] AND ((Practice Guideline[ptyp] OR Guideline[ptyp]) AND "2014/08/11"[PDat] : "2021/09/15"[PDat] AND "humans"[MeSH Terms])

### EMBASE

#1

('growth'/exp OR 'growth, development and aging'/exp) AND ('complementary feeding'/exp OR 'responsiveness' OR 'responsive feeding' OR 'non responsive feeding') AND ([adolescent]/lim OR [child]/lim OR [infant]/lim OR [preschool]/lim OR [school]/lim OR [young adult]/lim) AND [2014-2019]/py AND 'practice guideline'/de

### UPTODATE <https://www.uptodate.com/home>

Society Guideline Links: *Breastfeeding and infant nutrition*

### SOCIETY GUIDELINE LINKS:

National Guideline Clearinghouse (NGC) <https://www.ahrq.gov/gam/index.html>

Canadians Medical Association (CMA) <https://www.cma.ca/clinicalresources/practiceguidelines>

National Guideline Centre (NGC) - National Institute of Health and Care Excellence (NICE)  
<https://www.rcplondon.ac.uk/about-us/what-we-do/national-guideline-centre-ngc>

Scottish Intercollegiate Guidelines Network (SIGN) <https://www.sign.ac.uk/our-guidelines.html>

Australian Clinical Practice Guidelines (ACPG) <https://www.clinicalguidelines.gov.au/>

New Zealand Guidelines Group (NZGG) <https://www.health.govt.nz/about-ministry/ministry-health-websites/new-zealand-guidelines-group>

American Academy of Pediatrics (AAP) <https://www.aap.org/en-us/Pages/Default.aspx>

EPA/UNEPSA <http://www.epa-unepsa.org/>

Guidelines International Network <https://g-i-n.net/>

Società Italiana di Pediatria (SIP) <http://www-sip.it/>

Società Italiana di Pediatria Preventiva e Sociale (SIPPS) <https://www.sipps.it/>

Società Italiana di Endocrinologia e Diabetologia Pediatrica (SIEDP)  
<http://www.siedp.it/pagina/84/linee+guida%2C+raccomandazioni+e+consensus>

## Systematic Reviews search

### COCHRANE LIBRARY

- A. “Child Health/Develop-psych-learn problems” in Title Abstract Keyword
- B. “Endocrine & Metabolic” in Title Abstract Keyword
- J. “Weaning”

Custom date range Topics: 01.01.2014 - 15.09/2021

### PubMed

#1

("responsive feeding"[All Fields] OR "non-responsive feeding"[All Fields] OR "responsiveness"[All Fields] OR "Weaning"[All Fields] OR "Infant Nutritional Physiological Phenomena"[MeSH] OR "complementary feeding"[All Fields] OR "Feeding Behavior"[All Fields]) AND (((("Growth and Development"[Mesh]) OR "Growth"[Mesh]) OR "Growth Charts"[Mesh]) OR "Body Height"[Mesh]) OR "Body Weight"[Mesh]) OR "Body-Weight Trajectory"[Mesh]) OR "Body Weight Changes"[Mesh]) AND ((Meta-Analysis[ptyp] OR systematic[sb]) AND ("2014/08/13"[PDat] : "2021/09/15"[PDat]))

### EMBASE

#1

('complementary feeding'/exp OR 'weaning'/exp OR 'responsiveness' OR 'responsive feeding' OR 'non responsive feeding') AND ('growth'/exp OR 'growth, development and aging'/exp OR 'body weight'/exp OR 'body mass'/exp) AND [2014-2021]/py AND ([cochrane review]/lim OR [systematic review]/lim OR [meta analysis]/lim)

## Primary Studies search (post-bibliographic search in the SR of Spill 2019 - January 2017)

**Cochrane Trials ("2017/01/01"[PDat] : "2021/09/15"[PDat])**

- A. “Child Health/Develop-psych-learn problems” in Title Abstract Keyword
- B. “Endocrine & Metabolic” in Title Abstract Keyword
- C. “Weaning”



## PubMed

#1

(incentiv\* OR indulgen\*[tiab] OR authorita\*[tiab] OR reward\* OR control\* OR pressur\* OR restrict\* OR monitor\* OR respons\* OR sooth\*[tiab] OR encourag\* OR discourage\* OR uninvolv\* OR disengage\* OR parenting style\* OR laissez-faire OR laissez faire\* OR non-respons\* OR nonrespons\* OR force\*) AND (feeding\* OR fed[tiab] OR eat[tiab] OR eating OR "Feeding Methods"[Mesh:noexp] OR "Feeding Behavior"[Mesh:NoExp] OR satiety OR hunger OR hungry OR satiat\*) AND (cue OR cues) OR feeding method\* OR feeding practice\* OR feeding pattern\* OR feeding frequenc\* OR infant feed\* OR feeding behavior\*[tiab] OR feeding style\* OR feeding strategy\*)AND (((("Growth and Development"[Mesh]) OR "Growth"[Mesh]) OR "Growth Charts"[Mesh]) AND (Clinical Trial[ptyp] OR Comparative Study[ptyp] OR Controlled Clinical Trial[ptyp] OR Observational Study[ptyp] OR Pragmatic Clinical Trial[ptyp] OR Randomized Controlled Trial[ptyp] OR Multicenter Study[ptyp])) AND ("2017/01/01"[PDat] : "2021/09/15"[PDat])

#2

("responsive feeding"[All Fields] OR "non-responsive feeding"[All Fields] OR "responsiveness"[All Fields] OR "Weaning"[All Fields] OR "Infant Nutritional Physiological Phenomena"[MeSH] OR "complementary feeding"[All Fields] OR "Feeding Behavior"[All Fields]) AND (((("Growth and Development"[Mesh]) OR "Growth"[Mesh]) OR "Growth Charts"[Mesh]) OR "Body Height"[Mesh]) OR "Body-Weight Trajectory"[Mesh]) OR "Body Weight Changes"[Mesh]) AND (Clinical Trial[ptyp] OR Comparative Study[ptyp] OR Controlled Clinical Trial[ptyp] OR Observational Study[ptyp] OR Pragmatic Clinical Trial[ptyp] OR Randomized Controlled Trial[ptyp] OR Multicenter Study[ptyp]) AND ("2017/01/01"[PDat] : "2021/09/15"[PDat])

## EMBASE

#1

('complementary feeding'/exp OR 'responsiveness' OR 'responsive feeding' OR 'non responsive feeding') AND ('growth'/exp OR 'growth, development and aging'/exp) AND [2017-2021]/py AND ('case control study'/de OR 'clinical trial'/de OR 'cohort analysis'/de OR 'comparative effectiveness'/de OR 'comparative study'/de OR 'controlled clinical trial'/de OR 'controlled study'/de OR 'cross-sectional study'/de OR 'double blind procedure'/de OR 'human'/de OR 'longitudinal study'/de OR 'multicenter study'/de OR 'observational study'/de OR 'prospective study'/de OR 'randomized controlled trial'/de OR 'retrospective study'/de) AND ([child]/lim OR [infant]/lim OR [preschool]/lim)

**Figure S1g: Guideline search flow diagram**

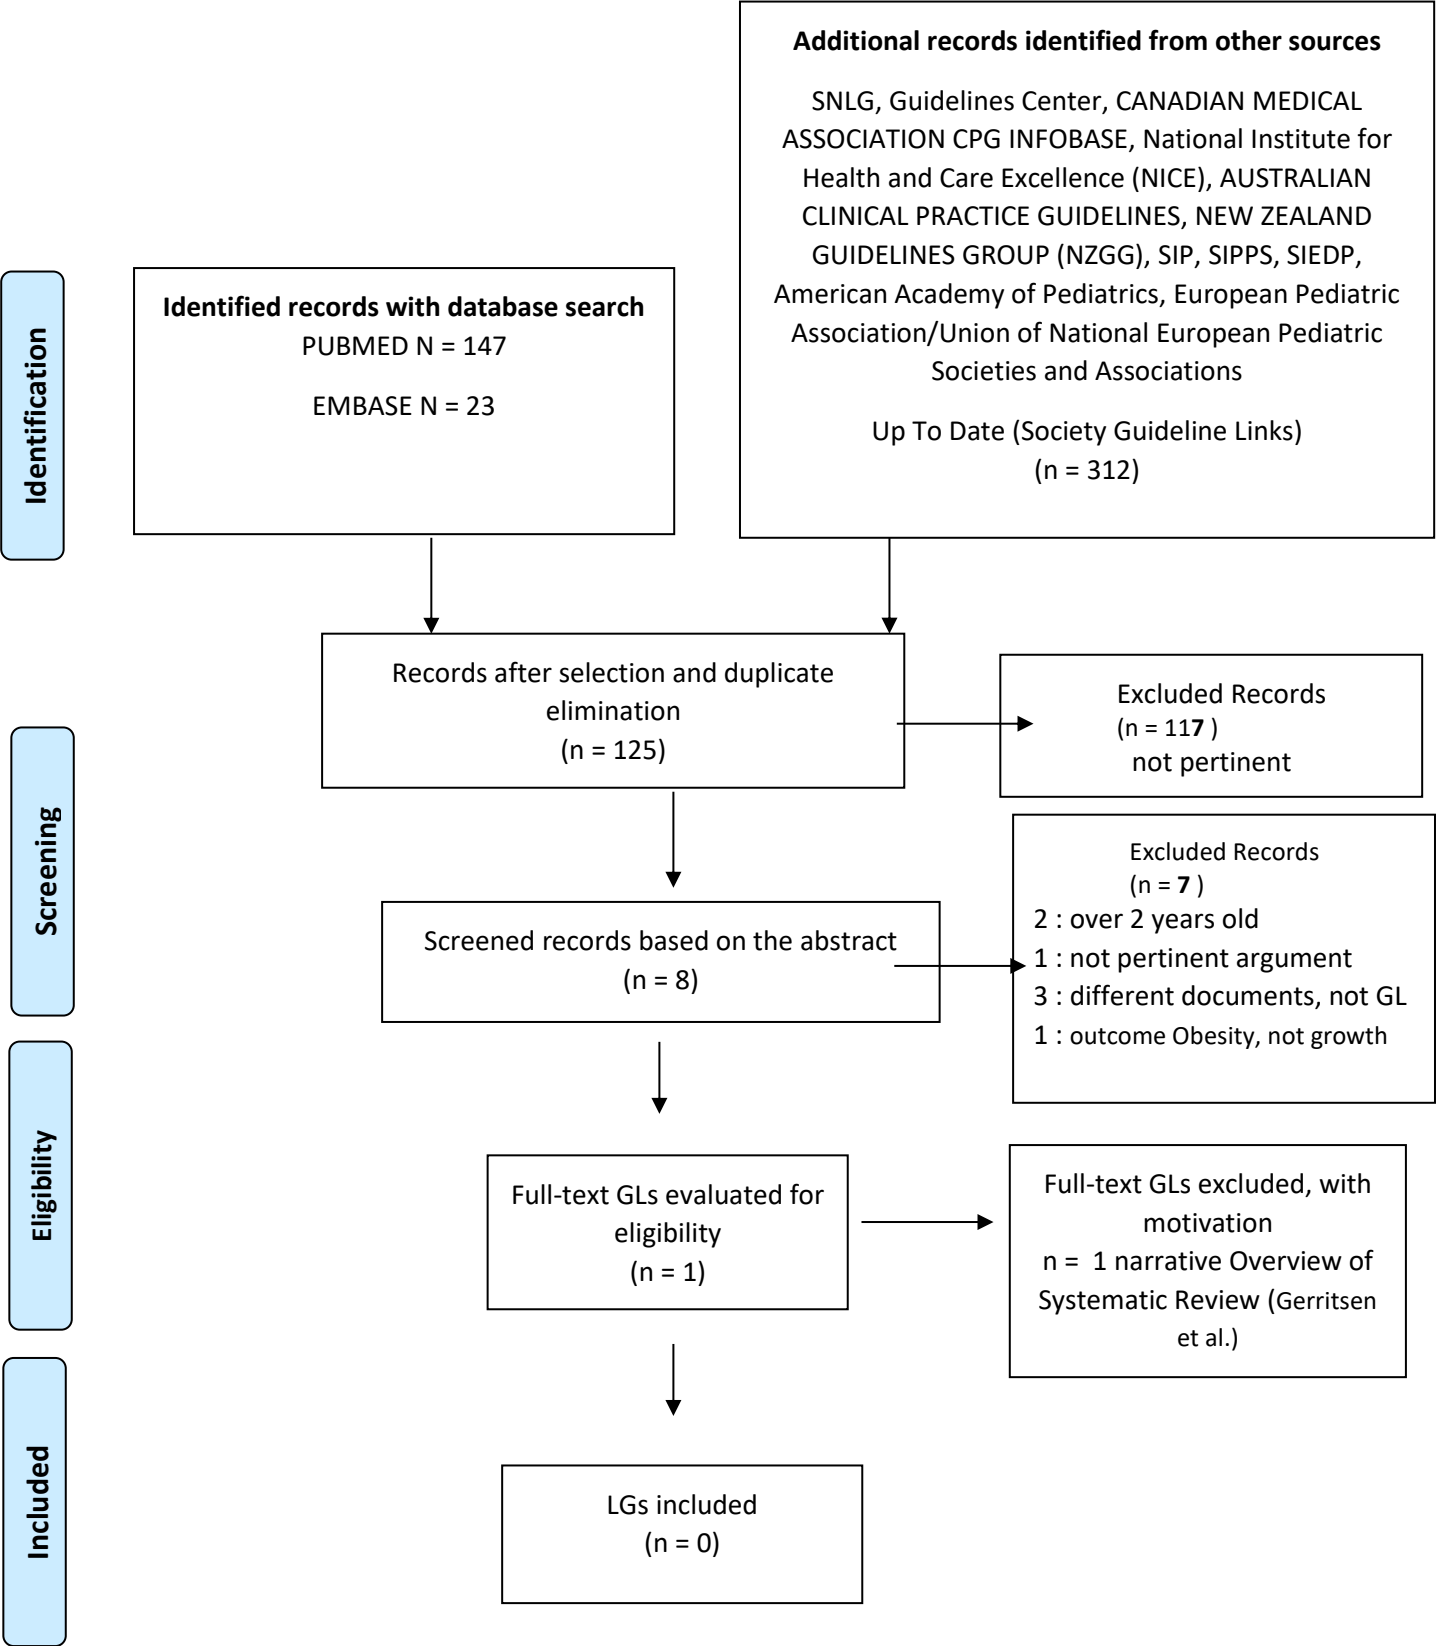

**Figure S1h: SRs search flow diagram**

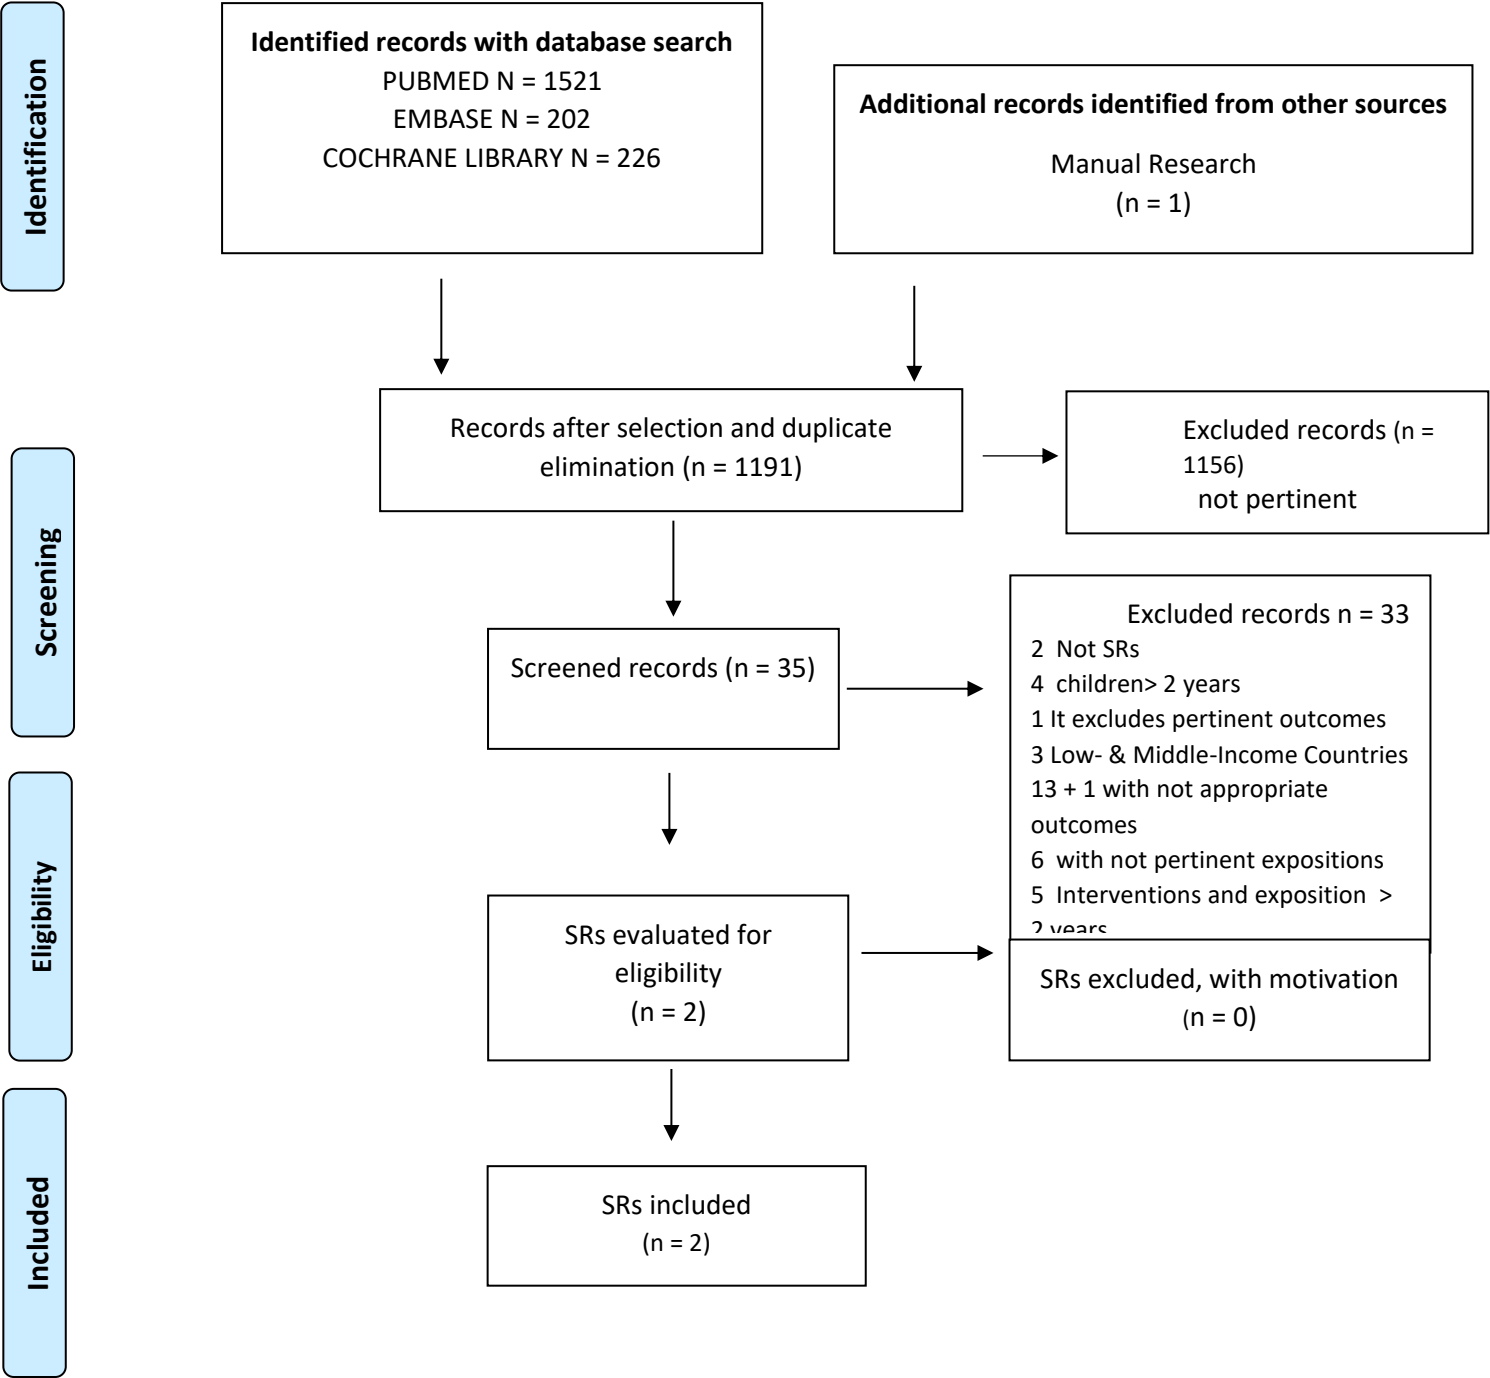

**Figure S1.i: Studies search flow diagram. (post-bibliographic search in the SR of Spill 2019 - January 2017)**

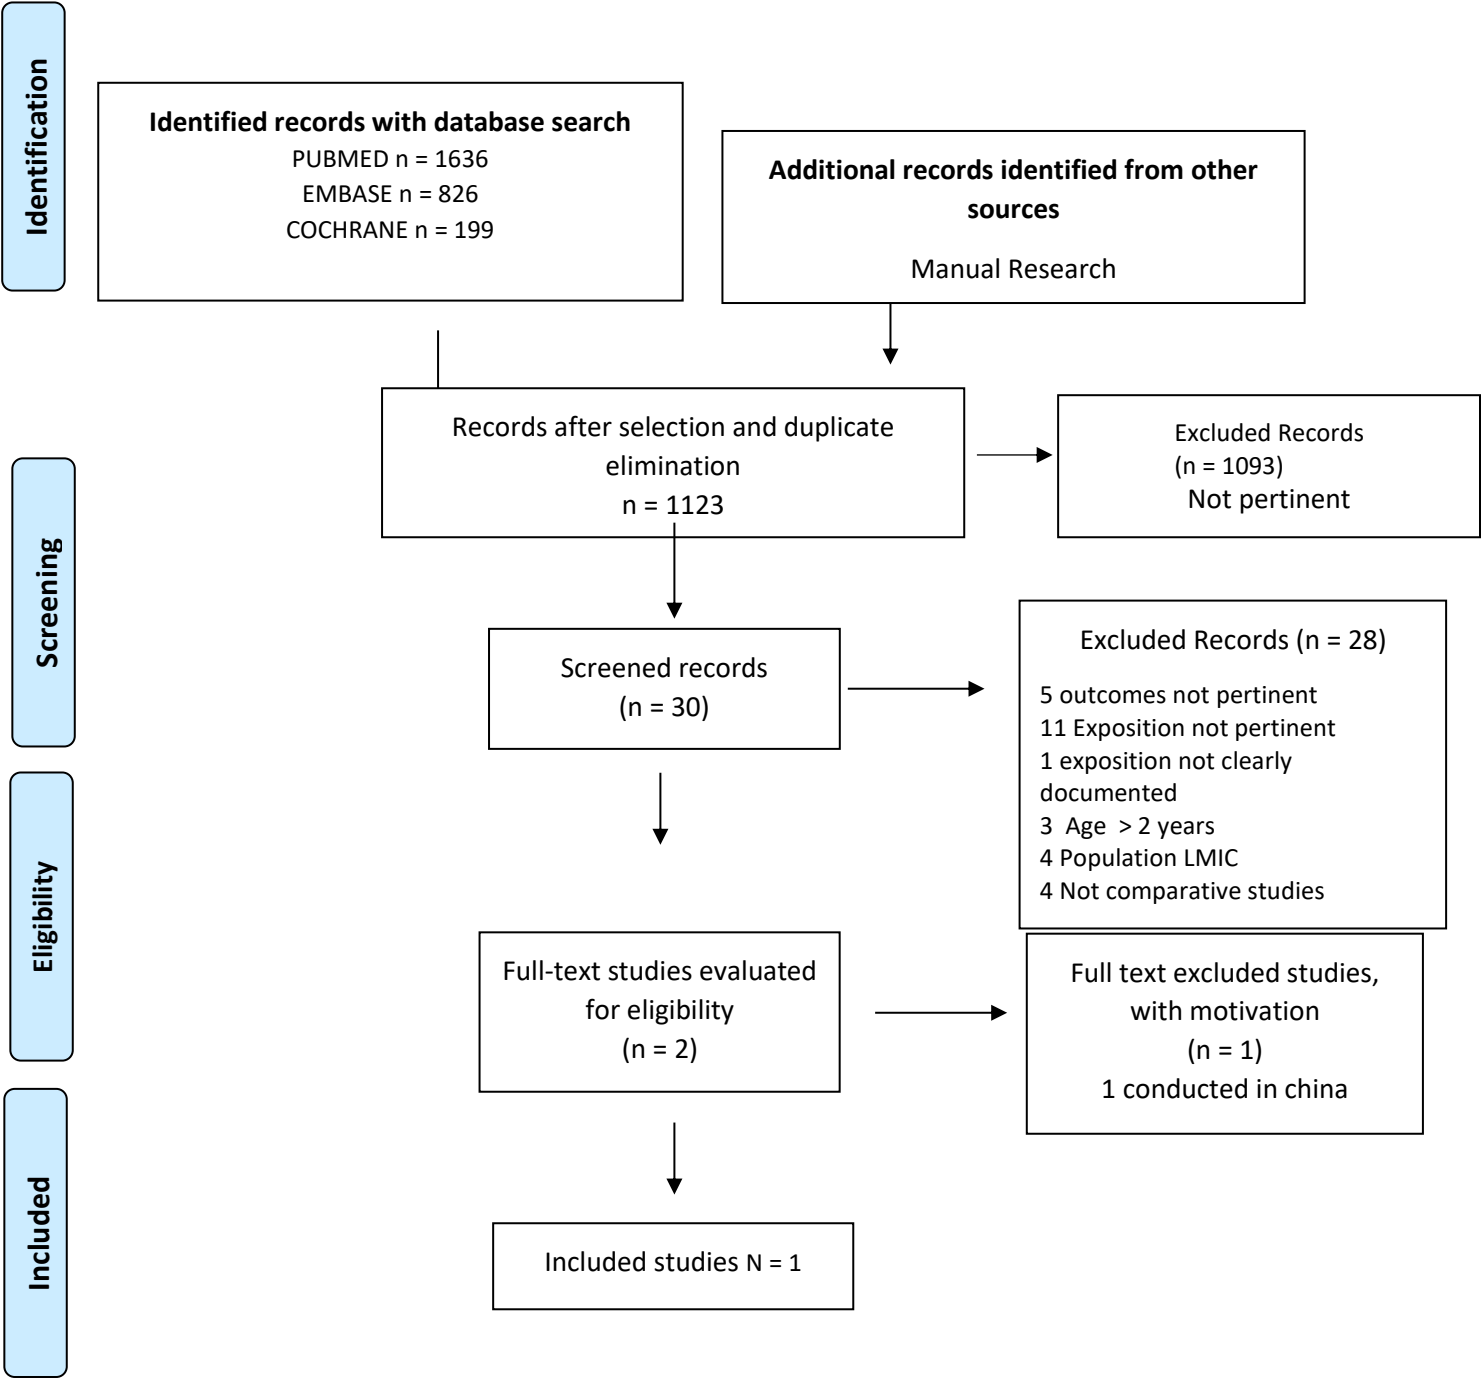

## **RCF / NRCF and risk of overweight/obesity**

*E. Can RCF influence the development of overweight and obesity?*

*F. Can NRCF influence the development of overweight and obesity?*

## **PICOs**

**E.**

**P.** Healthy child aged 6-24 months

**I.** Responsive Complementary Feeding

**C.** Compared to others feeding models

**O.** Does it involve a different risk of development overweight and obesity in later age?

**F.**

**P.** Healthy child aged 6-24 months

**I.** Non-responsive Complementary Feeding

**C.** Compared to others feeding models

**O.** Does it involve a different risk of development overweight and obesity in later age?

## **KEY WORDS**

### **Population**

**D.** No age limit

**E.** ([infant]/lim OR [child]/lim OR [preschool]/lim

### **Exposure Factors / Comparison**

**M.** Infant Nutritional Physiological Phenomena [MeSH]

**N.** Weaning"[MeSH])

**O.** "Feeding Behavior"[MeSH]

**P.** ("Feeding Methods"[MeSH]

**Q.** "feeding practice"[All Fields]

**R.** "parenting style"

**S.** "feeding style" [All Fields]

**T.** "feeding patterns" [All Fields]

**U.** "responsive feeding" [All Fields]

**V.** "non responsive feeding" "[All Fields]

**W.** "responsiveness"[All Fields]

**X.** "complementary feeding"[All Fields]

### **Outcomes**

"Body Height"[Mesh])

"Body Weight"[Mesh])

"Body-Weight Trajectory"[Mesh])

"Body Weight Changes"[Mesh]

"Body Composition"[Mesh])

"Nutritional Status"[Mesh]

("Obesity"[Mesh]  
"Pediatric Obesity"[Mesh])  
"Overweight"[Mesh]

## **Guidelines search**

### **PUBMED**

#1

("Obesity"[Mesh] OR "Pediatric Obesity"[Mesh] OR "Overweight"[Mesh] OR "Body Mass Index"[Mesh] OR "Body Weight Changes"[Mesh] OR "Body Weight"[Mesh] OR "Body Composition"[Mesh] OR "Nutritional Status"[Mesh]) AND ((Practice Guideline[ptyp] OR Guideline[ptyp]) AND ("2014/09/15"[PDat] : "15.09.2021"[PDat]))

### **EMBASE**

#1

('obesity'/exp OR obesity) AND [2014-2021]/py AND 'practice guideline'/de AND ([child]/lim OR [infant]/lim)

### **SOCIETY GUIDELINE LINKS:**

National Guideline Clearinghouse (NGC) <https://www.ahrq.gov/gam/index.html>

Canadians Medical Association (CMA) <https://www.cma.ca/clinicalresources/practiceguidelines>

National Guideline Centre (NGC) - National Institute of Health and Care Excellence (NICE)  
<https://www.rcplondon.ac.uk/about-us/what-we-do/national-guideline-centre-ngc>

Scottish Intercollegiate Guidelines Network (SIGN) <https://www.sign.ac.uk/our-guidelines.html>

Australian Clinical Practice Guidelines (ACPG) <https://www.clinicalguidelines.gov.au/>

New Zealand Guidelines Group (NZGG) <https://www.health.govt.nz/about-ministry/ministry-health-websites/new-zealand-guidelines-group>

American Academy of Pediatrics (AAP) <https://www.aap.org/en-us/Pages/Default.aspx>

EPA/UNEPSA <http://www.epa-unepsa.org/>

Guidelines International Network <https://g-i-n.net/>

European Childhood Obesity Group <https://www.ecog-obesity.eu/>

Società Italiana di Pediatria (SIP) <http://www-sip.it/>

Società Italiana di Pediatria Preventiva e Sociale (SIPPS) <https://www.sipps.it/>

## Systematic Reviews search

### COCHRANE LIBRARY

'obesity' in Title Abstract Keyword'  
Custom date range Topics: 01.09.2014-15.09.2021

### EMBASE

#1

('obesity'/exp OR 'body mass'/exp OR overweight) AND ('complementary feeding'/exp OR 'weaning'/exp OR 'responsiveness' OR 'responsive feeding' OR 'non responsive feeding') AND ([cochrane review]/lim OR [systematic review]/lim OR [meta analysis]/lim) AND [2014-2021]/py

### PUBMED

#1

((((((("Obesity"[Mesh] OR "Pediatric Obesity"[Mesh]) OR "Overweight"[Mesh]) OR "Body Mass Index"[Mesh]) OR "Body Weight Changes"[Mesh]) OR "Body Weight"[Mesh]) OR "Body Composition"[Mesh]) OR "Nutritional Status"[Mesh]) AND ("responsive feeding"[All Fields] OR "non-responsive feeding"[All Fields] OR "responsiveness"[All Fields] OR "Weaning"[All Fields] OR "Infant Nutritional Physiological Phenomena"[MeSH] OR "complementary feeding"[All Fields] OR "Feeding Behavior"[All Fields]) AND (Meta-Analysis[ptyp] OR systematic[sb]) AND ("2014/09/15"[PDat] : "2021/09/15"[PDat]))

## Studies search (subsequent to SR of Spill et al. - January 2017)

### PUBMED

#1

(incentiv\* OR indulgen\*[tiab] OR authorita\*[tiab] OR reward\* OR control\* OR pressur\* OR restrict\* OR monitor\* OR respons\* OR sooth\*[tiab] OR encourag\* OR discourage\* OR uninvolv\* OR disengage\* OR parenting style\* OR laissez-faire OR laissez faire\* OR non-respons\* OR nonrespons\* OR force\*) AND (feeding\* OR fed[tiab] OR eat[tiab] OR eating OR "Feeding Methods"[Mesh:noexp] OR "Feeding Behavior"[Mesh:NoExp] OR satiety OR hunger OR hungry OR satiat\*) AND (cue OR cues OR feeding method\* OR feeding practice\* OR feeding pattern\* OR feeding frequenc\* OR infant feed\* OR feeding behavior\*[tiab] OR feeding style\* OR feeding

strategy\*) AND (Randomized Controlled Trial[ptyp] OR Pragmatic Clinical Trial[ptyp] OR Observational Study[ptyp] OR Multicenter Study[ptyp] OR Comparative Study[ptyp] OR Clinical Trial[ptyp] OR Controlled Clinical Trial[ptyp]) AND ("2017/01/01"[PDAT] : "2021/09/15"[PDAT]) AND ("infant"[MeSH Terms]).

#2

("responsive feeding"[All Fields] OR "non-responsive feeding"[All Fields] OR "responsiveness"[All Fields] OR "Weaning"[All Fields] OR "Infant Nutritional Physiological Phenomena"[MeSH] OR "complementary feeding"[All Fields] OR "Feeding Behavior"[All Fields]) AND (((((((("Obesity"[Mesh] OR "Pediatric Obesity"[Mesh]) OR "Overweight"[Mesh]) OR "Body Mass Index"[Mesh]) OR "Body Weight Changes"[Mesh]) OR "Body Weight"[Mesh]) OR "Body Composition"[Mesh]) OR "Nutritional Status"[Mesh]) AND (Clinical Trial[ptyp] OR Comparative Study[ptyp] OR Controlled Clinical Trial[ptyp] OR Observational Study[ptyp] OR Pragmatic Clinical Trial[ptyp] OR Randomized Controlled Trial[ptyp]) AND ("2017/01/01"[PDAT] : "2021/09/15"[PDAT])

## EMBASE

#1

('complementary feeding'/exp OR 'weaning' OR 'responsiveness' OR 'responsive feeding' OR 'non responsive feeding') AND ('obesity'/exp OR 'body mass'/exp OR obesity) AND [2017-2021]/py AND ('case control study'/de OR 'clinical study'/de OR 'clinical trial'/de OR 'cohort analysis'/de OR 'comparative effectiveness'/de OR 'comparative study'/de OR 'controlled clinical trial'/de OR 'controlled study'/de OR 'cross-sectional study'/de OR 'double blind procedure'/de OR 'human'/de OR 'multicenter study'/de OR 'observational study'/de OR 'prospective study'/de OR 'randomized controlled trial'/de OR 'retrospective study'/de)



**Figure S1.j: Guideline search flow diagram**

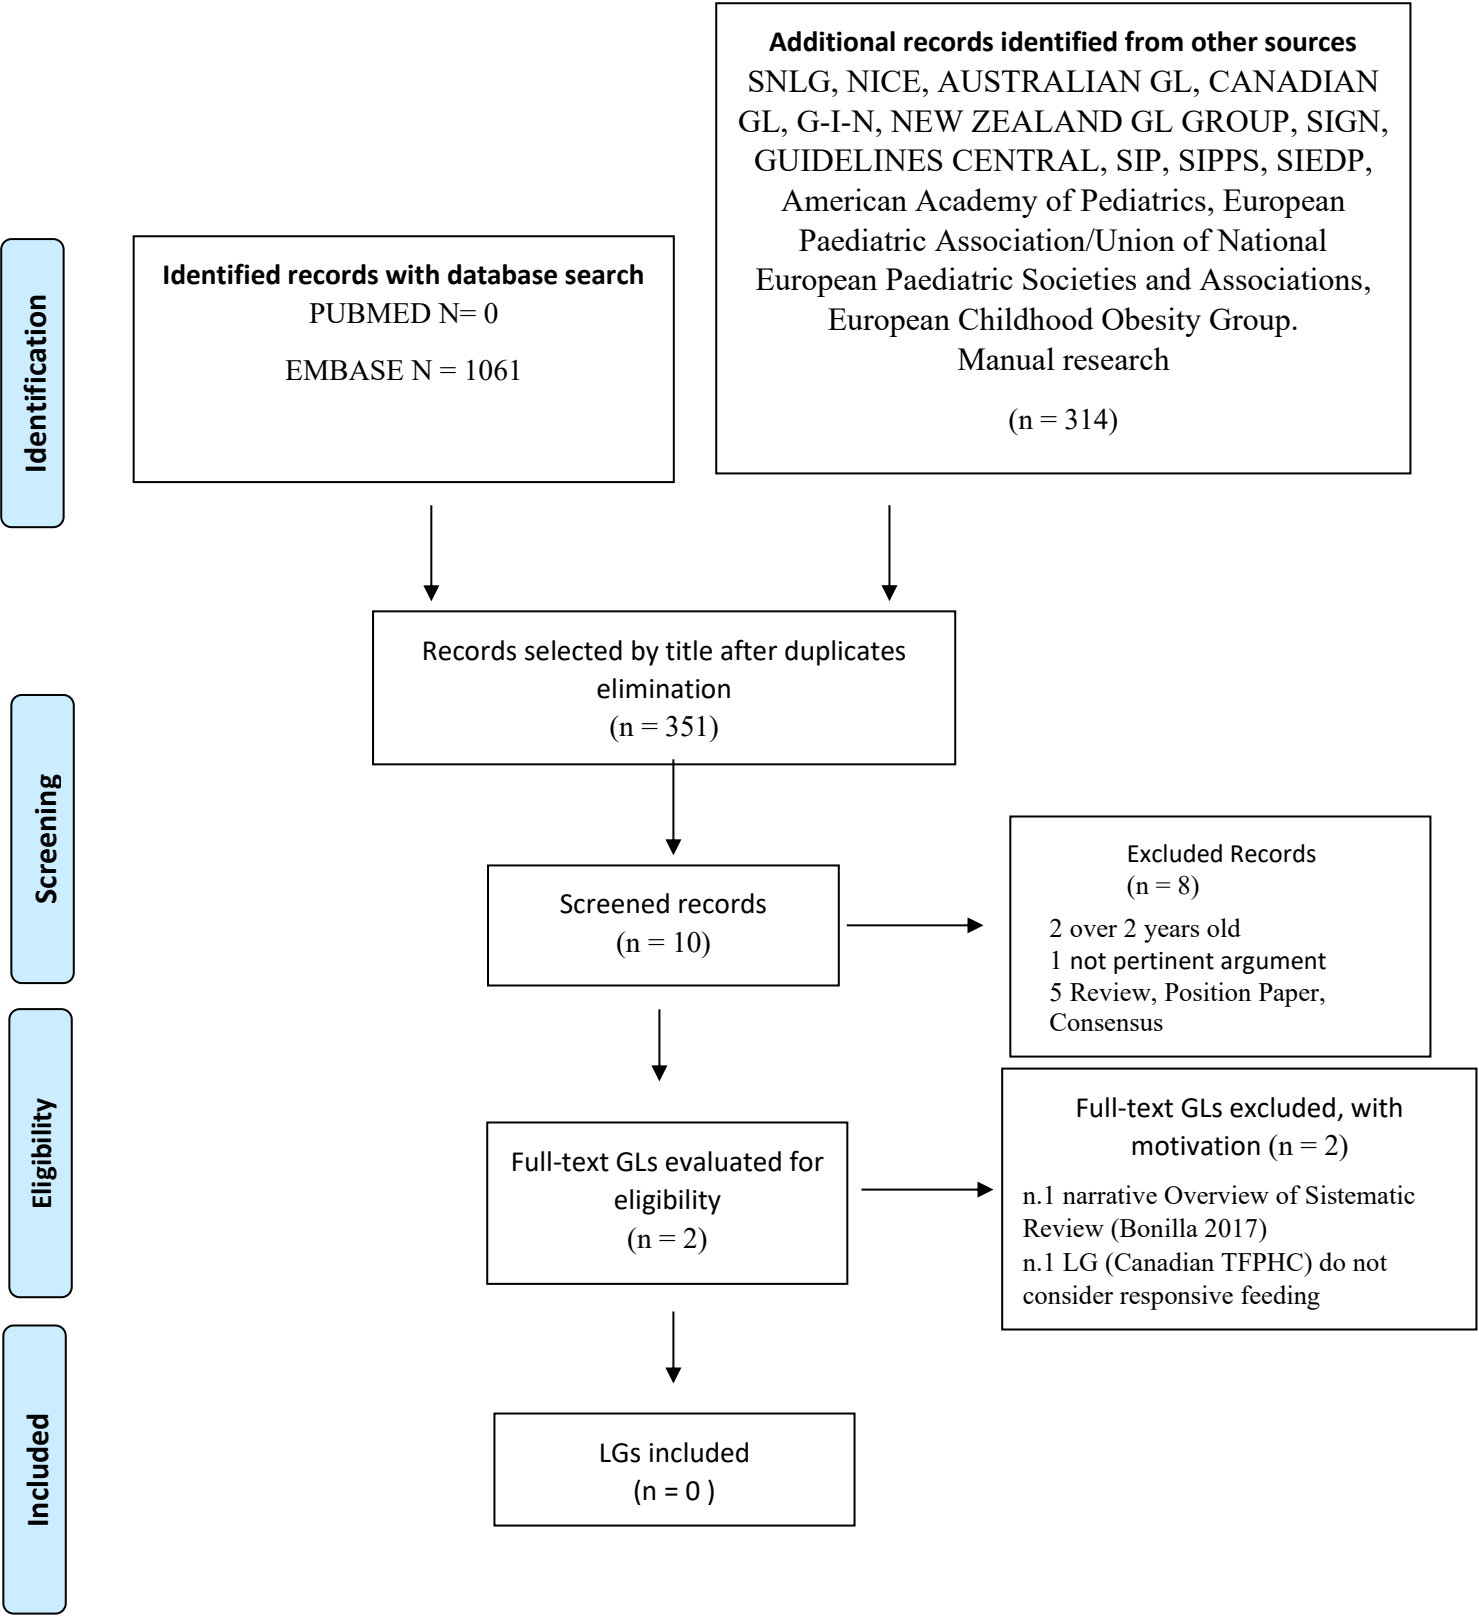

**Figure S1.k: SRs search flow diagram**

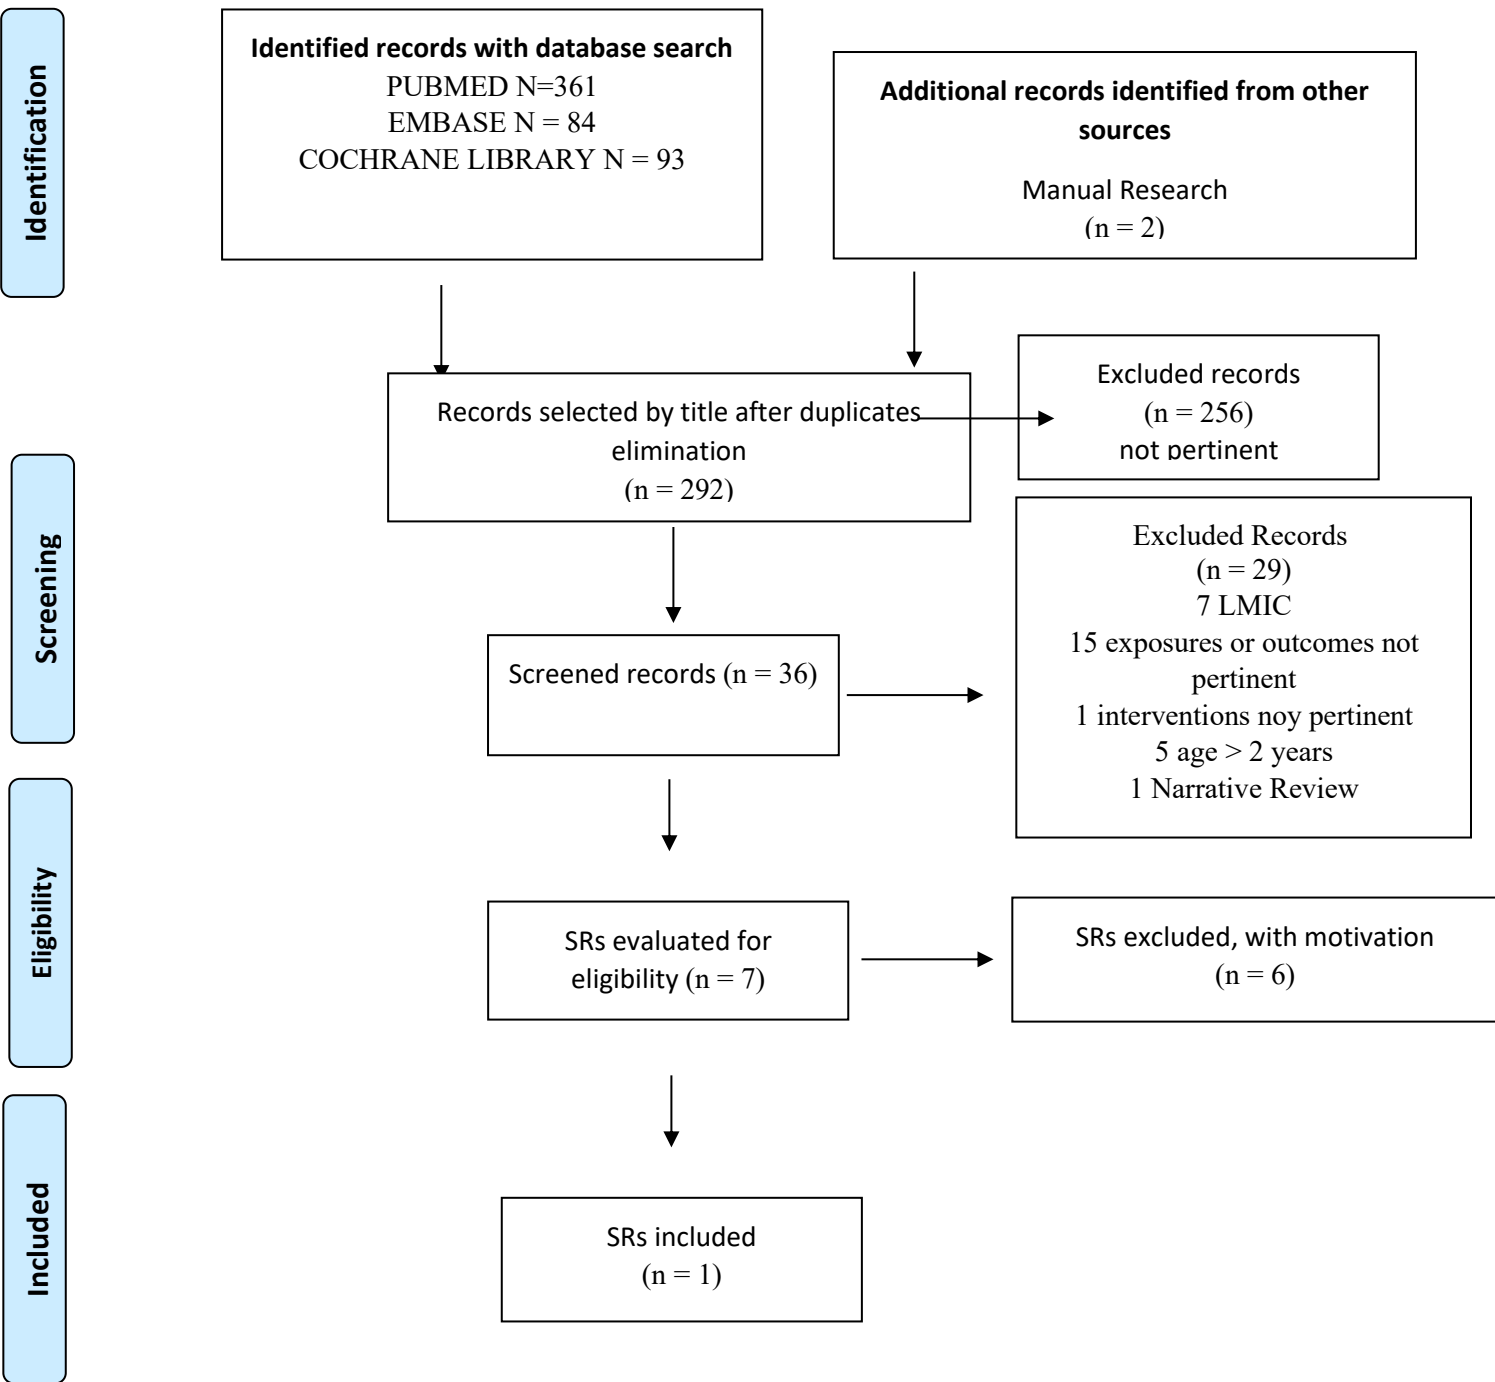

**Figure S1.I: Studies flow diagram**

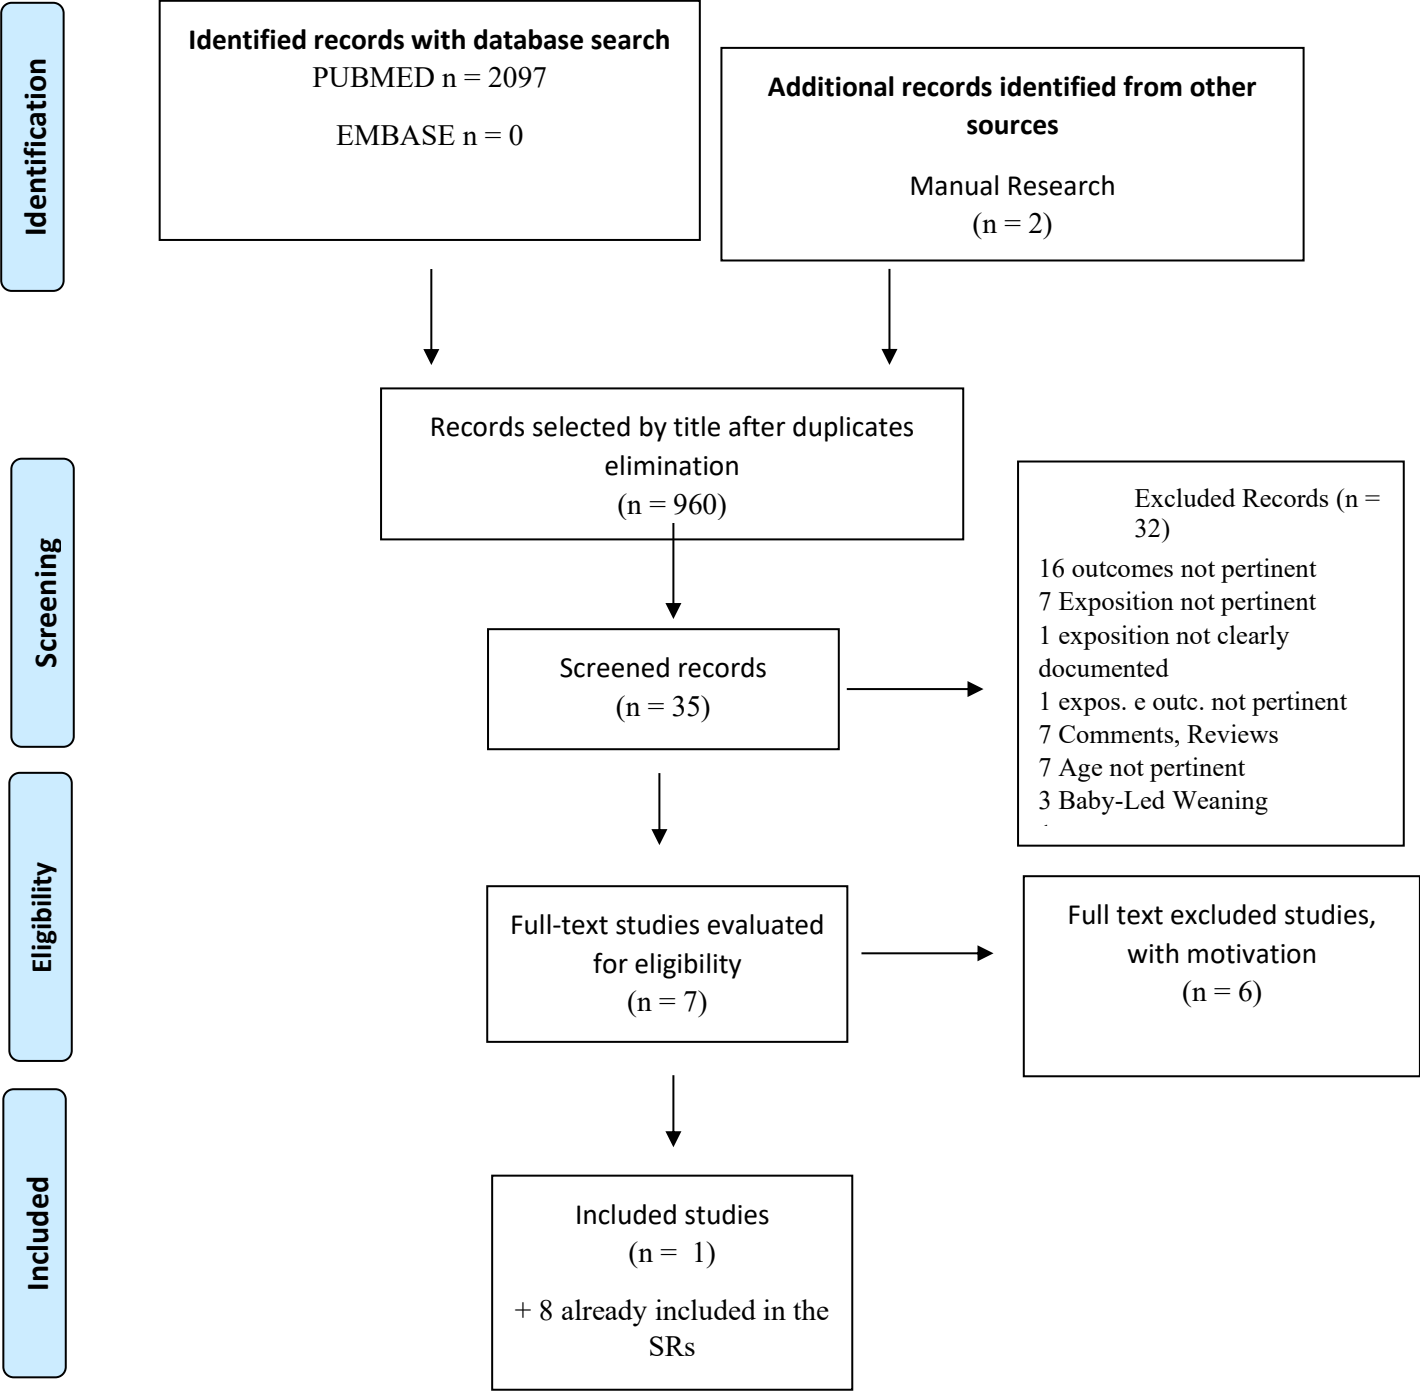

**G. Do the different caregivers' feeding practices (CFPs) during the CF period result in different risks of choking?**

**BLW/BLISS. Risk of choking.**

**P.** In a healthy baby aged 6-24 months  
**I.** the Baby-Led Weaning (or BLISS method)  
**C.** compared to other feeding models  
**O.** result in a different risk of choking?

**KEY WORDS**

**Population**

([infant]/lim OR [child]/lim OR [preschool]/lim

**Exposure Factors / Comparison**

"self weaning"[All Fields]  
"baby led weaning"[All Fields]  
"Infant Nutritional Physiological Phenomena" [MeSH]  
"Weaning"[MeSH])

**Outcomes**

"choking"[All Fields]  
"gagging" [All Fields]  
"Foreign Bodies"[Mesh]

**Guidelines search**

Filters applied: Guideline, Practice Guideline, in the last 5 years.

**PUBMED** <https://www.ncbi.nlm.nih.gov/pubmed/>

#1

("airway obstruction"[MeSH] OR "sudden airway obstruction"[All Fields] OR "acute airway obstruction"[All Fields] OR "choking"[All Fields] OR "gagging" OR "Foreign Bodies"[Mesh])  
AND ("2014/09/16"[PDat] : "2021/09/15"[PDat] )

**EMBASE** <https://www.embase.com>

#1

('airway obstruction'/exp OR 'choking' OR 'respiratory interruption' OR 'acute airway obstruction' OR 'sudden airway obstruction' OR 'foreign body'/exp) AND [2014-2021]/py AND 'practice

## **SOCIETY GUIDELINE LINKS:**

National Guideline Clearinghouse (NGC) <https://www.ahrq.gov/gam/index.html>

Canadians Medical Association (CMA) <https://www.cma.ca/clinicalresources/practiceguidelines>

National Guideline Centre (NGC) - National Institute of Health and Care Excellence (NICE)

<https://www.rcplondon.ac.uk/about-us/what-we-do/national-guideline-centre-ngc>

Scottish Intercollegiate Guidelines Network (SIGN) <https://www.sign.ac.uk/our-guidelines.html>

Australian Clinical Practice Guidelines (ACPG) <https://www.clinicalguidelines.gov.au/>

New Zealand Guidelines Group (NZGG) <https://www.health.govt.nz/about-ministry/ministry-health-websites/new-zealand-guidelines-group>

American Academy of Pediatrics (AAP) <https://www.aap.org/en-us/Pages/Default.aspx>

EPA/UNEPSA <http://www.epa-une psa.org/>

Guidelines International Network <https://g-i-n.net/>

Irish National Clinical Guidelines <https://www.gov.ie/en/collection/c9fa9a-national-clinical-guidelines/>

European Society for Emergency Medicine. Paediatric Section <https://eusem.org/sections-and-committees/sections/paediatric-section>

Society for Academic Emergency Medicine. Pediatric Emergency Medicine

<https://community.saem.org/communities/community-home?CommunityKey=3dc973c2-35fd-42c2-9dcf-99e69a20d206>

Società Italiana di Medicina di Emergenza ed Urgenza Pediatrica SIMEUP <https://www.simeup.it/>

Ministero della Salute Italia [http://www.salute.gov.it/imgs/C\\_17\\_pubblicazioni\\_2618\\_allegato.pdf](http://www.salute.gov.it/imgs/C_17_pubblicazioni_2618_allegato.pdf)

## **Systematic Reviews search**

### **Cochrane Databases**

Cochrane Reviews matching choking OR gagging in Title Abstract Keyword - with Cochrane Library publication date Between Jan 2018 and Jan 2021, in Cochrane Reviews, Trials (Word variations have been searched)

### **PubMed**

#1

("airway obstruction"[MeSH] OR "sudden airway obstruction"[All Fields] OR "acute airway obstruction"[All Fields] OR "choking"[All Fields] OR "gagging"[All Fields] OR "Foreign Bodies"[Mesh]) AND ((Meta-Analysis[ptyp] OR systematic[sb]) AND "2009/09/12"[PDat] : "2021/09/15"[PDat]) AND "infant"[MeSH Terms]

### **EMBASE**

#1

('airway obstruction'/exp OR 'choking' OR 'respiratory interruption' OR 'acute airway obstruction' OR 'sudden airway obstruction' OR 'foreign body'/exp) AND [2009-2021]/py AND ([child]/lim OR [infant]/lim OR [preschool]/lim) AND ([systematic review]/lim OR [meta analysis]/lim)

## **Studies search (subsequent to SR of D'Auria et al. 2018)**

### **PubMed**

#1

("self-weaning"[All Fields] OR "self weaning"[All Fields] OR "baby led weaning"[All Fields] OR "baby-led weaning"[All Fields]) AND ("airway obstruction"[MeSH] OR "sudden airway obstruction"[All Fields] OR "acute airway obstruction"[All Fields] OR "choking"[All Fields] OR "gagging"[All Fields]) AND ((Clinical Trial[ptyp] OR Comparative Study[ptyp] OR Multicenter Study[ptyp] OR Observational Study[ptyp] OR Pragmatic Clinical Trial[ptyp] OR Randomized Controlled Trial[ptyp]) AND ("2018/03/01"[PDAT] : "2021/09/15"[PDAT]) AND "infant"[MeSH Terms])

### **EMBASE**

#1

('baby led weaning'/exp OR 'baby led weaning' OR 'baby led' OR 'self weaning' OR autoweaning) AND ([infant]/lim OR [preschool]/lim) AND [2018-2021]/py AND ('airway obstruction'/exp OR 'choking' OR 'respiratory interruption' OR 'acute airway obstruction' OR 'sudden airway obstruction')

### **Cochrane Databases**

Cochrane Reviews matching choking OR gagging in Title Abstract Keyword - with Cochrane Library publication date Between Jan 2018 and Jan 2021, in Cochrane Reviews, Trials (Word variations have been searched)

**Figure S1.m: Guidelines search flow diagram.**

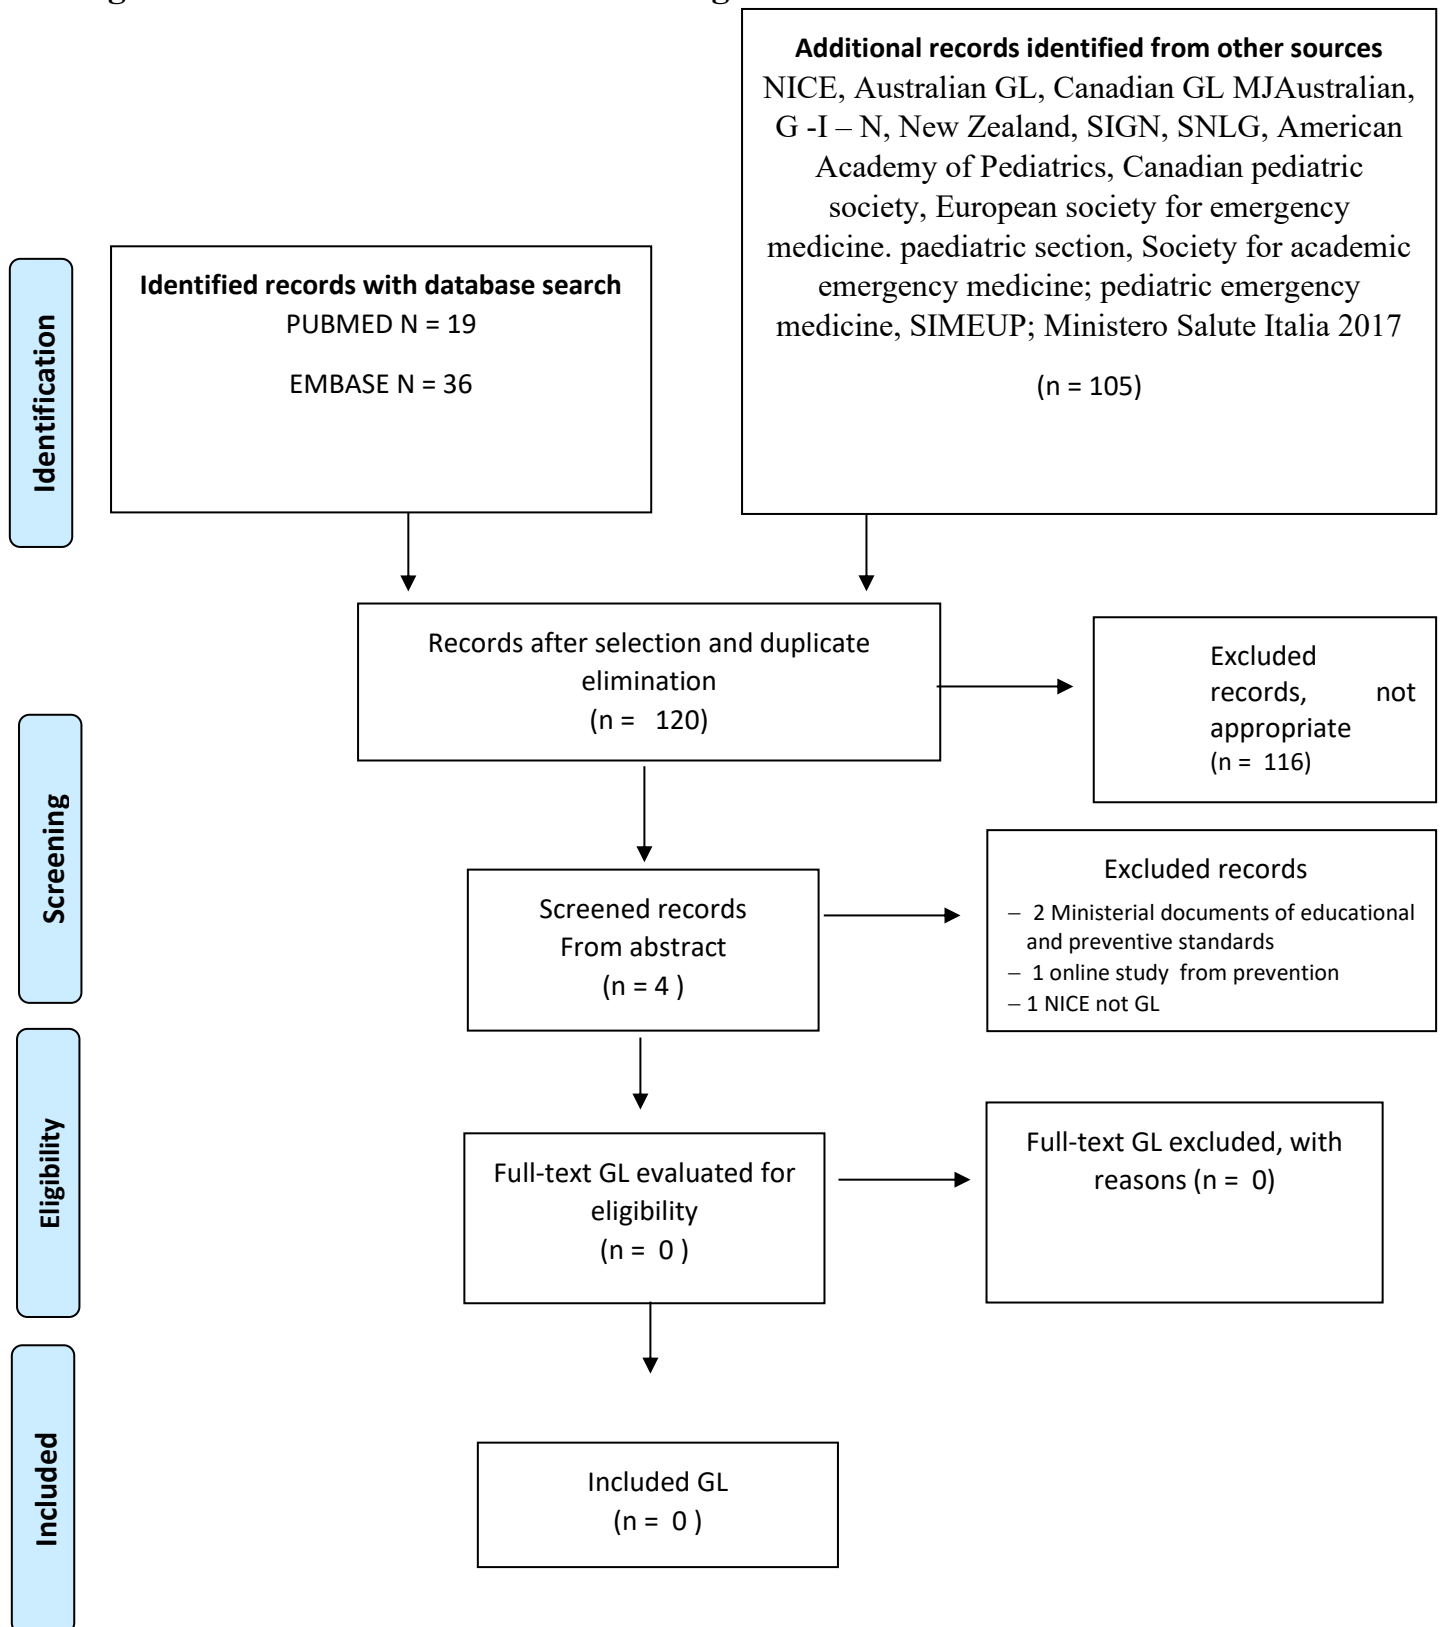

**Figure S1.n: SRs search flow diagram.**

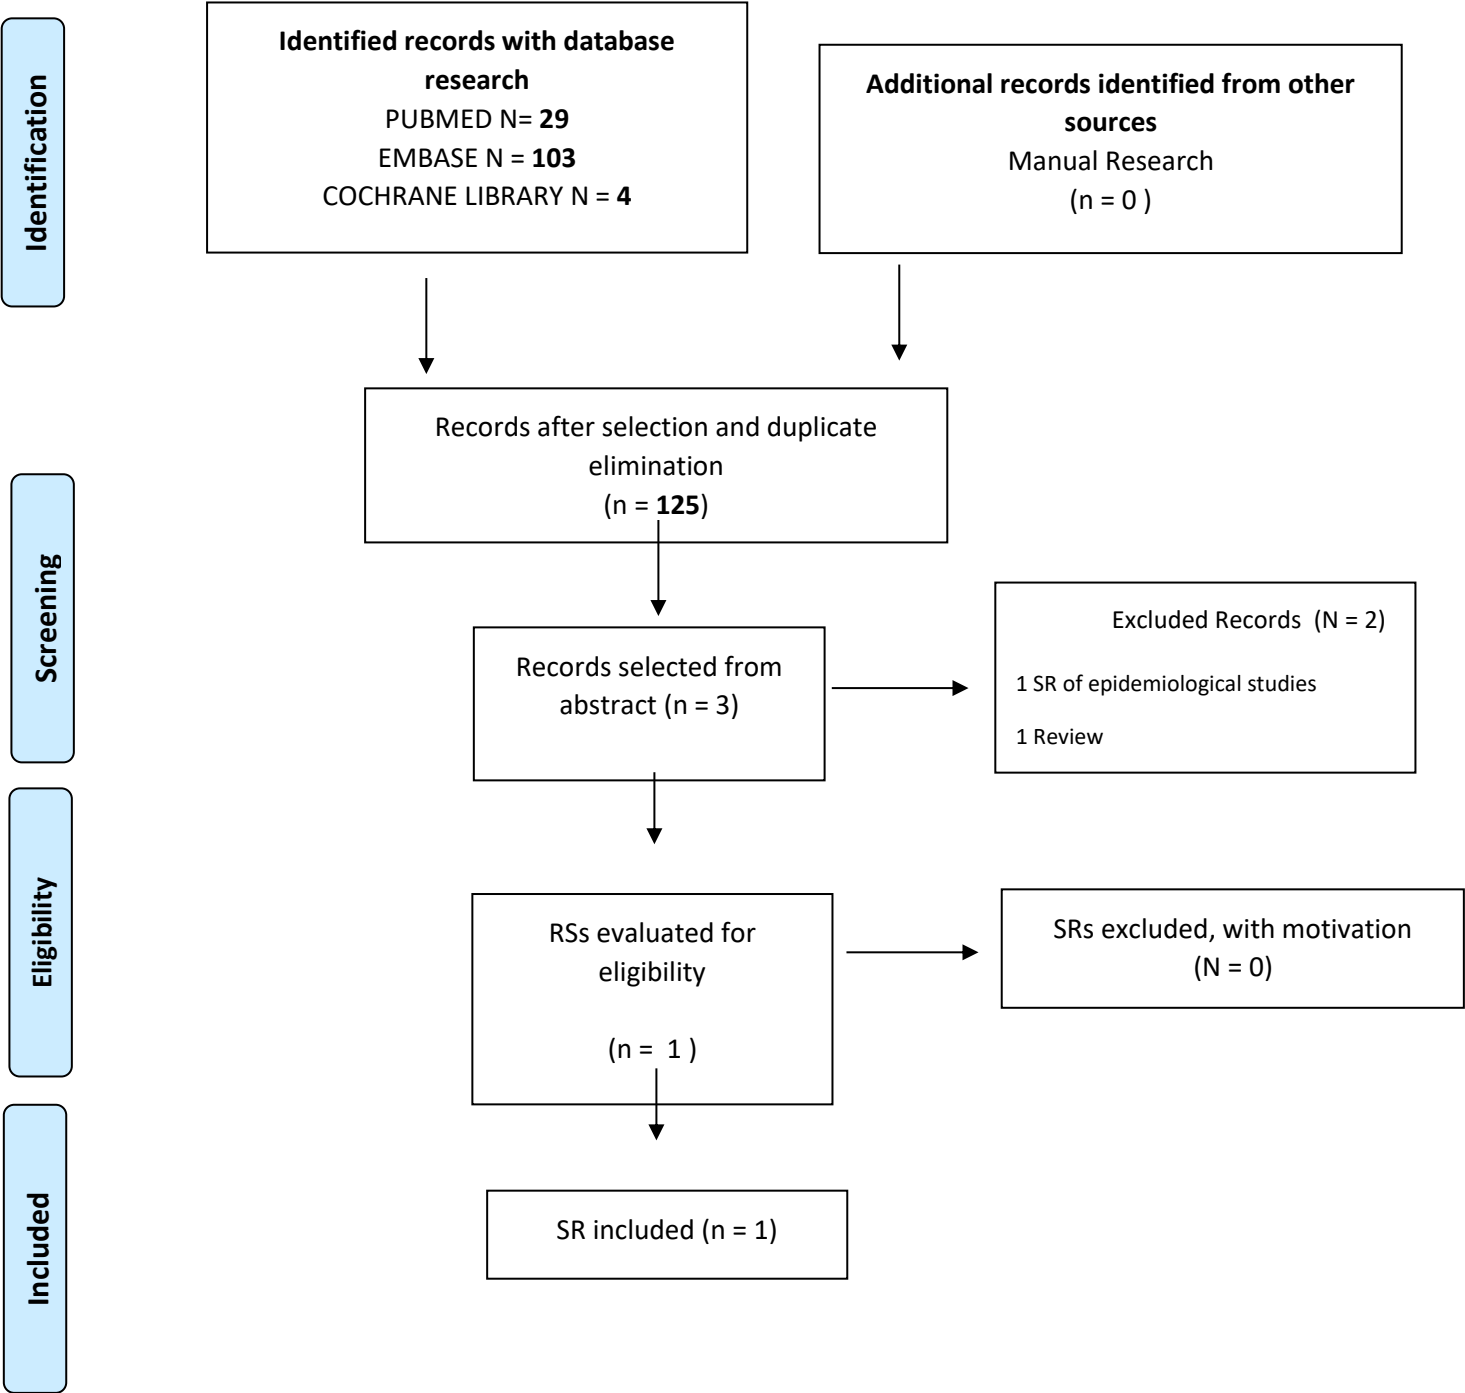



**Figure S1o: Studies flow diagram**

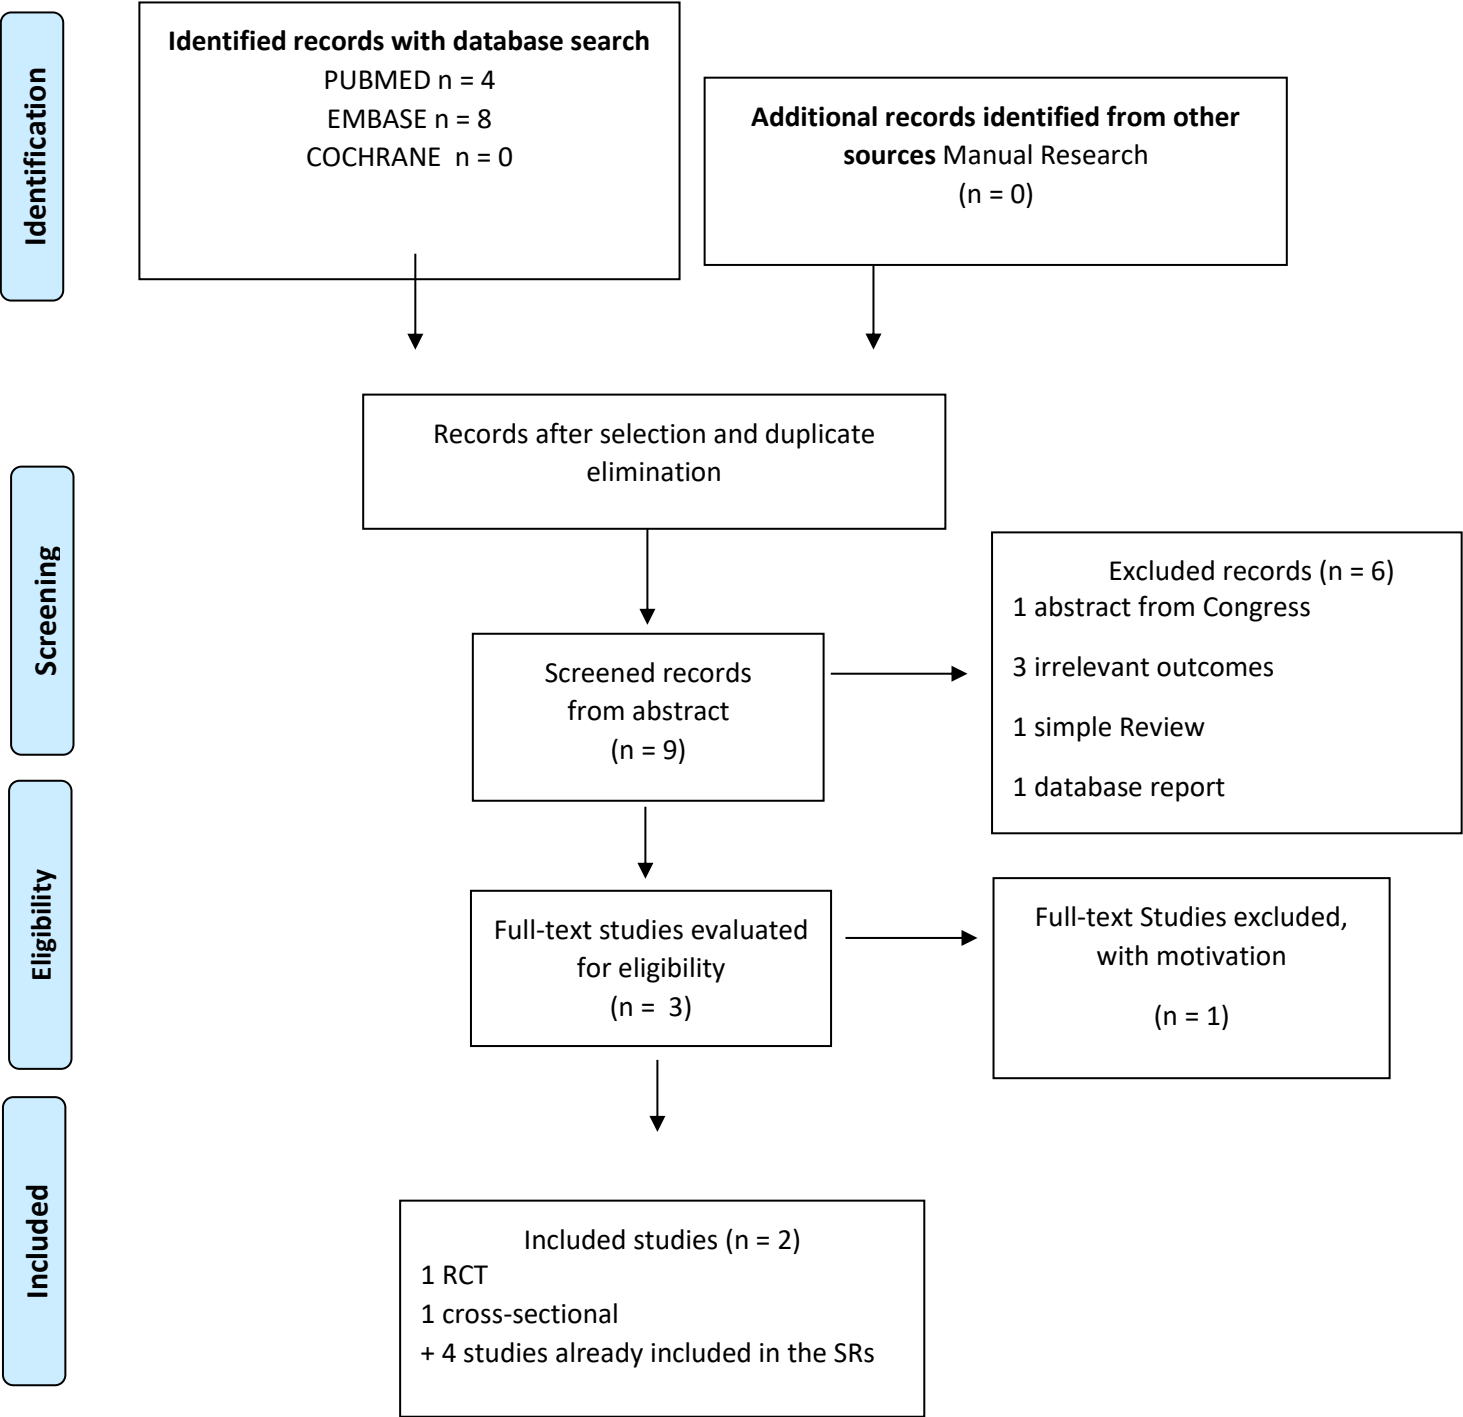

## **RCF/NRCF. Risk of choking**

**P.** In a healthy child aged 6-24 months  
**I.** Different patterns of CF  
**C.** compared with other feeding patterns  
**O.** result in a different risk of choking?

### **KEY WORDS**

#### **Population**

"Infant"[Mesh]  
"Child"[Mesh]  
"Child, Preschool"[Mesh]

#### **Exposure Factors / Comparison**

"responsive feeding"[All Fields]  
"non-responsive feeding"[All Fields]  
"responsiveness"[All Fields]  
"Weaning"[All Fields] O  
"Infant Nutritional Physiological Phenomena"[MeSH]  
"complementary feeding"[All Fields]  
"Feeding Behavior"[All Fields]  
"Foreign Bodies"[Mesh]

#### **Outcomes**

"airway obstruction"[MeSH]  
"sudden airway obstruction"[All Fields]  
"acute airway obstruction"[All Fields]  
"choking"[All Fields]  
"gagging"[MeSH Terms]

### **Guidelines search**

**PUBMED** <https://www.ncbi.nlm.nih.gov/pubmed/>

("airway obstruction"[MeSH] OR "sudden airway obstruction"[All Fields] OR "acute airway obstruction"[All Fields] OR "choking"[All Fields] OR "gagging" OR "Foreign Bodies"[Mesh])  
AND ("2014/09/16"[PDat] : "2021/09/15"[PDat] )

**EMBASE** <https://www.embase.com>

#1

('complementary feeding'/exp OR 'responsiveness' OR 'responsive feeding' OR 'non responsive feeding') AND ('airway obstruction'/exp OR 'choking' OR 'respiratory interruption' OR 'acute

airway obstruction' OR 'sudden airway obstruction')) AND ([infant]/lim OR [preschool]/lim) AND [2014-2021]/py

## **SOCIETY GUIDELINE LINKS:**

National Guideline Clearinghouse (NGC) <https://www.ahrq.gov/gam/index.html>

Canadians Medical Association (CMA) <https://www.cma.ca/clinicalresources/practiceguidelines>

National Guideline Centre (NGC) - National Institute of Health and Care Excellence (NICE)

<https://www.rcplondon.ac.uk/about-us/what-we-do/national-guideline-centre-ngc>

Scottish Intercollegiate Guidelines Network (SIGN) <https://www.sign.ac.uk/our-guidelines.html>

Australian Clinical Practice Guidelines (ACPG) <https://www.clinicalguidelines.gov.au/>

New Zealand Guidelines Group (NZGG) <https://www.health.govt.nz/about-ministry/ministry-health-websites/new-zealand-guidelines-group>

American Academy of Pediatrics (AAP) <https://www.aap.org/en-us/Pages/Default.aspx>

EPA/UNEPSA <http://www.epa-unepsa.org/>

Guidelines International Network <https://g-i-n.net/>

Irish National Clinical Guidelines <https://www.gov.ie/en/collection/c9fa9a-national-clinical-guidelines/>

European Society for Emergency Medicine. Paediatric Section <https://eusem.org/sections-and-committees/sections/paediatric-section>

Society for Academic Emergency Medicine. Pediatric Emergency Medicine

<https://community.saem.org/communities/community-home?CommunityKey=3dc973c2-35fd-42c2-9dcf-99e69a20d206>

Società Italiana di Medicina di Emergenza ed Urgenza Pediatrica SIMEUP <https://www.simeup.it/>

Ministero della Salute Italia [http://www.salute.gov.it/imgs/C\\_17\\_pubblicazioni\\_2618\\_allegato.pdf](http://www.salute.gov.it/imgs/C_17_pubblicazioni_2618_allegato.pdf)

## **Systematic Review search**

### **PUBMED**

#1

("responsive feeding"[All Fields] OR "non-responsive feeding"[All Fields] OR "responsiveness"[All Fields] OR "Weaning"[All Fields] OR "Infant Nutritional Physiological Phenomena"[MeSH] OR "complementary feeding"[All Fields] OR "Feeding Behavior"[All Fields]) AND ("airway obstruction"[MeSH] OR "sudden airway obstruction"[All Fields] OR "acute airway obstruction"[All Fields] OR "choking"[All Fields] OR "gagging")) AND ("2014/09/16"[PDat] : "2021/09/15"[PDat]) AND (systematic[sb] OR Meta-Analysis[ptyp])

#2

((satiety OR hunger OR hungry OR satiat\*) AND (cue OR cues)) OR feeding method\* OR feeding practice\* OR feeding pattern\* OR feeding frequenc\* OR infant feed\* OR feeding behavior\*[tiab] OR feeding style\* OR feeding strategy\*))))

AND ("2014/09/16"[PDat] : "2021/09/15"[PDat] ))))

AND ((systematic[sb] OR Meta-Analysis[ptyp]

AND (((((infant\* OR baby OR babies OR toddler\* OR newborn\*[tiab] OR "Child, Preschool"[Mesh] OR preschool\*[tiab] OR pre-school\*[tiab] OR "early childhood"[tiab] OR early year\*[tiab] OR pre-k[tiab] OR pre-primary[tiab] OR under five\*[ti] OR young child\*[ti] OR prekindergarten[tiab] OR pre-kindergarten[tiab] OR weanling\* OR "first two years" OR "first 2 years"))))))

AND (("airway obstruction"[MeSH] OR "sudden airway obstruction"[All Fields] OR "acute airway obstruction"[All Fields] OR "choking"[All Fields]))

## EMBASE

#1

((('complementary feeding'/exp OR 'responsiveness' OR 'responsive feeding' OR 'non responsive feeding') AND ('airway obstruction'/exp OR 'choking' OR 'respiratory interruption' OR 'acute airway obstruction' OR 'sudden airway obstruction')) AND ([infant]/lim OR [preschool]/lim) AND [2014-2021]/py

## COCHRANE LIBRARY <https://www.cochranelibrary.com>

Cochrane Reviews matching choking OR gagging in Title Abstract Keyword - with Cochrane Library publication date Between Jan 2011 and Jan 2021, in Cochrane Reviews, Trials (Word variations have been searched

## Studies search

### PUBMED

#1

((("responsive feeding"[All Fields] OR "non-responsive feeding"[All Fields] OR "responsiveness"[All Fields] OR "Weaning"[All Fields] OR "Infant Nutritional Physiological Phenomena"[MeSH] OR "complementary feeding"[All Fields] OR "Feeding Behavior"[All Fields]) AND ("airway obstruction"[MeSH] OR "sudden airway obstruction"[All Fields] OR "acute airway obstruction"[All Fields] OR "choking"[All Fields] OR "gagging")) AND (Randomized Controlled Trial[ptyp] OR Pragmatic Clinical Trial[ptyp] OR Observational Study[ptyp] OR Multicenter Study[ptyp] OR Comparative

Study[ptyp] OR Clinical Trial[ptyp] OR Controlled Clinical Trial[ptyp])) AND  
("1979/01/01"[PDat] : "2021/09/15"[PDat] )

#2

((((((((((((((incentiv\* OR indulgen\*[tiab] OR authorita\*[tiab] OR reward\* OR control\* OR  
pressur\* OR restrict\* OR monitor\* OR respons\* OR sooth\*[tiab] OR encourag\* OR  
discourage\* OR uninvolv\* OR disengage\* OR parenting style\* OR laissez-faire OR laissez  
faire\* OR non-respons\* OR nonrespons\* OR force\*) AND (feeding\* OR fed[tiab] OR  
eat[tiab] OR eating))) OR ("Feeding Methods"[Mesh:noexp] OR "Feeding  
Behavior"[Mesh:NoExp] OR ((satiety OR hunger OR hungry OR satiat\*) AND (cue OR  
cues)) OR feeding method\* OR feeding practice\* OR feeding pattern\* OR feeding  
frequenc\* OR infant feed\* OR feeding behavior\*[tiab] OR feeding style\* OR feeding  
strategy\*))))))  
AND ("1979/01/01"[PDat] : "2021/09/15"[PDat] )  
AND Randomized Controlled Trial[ptyp] OR Pragmatic Clinical Trial[ptyp] OR  
Observational Study[ptyp] OR Multicenter Study[ptyp] OR Comparative Study[ptyp] OR  
Clinical Trial[ptyp] OR Controlled Clinical Trial[ptyp]))))  
AND (((infant\* OR baby OR babies OR toddler\* OR newborn\*[tiab] OR "Child,  
Preschool"[Mesh] OR preschool\*[tiab] OR pre-school\*[tiab] OR "early childhood"[tiab]  
OR early year\*[tiab] OR pre-k[tiab] OR pre-primary[tiab] OR under five\*[ti] OR young  
child\*[ti] OR prekindergarten[tiab] OR pre-kindergarten[tiab] OR weanling\* OR "first two  
years" OR "first 2 years"))))  
AND (("airway obstruction"[MeSH] OR "sudden airway obstruction"[All Fields] OR "acute  
airway obstruction"[All Fields] OR "choking"[All Fields]))

#3

((("airway obstruction"[MeSH] OR "sudden airway obstruction"[All Fields] OR "acute  
airway obstruction"[All Fields] OR "choking"[All Fields] OR "gagging"[All Fields]) AND  
(Case Reports[ptyp] OR Clinical Trial[ptyp] OR Comparative Study[ptyp] OR  
Guideline[ptyp] OR Meta-Analysis[ptyp] OR Multicenter Study[ptyp] OR Observational  
Study[ptyp] OR Pragmatic Clinical Trial[ptyp] OR Randomized Controlled Trial[ptyp]))  
AND ("1979/01/01"[PDat] : "2021/09/15"[PDat] )  
AND ("infant"[MeSH Terms])

## EMBASE

#1

((('complementary feeding'/exp OR 'responsiveness' OR 'responsive feeding' OR 'non  
responsive feeding') AND ('airway obstruction'/exp OR 'choking' OR 'respiratory interruption'  
OR 'acute airway obstruction' OR 'sudden airway obstruction')) AND ([infant]/lim OR  
[preschool]/lim) AND [1979-2021]/py

## COCHRANE LIBRARY

Trials matching choking OR gagging in Title Abstract Keyword - with Cochrane Library publication date Between Between Jan 1979 and Jan 2021, in Trials

**Figure S1.p: Guidelines search flow diagram - General Choking.**

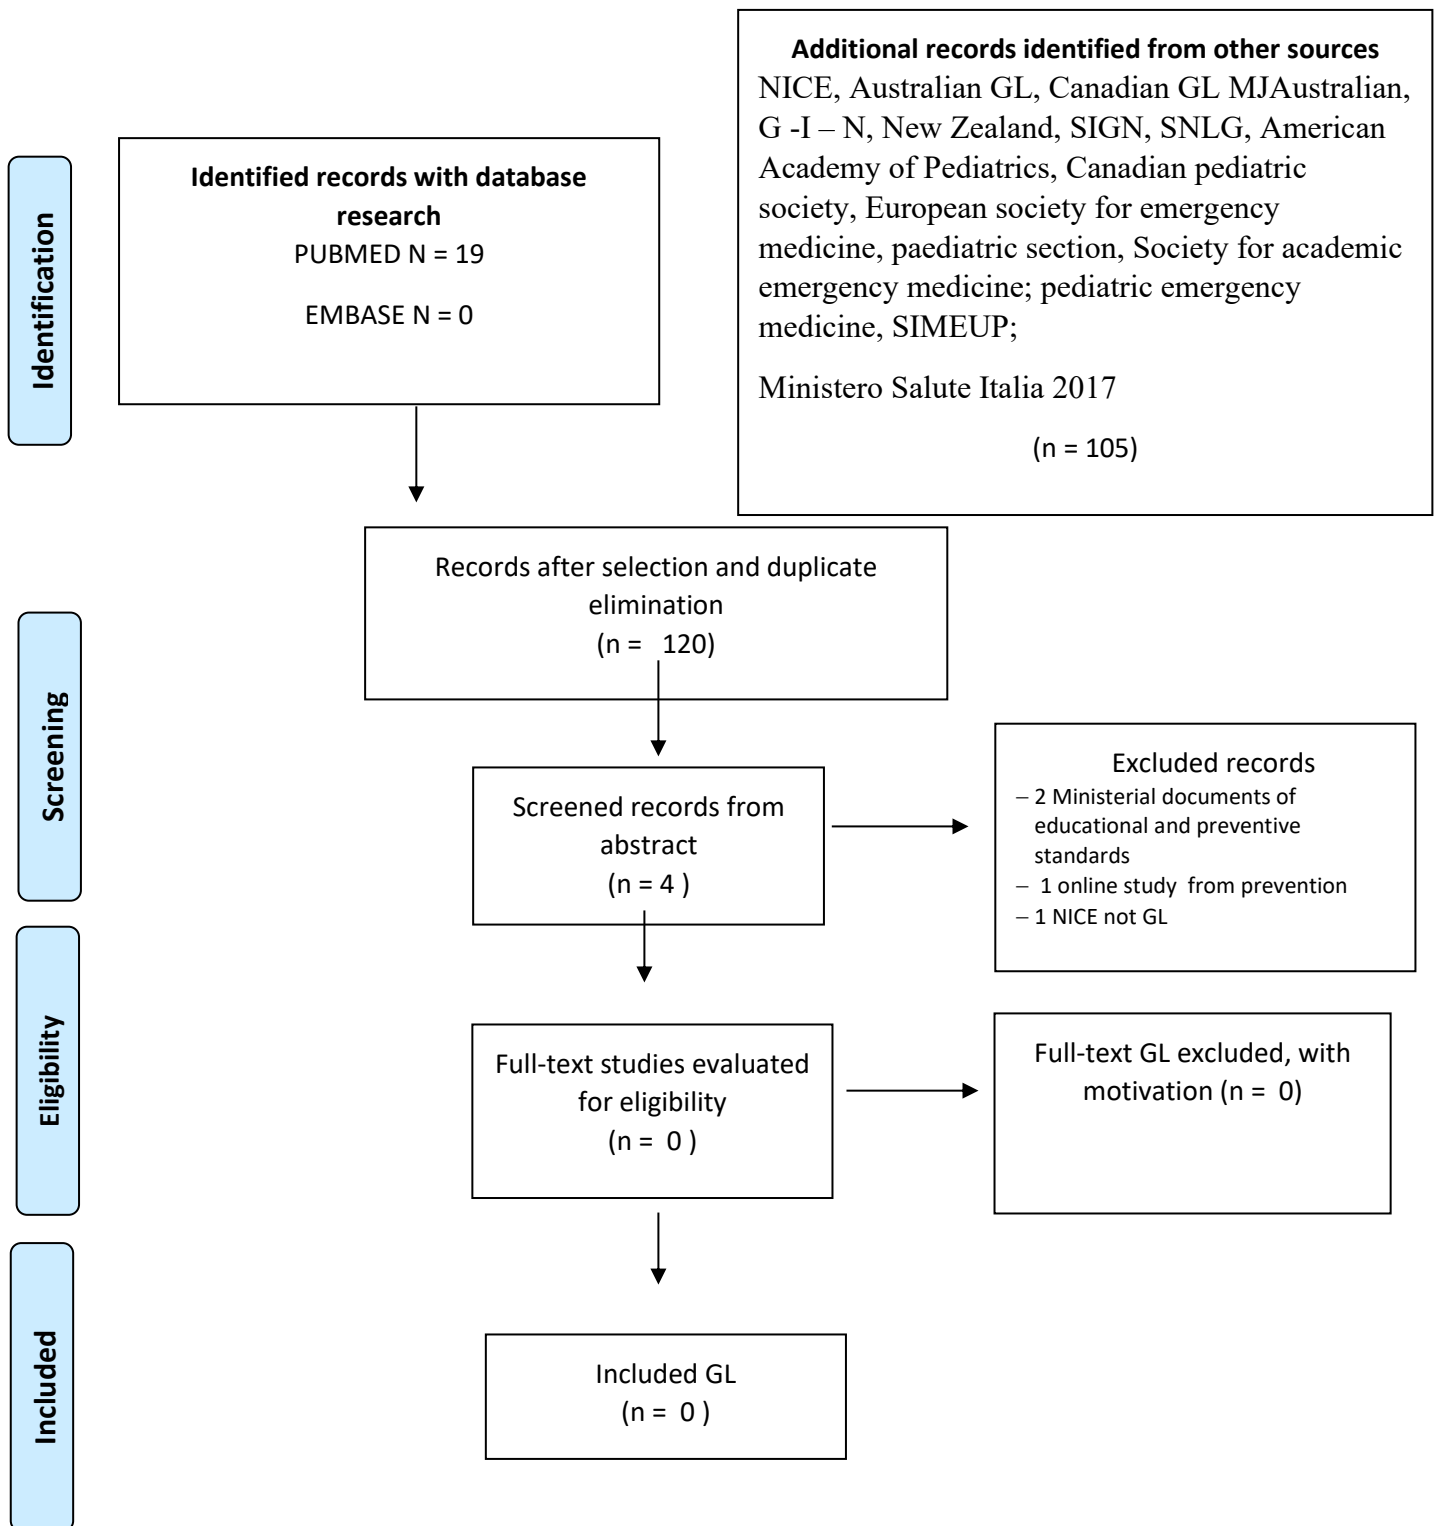

**Figure S1.q: SRs search flow diagram. - General Choking.**

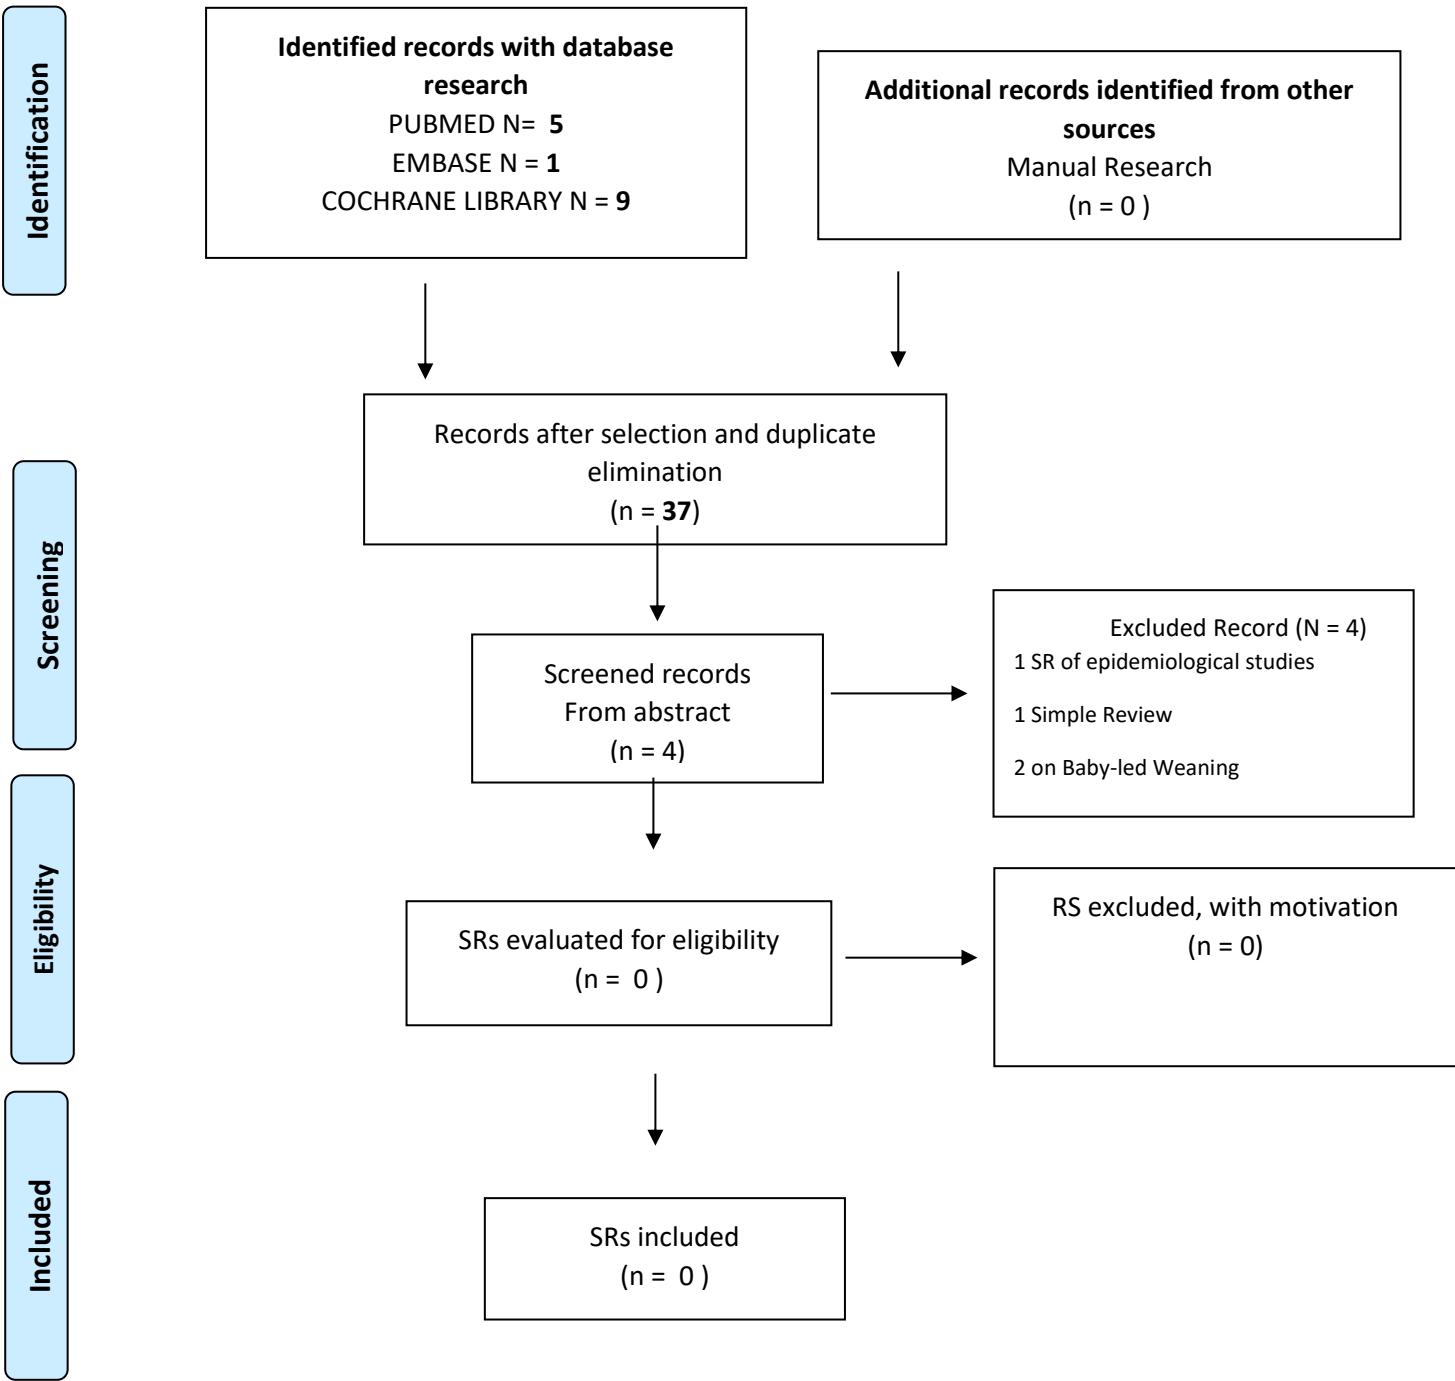



**Figure S1.r: Studies flow diagram – General Choking.**

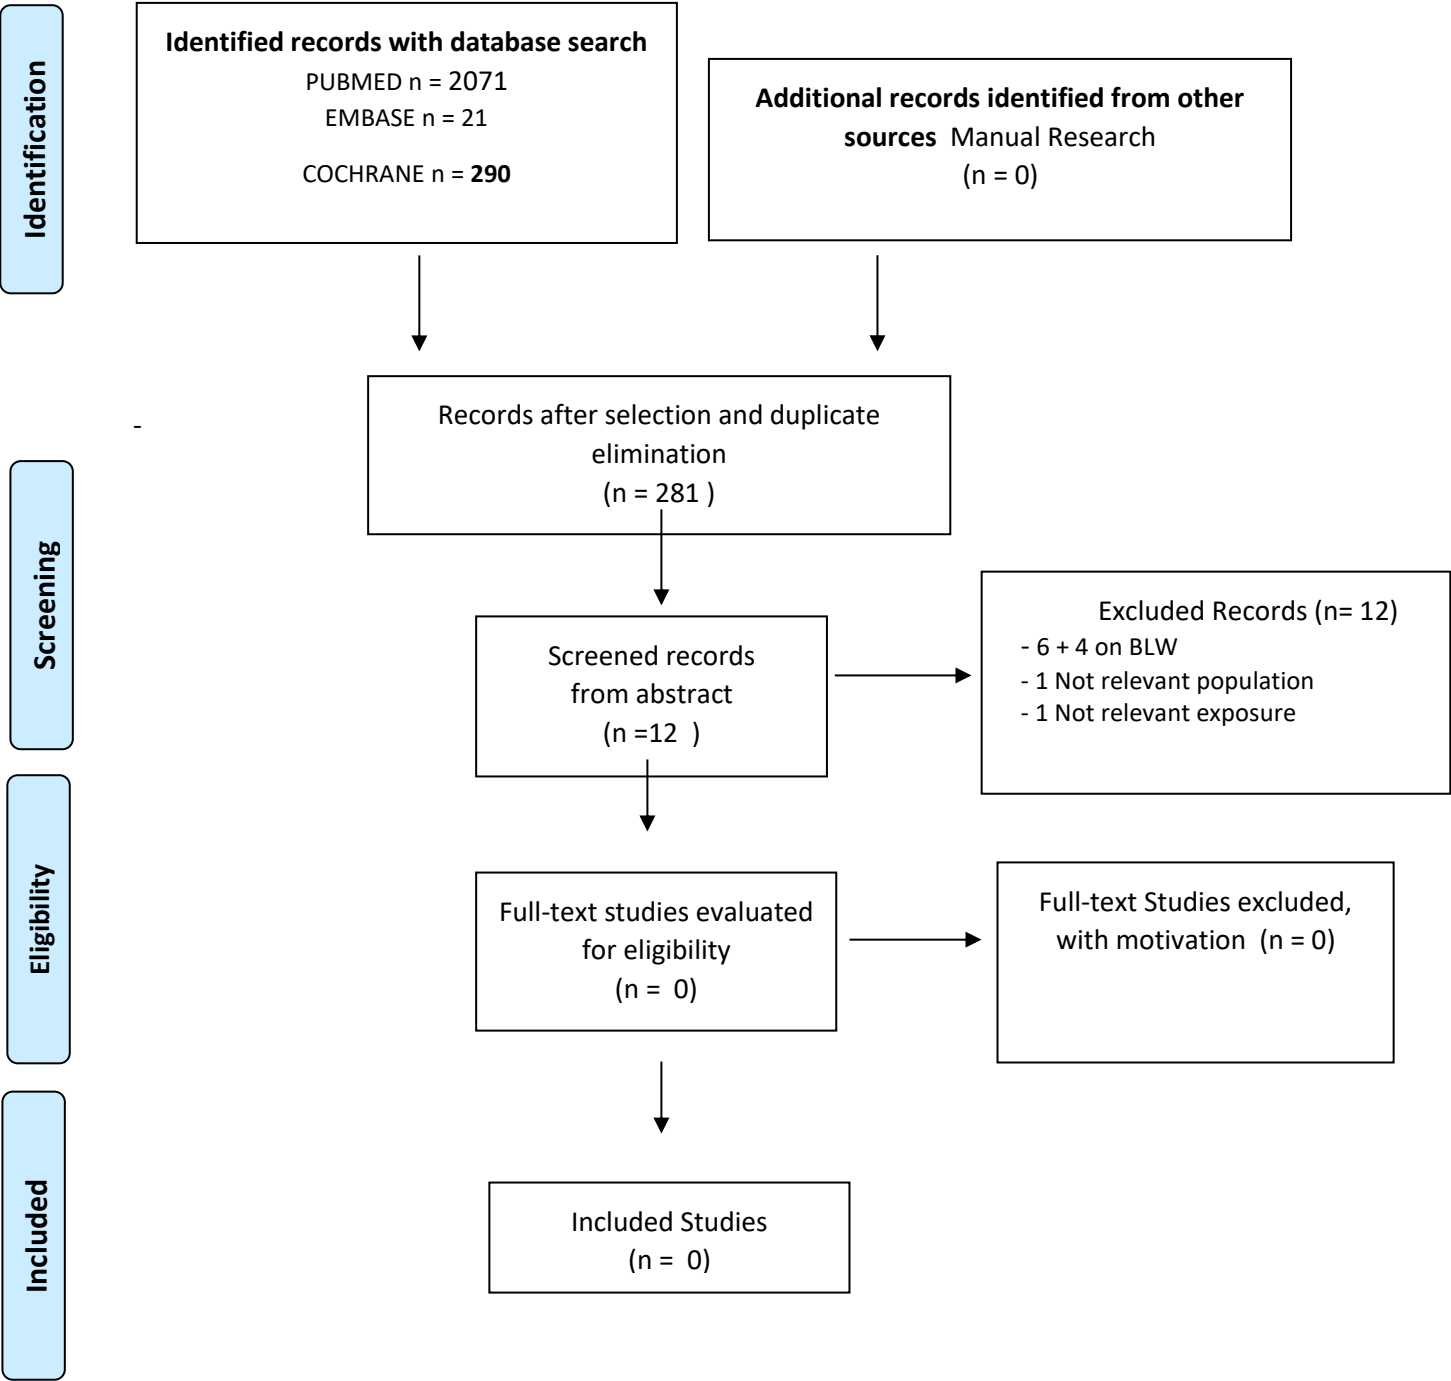

## **RCF/NRCF. Risk of DM2**

*H. Can RCF influence the development of type 2 diabetes mellitus (DM2)?*

*I. Can TCF influence the development of DM2?*

### **PICOs**

**P** In a healthy infant

**I** responsive complementary feeding during the period of Complementary Feeding

**C** compared to traditional complementary feeding during the Complementary Feeding period

**O** does it result in a different risk of developing type 2 diabetes mellitus at later ages?

### **KEY WORDS**

#### **Population**

[infant]/lim

[child]/lim

[preschool]/lim

[adolescent]/lim

#### **Exposure Factors / Comparison**

"responsive feeding"[All Fields]

"non-responsive feeding"[All Fields]

"responsiveness"[All Fields]

"Weaning"[All Fields]

"Infant Nutritional Physiological Phenomena"[MeSH]

"complementary feeding"[All Fields]

"Feeding Behavior"[All Fields])

#### **Outcomes**

"Diabetes Mellitus"[Mesh]

"Glucose Intolerance"[Mesh]

"Hyperglycemia"[Mesh]

### **Guidelines search**

#### **SOCIETY GUIDELINE LINKS:**

National Guideline Clearinghouse (NGC) <https://www.ahrq.gov/gam/index.html>

Canadians Medical Association (CMA) <https://www.cma.ca/clinicalresources/practiceguidelines>

National Guideline Centre (NGC) - National Institute of Health and Care Excellence (NICE)  
<https://www.rcplondon.ac.uk/about-us/what-we-do/national-guideline-centre-ngc>

Scottish Intercollegiate Guidelines Network (SIGN) <https://www.sign.ac.uk/our-guidelines.html>

Australian Clinical Practice Guidelines (ACPG) <https://www.clinicalguidelines.gov.au/>

New Zealand Guidelines Group (NZGG) <https://www.health.govt.nz/about-ministry/ministry-health-websites/new-zealand-guidelines-group>

American Academy of Pediatrics (AAP) <https://www.aap.org/en-us/Pages/Default.aspx>

European Paediatric Association/Union of National European Paediatric Societies and Associations  
EPA/UNEPSA <http://www.epa-une psa.org/>

Guidelines International Network <https://g-i-n.net/>

Società Italiana di Pediatria (SIP) <http://www-sip.it/>

Società Italiana di Pediatria Preventiva e Sociale (SIPPS) <https://www.sipps.it/>

Società Italiana di Endocrinologia e Diabetologia Pediatrica (SIEDP)  
<http://www.siedp.it/pagina/84/linee+guida%2C+raccomandazioni+e+consensus>

American Diabetes Association <https://www.diabetes.org/>

Canadian Diabetes Association - <https://rarediseases.org/organizations/canadian-diabetes-association/> - <https://guidelines.diabetes.ca/>

Association of Children's Diabetes Clinicians <http://www.a-c-d-c.org/>

International Society for Pediatric and Adolescent Diabetes (ISPAD) <https://www.ispad.org/>

## **PUBMED**

#1

("Diabetes Mellitus"[Mesh] OR "Diabetes Mellitus/prevention and control"[Mesh] OR "Glucose Intolerance"[Mesh]) OR "Hyperglycemia"[Mesh]) AND ((Practice Guideline[ptyp] OR Guideline[ptyp]) AND "2014/09/15"[PDat] : "2021/09/15"[PDat] AND ("infant"[MeSH Terms] OR "child, preschool"[MeSH Terms] OR [adolescent]/lim))

#2

("Diabetes Mellitus"[Mesh] OR "Diabetes Mellitus/prevention and control"[Mesh] OR "Glucose Intolerance"[Mesh]) OR "Hyperglycemia"[Mesh]) AND (("responsive feeding"[All Fields] OR "non-responsive feeding"[All Fields] OR "responsiveness"[All Fields] OR "Weaning"[All Fields] OR "Infant Nutritional Physiological Phenomena"[MeSH] OR "complementary feeding"[All Fields] OR "Feeding Behavior"[All Fields]) OR ("self-weaning"[All Fields] OR "self weaning"[All Fields] OR "baby led weaning"[All Fields] OR "baby-led weaning"[All Fields])) AND ((Practice Guideline[ptyp] OR Guideline[ptyp]) AND "2014/09/15"[PDat] : "2021/09/15"[PDat])

## **EMBASE**

#1

('diabetes mellitus'/exp OR 'hyperglycemia'/exp) AND ('complementary feeding'/exp OR 'weaning'/exp OR 'baby led weaning'/exp OR 'baby led weaning' OR 'baby led' OR 'weaning'/exp OR weaning OR 'self weaning' OR autoweaning' OR "responsiveness" OR "responsive feeding" OR "non responsive feeding") AND [2014-2021]/py AND ([adolescent]/lim OR [child]/lim OR [preschool]/lim OR [school]/lim OR [young adult]/lim) AND 'practice guideline'/de

## **Systematic Reviews search**

### **COCHRANE LIBRARY**

"Diabetes mellitus" in Title Abstract Keyword

Custom date range Topics: 15.09.2014-15.09/2021

### **EMBASE**

#1

('diabetes mellitus'/exp OR 'hyperglycemia'/exp) AND ('complementary feeding'/exp OR 'weaning'/exp OR "responsiveness" OR "responsive feeding" OR "non responsive feeding") AND [2009-2021]/py AND ([adolescent]/lim OR [child]/lim OR [preschool]/lim OR [school]/lim OR [young adult]/lim) AND ('meta analysis'/de OR 'systematic review'/de)

### **PUBMED**

#1

((("Diabetes Mellitus"[Mesh] OR "Diabetes Mellitus/prevention and control"[Mesh] OR "Glucose Intolerance"[Mesh]) OR "Hyperglycemia"[Mesh]) AND (("responsive feeding"[All Fields] OR "non-responsive feeding"[All Fields] OR "responsiveness"[All Fields] OR "Weaning"[All Fields] OR "Infant Nutritional Physiological Phenomena"[MeSH] OR "complementary feeding"[All Fields] OR "Feeding Behavior"[All Fields]) AND ((Meta-Analysis[ptyp] OR systematic[sb]) AND "2009/09/15"[PDat] : 2021/09/15 [PDat] AND ("infant"[MeSH Terms] OR "child"[MeSH Terms] OR "adolescent"[MeSH Terms])))

## **Studies search**

### **PUBMED**

#1

((("Diabetes Mellitus"[Mesh] OR "Diabetes Mellitus/prevention and control"[Mesh] OR "Glucose Intolerance"[Mesh]) OR "Hyperglycemia"[Mesh]) AND (("responsive feeding"[All Fields] OR "non-responsive feeding"[All Fields] OR "responsiveness"[All Fields] OR "Weaning"[All Fields] OR "Infant Nutritional Physiological Phenomena"[MeSH] OR "complementary feeding"[All Fields] OR "Feeding Behavior"[All Fields]) AND ((Clinical Trial[ptyp] OR Comparative Study[ptyp] OR Controlled Clinical Trial[ptyp] OR Multicenter Study[ptyp] OR Observational Study[ptyp] OR Pragmatic Clinical Trial[ptyp] OR Randomized Controlled Trial[ptyp]) AND ("infant"[MeSH Terms] OR "child"[MeSH Terms] OR "adolescent"[MeSH Terms])) AND ("1979/01/01"[PDat] : "2021/09/15"[PDat] )

## **EMBASE**

#1

('diabetes mellitus'/exp OR 'hyperglycemia'/exp) AND ('complementary feeding'/exp OR 'weaning'/exp OR "responsiveness" OR "responsive feeding" OR "non responsive feeding") AND ('clinical trial'/de OR 'cohort analysis'/de OR 'comparative study'/de OR 'controlled clinical trial'/de OR 'controlled study'/de OR 'cross-sectional study'/de OR 'multicenter study'/de OR 'observational study'/de OR 'prospective study'/de OR 'randomized controlled trial'/de OR 'retrospective study'/de) AND ([adolescent]/lim OR [child]/lim OR [infant]/lim OR [preschool]/lim OR [school]/lim OR [young adult]/lim) AND [1979-2021]/py

## **COCHRANE LIBRARY**

“Diabetes mellitus” in Title Abstract Keyword between Jan 1979 and Jan 2021, in Trials

**Figure S1s: Guidelines search flow diagram. Responsive and non-responsive complementary feeding and DM2 development**

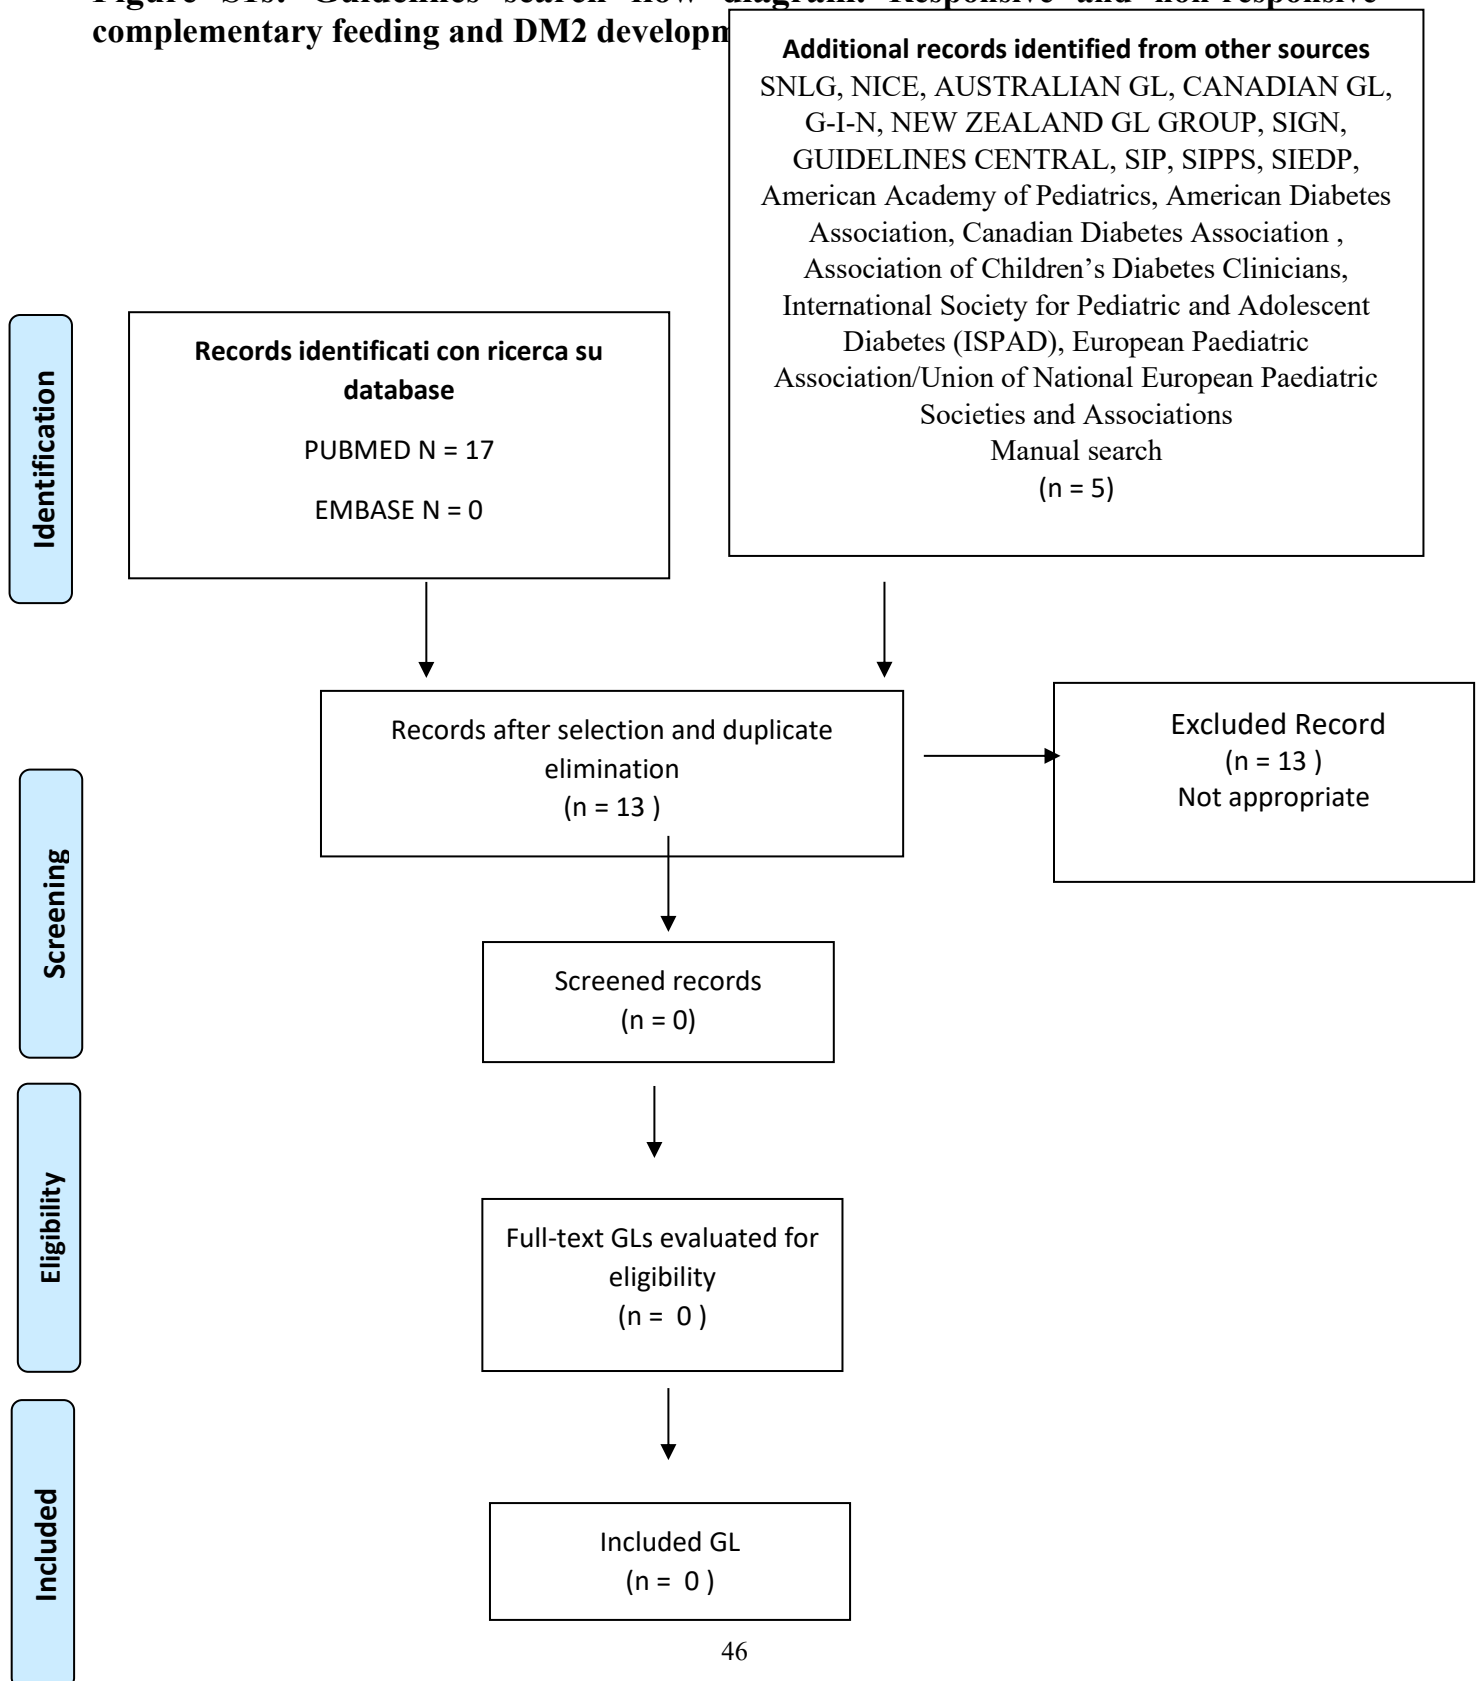

**Figure S1t: SRs search flow diagram. Responsive and non-responsive complementary feeding and DM2 development.**

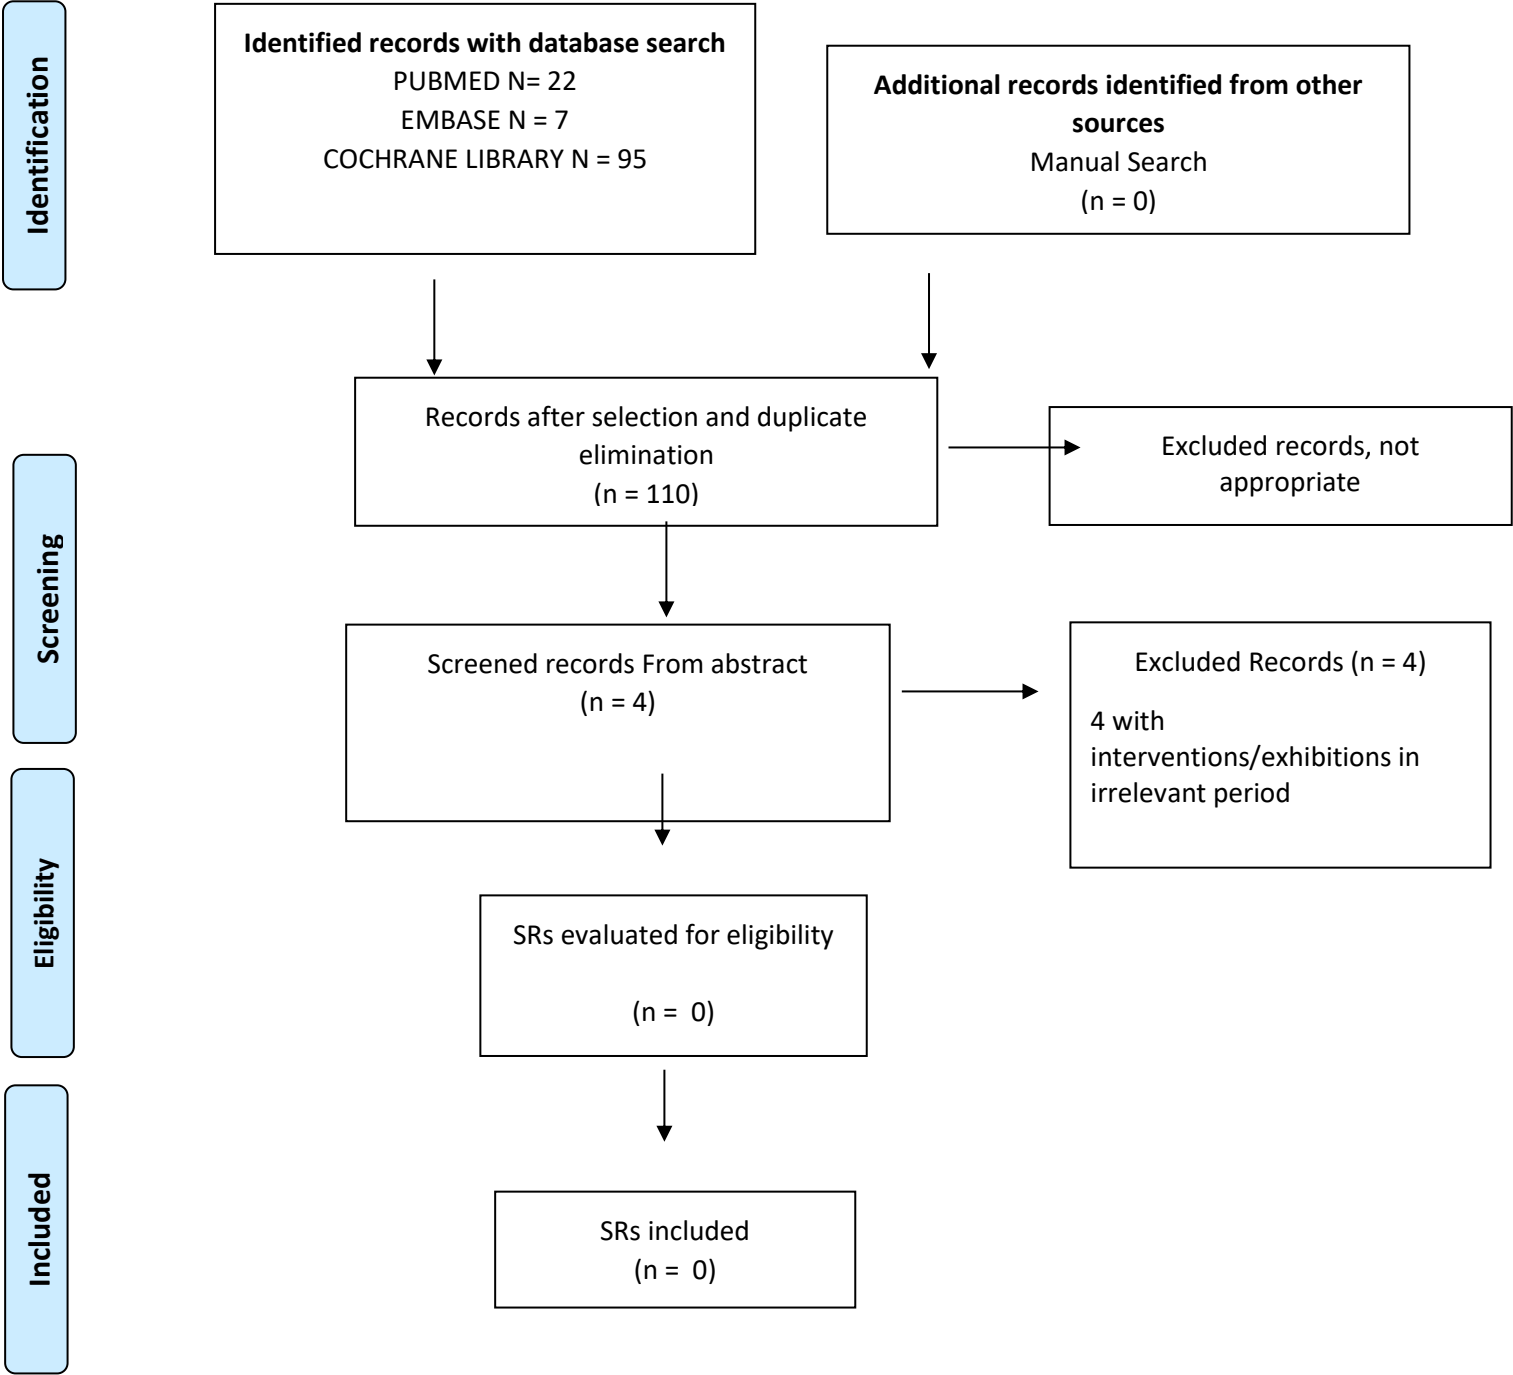

**Figure S1u: Studies flow diagram. Responsive and non-responsive complementary feeding and DM2 development.**

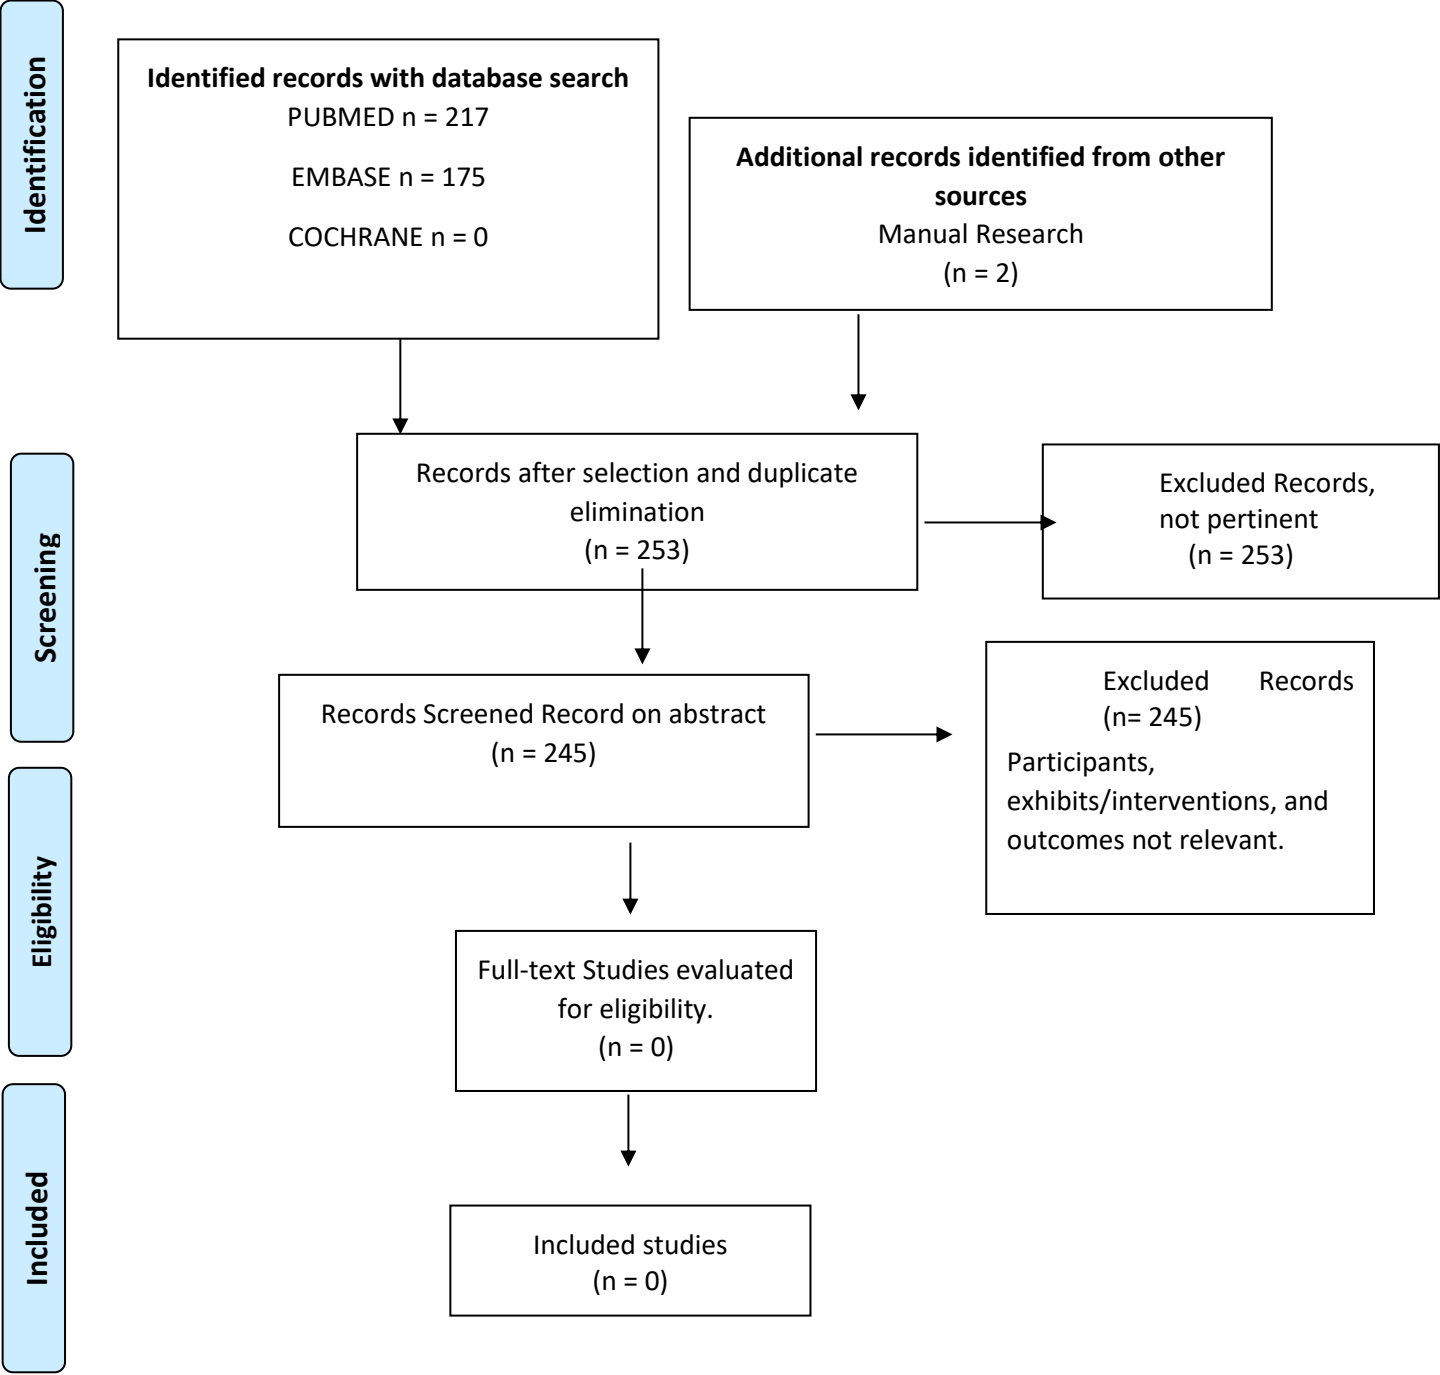



## **RCF/NRCF. Hypertension.**

**J.**     *Can RCF influence the development of hypertension?*

**K.**     *Can TCF influence the development of hypertension?*

### **PICOs**

**P** In a healthy infant

**I** responsive complementary feeding during the Complementary Feeding period

**C** compared to traditional complementary feeding during the period of Complementary Feeding

**O** results in a different risk of developing Hypertension at later ages?

### **KEY WORDS**

#### **Population**

[infant]/lim

[child]/lim

[preschool]/lim

[adolescent]/lim

#### **Exposure Factors / Comparison**

"responsive feeding"[All Fields]

"non-responsive feeding"[All Fields]

"responsiveness"[All Fields]

"Weaning"[All Fields]

"Infant Nutritional Physiological Phenomena"[MeSH]

"complementary feeding"[All Fields]

"Feeding Behavior"[All Fields])

"Risk"[Mesh]

"Primary Prevention"[Mesh]

"prevention and control" [Subheading]

OR ("self-weaning"[All Fields] OR "self weaning"[All Fields] OR "baby led weaning"[All Fields]

OR "baby-led weaning"[All Fields]))

#### **Outcomes**

"Hypertension"[Mesh]

"arterial hypertension"[All Fields]

"elevated blood pressure"[All Fields])

## Guidelines search

### SOCIETY GUIDELINE LINKS:

National Guideline Clearinghouse (NGC) <https://www.ahrq.gov/gam/index.html>  
Canadians Medical Association (CMA) <https://www.cma.ca/clinicalresources/practiceguidelines>  
National Guideline Centre (NGC) - National Institute of Health and Care Excellence (NICE)  
<https://www.rcplondon.ac.uk/about-us/what-we-do/national-guideline-centre-ngc>  
Scottish Intercollegiate Guidelines Network (SIGN) <https://www.sign.ac.uk/our-guidelines.html>  
Australian Clinical Practice Guidelines (ACPG) <https://www.clinicalguidelines.gov.au/>  
New Zealand Guidelines Group (NZGG) <https://www.health.govt.nz/about-ministry/ministry-health-websites/new-zealand-guidelines-group>  
American Academy of Pediatrics (AAP) <https://www.aap.org/en-us/Pages/Default.aspx>  
EPA/UNEPSA <http://www.epa-une psa.org/>  
Guidelines International Network <https://g-i-n.net/>  
Società Italiana di Pediatria (SIP) <http://www-sip.it/>  
Società Italiana di Pediatria Preventiva e Sociale (SIPPS) <https://www.sipps.it/>  
European Society of Hypertension (ESH) <https://www.eshonline.org/>  
Hypertension Canada <https://hypertension.ca/>  
Japanese Society of Hypertension (JSH) [https://www.jpns.jp/index\\_e.html](https://www.jpns.jp/index_e.html)

### PUBMED

#1

("Hypertension"[Mesh] OR "arterial hypertension"[All Fields] OR "elevated blood pressure"[All Fields]) AND ("Risk"[Mesh] OR ("Primary Prevention"[Mesh]) OR "prevention and control"[Subheading]) AND ((Guideline[ptyp] OR Practice Guideline[ptyp]) AND ("infant"[MeSH Terms] OR "child"[MeSH Terms] OR "adolescent"[MeSH Terms])) AND "2014/09/15"[PDat] : "2021/09/15"[PDat]

#2

"Hypertension"[Mesh] OR "arterial hypertension"[All Fields] OR "elevated blood pressure"[All Fields] AND ("responsive feeding"[All Fields] OR "non-responsive feeding"[All Fields] OR "responsiveness"[All Fields] OR "Weaning"[All Fields] OR "Infant Nutritional Physiological Phenomena"[MeSH] OR "complementary feeding"[All Fields] OR "Feeding Behavior"[All Fields]) AND ((Guideline[ptyp] OR Practice Guideline[ptyp]) AND "2014/09/15"[PDat] : "2021/09/15"[PDat])

### EMBASE

#1

('hypertension'/exp OR 'blood pressure'/exp OR 'elevated blood pressure'/exp) AND ('complementary feeding'/exp OR 'weaning'/exp OR weaning OR 'responsiveness' OR 'responsive feeding' OR 'non responsive feeding') AND [2014-2021]/py AND ([adolescent]/lim OR [child]/lim OR [infant]/lim OR [preschool]/lim OR [school]/lim OR [young adult]/lim) AND 'practice guideline'/de

#2

('hypertension'/exp OR 'blood pressure'/exp OR 'elevated blood pressure'/exp) AND [2014-2021]/py AND 'practice guideline'/de AND ([adolescent]/lim OR [child]/lim OR [infant]/lim OR [preschool]/lim OR [school]/lim)

## **Systematic Reviews search**

### **COCHRANE LIBRARY**

“Hypertension” in Title Abstract Keyword

Custom date range Topics: 15.09.2014-15.09/2021

### **EMBASE**

#1

('hypertension'/exp OR 'blood pressure'/exp OR 'elevated blood pressure'/exp) AND ('complementary feeding'/exp OR 'weaning'/exp OR weaning OR 'responsiveness' OR 'responsive feeding' OR 'non responsive feeding') AND ([cochrane review]/lim OR [systematic review]/lim OR [meta analysis]/lim) AND [2009-2021]/py AND ([adolescent]/lim OR [child]/lim OR [infant]/lim OR [preschool]/lim OR [school]/lim OR [young adult]/lim)

### **PUBMED**

#1

("Hypertension"[Mesh] OR "arterial hypertension"[All Fields] OR "elevated blood pressure"[All Fields] AND ("responsive feeding"[All Fields] OR "non-responsive feeding"[All Fields] OR "responsiveness"[All Fields] OR "Weaning"[All Fields] OR "Infant Nutritional Physiological Phenomena"[MeSH] OR "complementary feeding"[All Fields] OR "Feeding Behavior"[All Fields]) AND ((Meta-Analysis[ptyp] OR systematic[sb]) AND "2009/09/09"[PDat] : "2021/09/15"[PDat] AND ("infant"[MeSH Terms] OR "child"[MeSH Terms] OR "adolescent"[MeSH Terms]))

## Studies search

### PUBMED

#1

"Hypertension"[Mesh] OR "arterial hypertension"[All Fields] OR "elevated blood pressure"[All Fields] AND ("responsive feeding"[All Fields] OR "non-responsive feeding"[All Fields] OR "responsiveness"[All Fields] OR "Weaning"[All Fields] OR "Infant Nutritional Physiological Phenomena"[MeSH] OR "complementary feeding"[All Fields] OR "Feeding Behavior"[All Fields]) AND ((Clinical Study[ptyp] OR Clinical Trial[ptyp] OR Comparative Study[ptyp] OR Controlled Clinical Trial[ptyp] OR Multicenter Study[ptyp] OR Observational Study[ptyp] OR Pragmatic Clinical Trial[ptyp] OR Randomized Controlled Trial[ptyp]) AND ("infant"[MeSH Terms] OR "child"[MeSH Terms] OR "adolescent"[MeSH Terms])) AND ("1979/01/01"[PDat] : "2021/09/15"[PDat] )

### EMBASE

#1

('hypertension'/exp OR 'blood pressure'/exp OR 'elevated blood pressure'/exp) AND ('complementary feeding'/exp OR 'weaning'/exp OR weaning OR 'responsiveness' OR 'responsive feeding' OR 'non responsive feeding') AND ('clinical study'/de OR 'clinical trial'/de OR 'cohort analysis'/de OR 'comparative effectiveness'/de OR 'comparative study'/de OR 'controlled clinical trial'/de OR 'controlled study'/de OR 'cross-sectional study'/de OR 'double blind procedure'/de OR 'multicenter study'/de OR 'observational study'/de OR 'prospective study'/de OR 'randomized controlled trial'/de OR 'randomized controlled trial (topic)'/de OR 'retrospective study'/de) AND ([adolescent]/lim OR [child]/lim OR [infant]/lim OR [preschool]/lim OR [school]/lim OR [young adult]/lim) AND [1979-2021]/py

## COCHRANE

**Hypertension** in Title Abstract Keyword - in Trials with 'Child Health' in Cochrane Groups (Word variations have been searched) from Jan 1979 and Jan 2021, in Trials

**Figure S1.v: Guidelines search flow diagram. Responsive and Non-Responsive Complementary Feeding. Hypertension.**

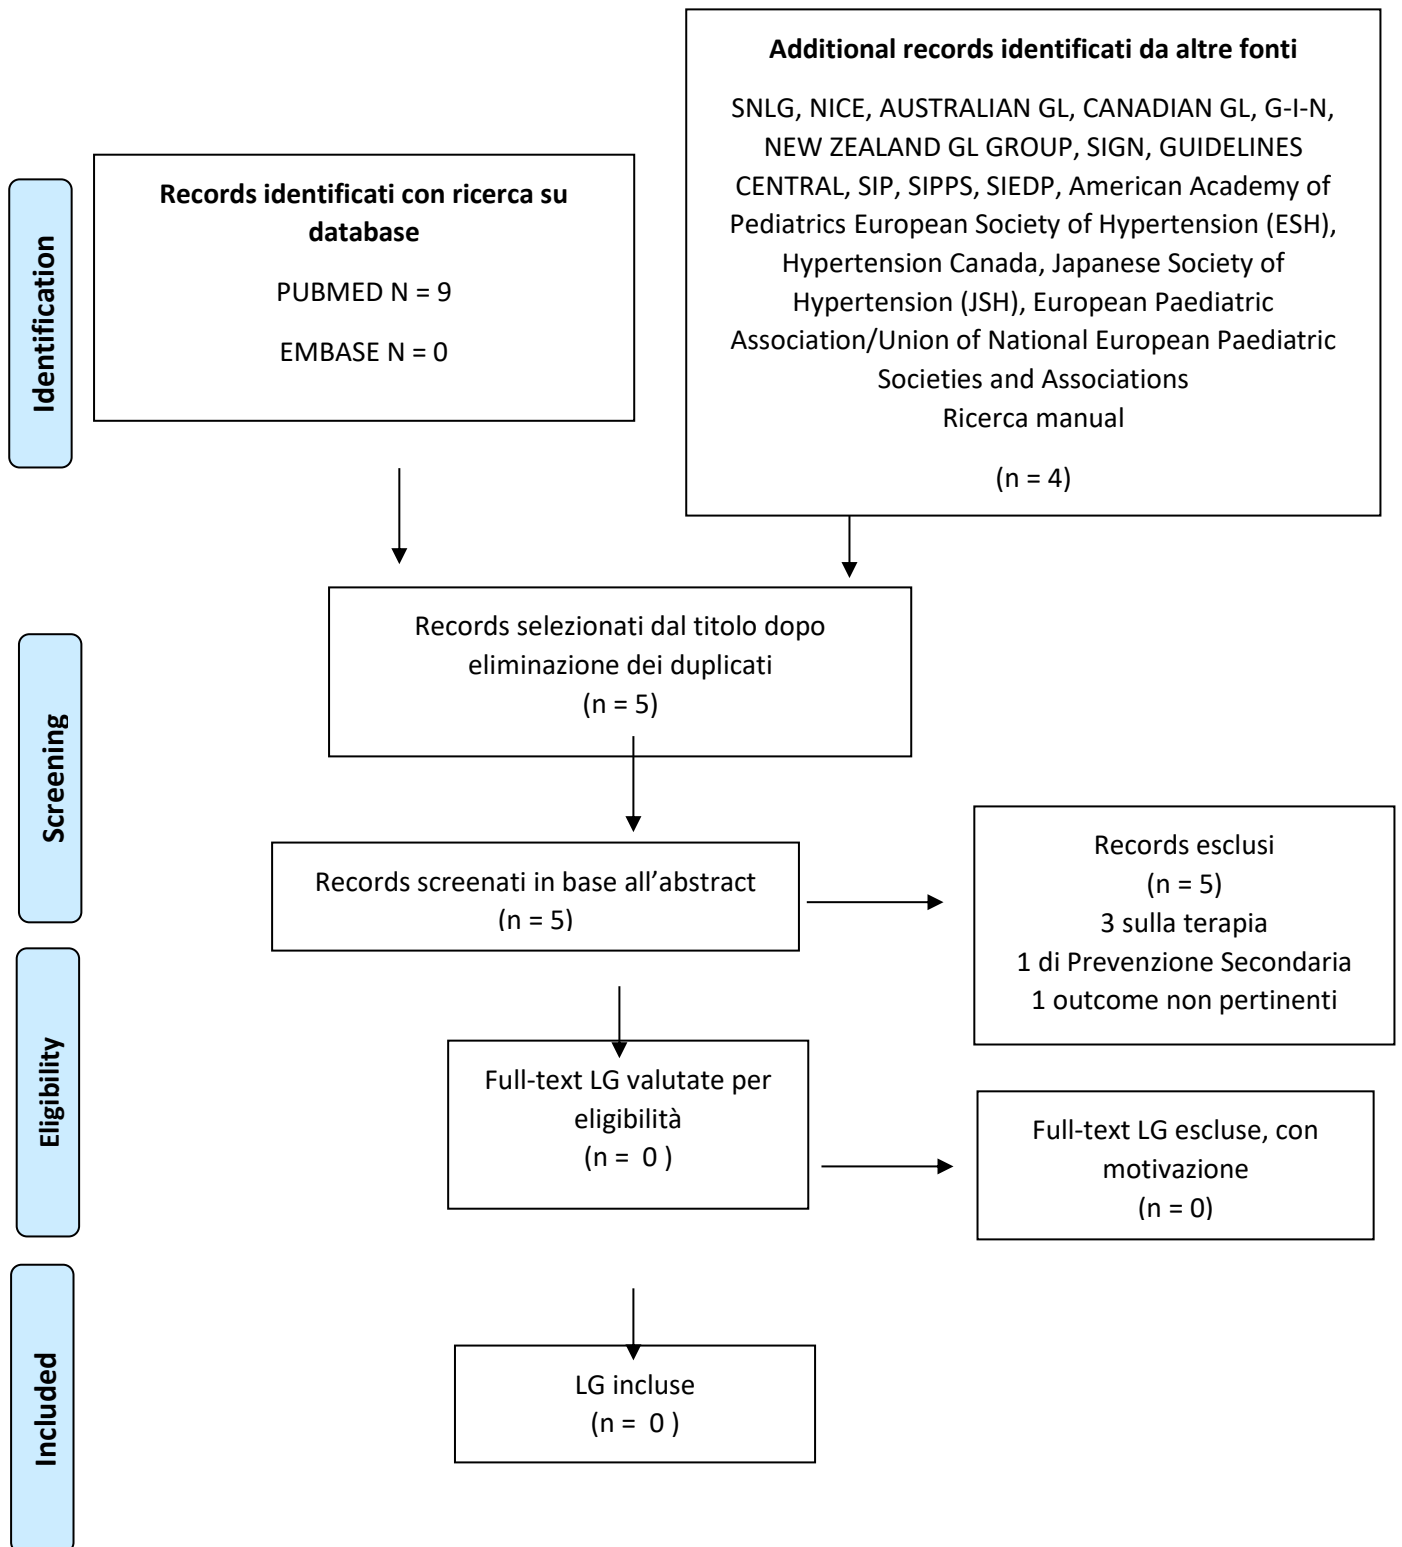

**Figure S1.w: SRs search flow diagram. Responsive and Non-Responsive Complementary Feeding. Hypertension.**

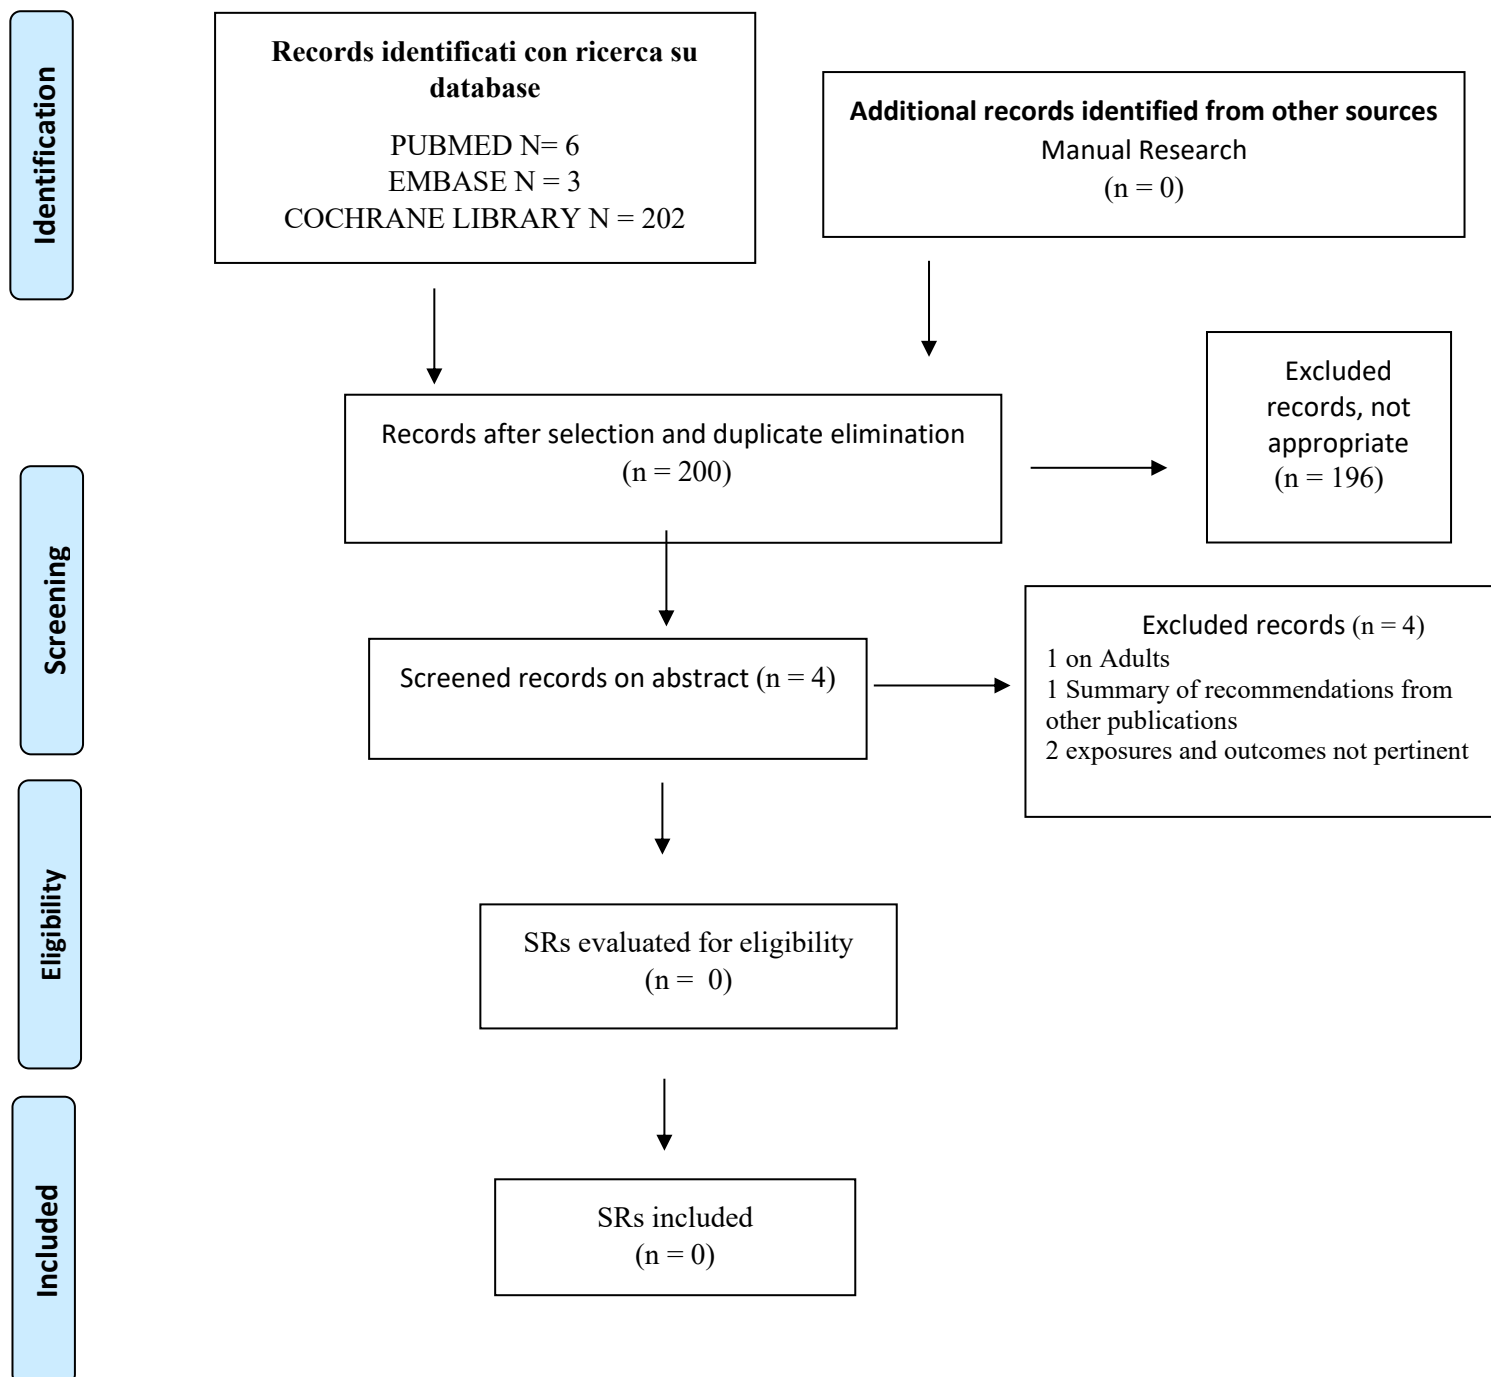

**Figure S1.x: Studies flow diagram. Responsive and Non-Responsive Complementary Feeding. Hypertension.**

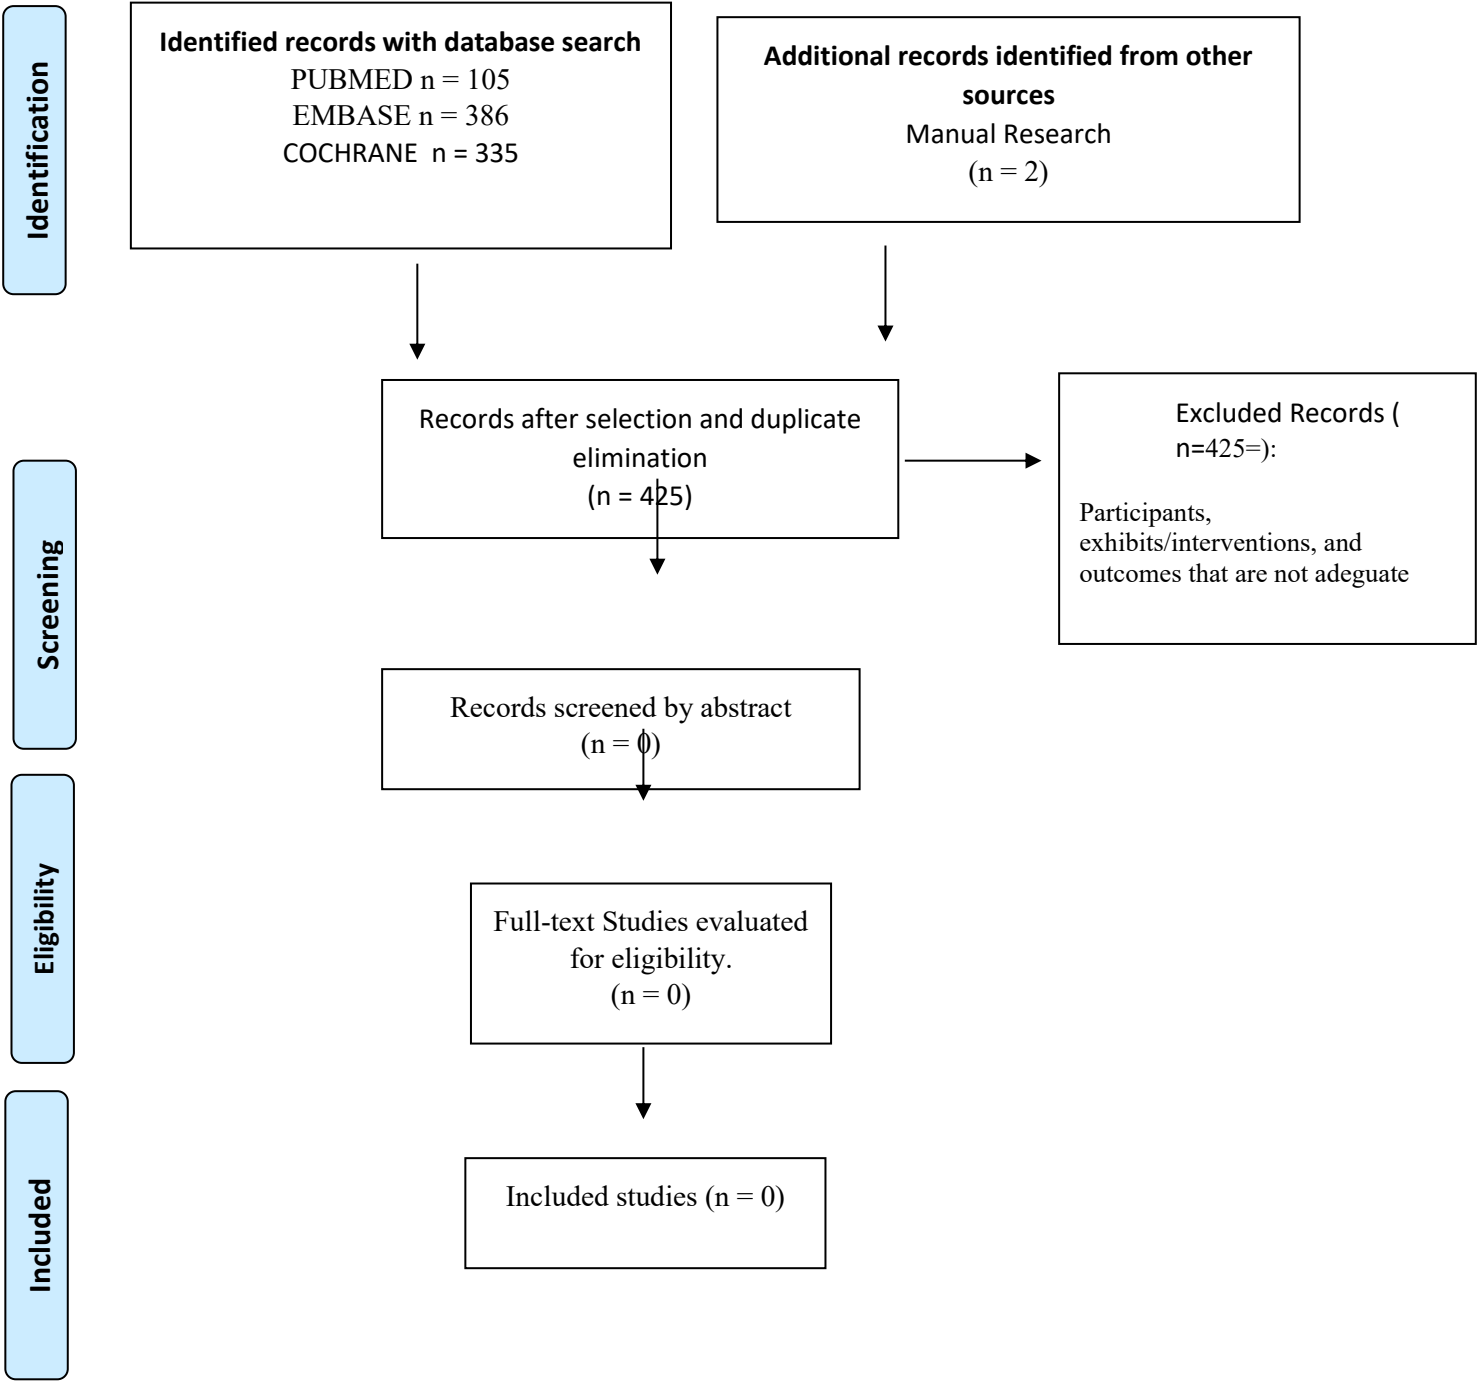



## **Responsive and traditional complementary feeding. Caries.**

***K. Can RCF influence the development of dental caries?***

***L. Can TCF influence the development of dental caries?***

### **PICOs**

**P** In the healthy infant

**I** responsive complementary feeding

**C** compared with traditional complementary feeding

**O** results in a different risk of developing dental caries in later ages?

### **KEY WORDS**

#### **Population**

"infant"[MeSH Terms]

"child"[MeSH Terms]

"adolescent"[MeSH Terms]

#### **Exposure Factors / Comparison**

"responsive feeding"[All Fields]

"non-responsive feeding"[All Fields]

"responsiveness"[All Fields]

"Weaning"[All Fields] OR

"Infant Nutritional Physiological Phenomena"[MeSH]

"complementary feeding"[All Fields]

"Feeding Behavior"[All Fields])

#### **Outcomes**

"Dental Caries"[Mesh])

"DMF Index"[Mesh]

### **Guidelines search**

"caries"

"caries children"

### **Official sites of scientific or institutional societies**

Società Italiana Odontoiatria Infantile <https://www.sioi.it/>

Ministero della Salute. Italia.

[https://www.salute.gov.it/portale/news/p3\\_2\\_1.jsp?lingua=italiano&menu=notizie&area=Sorriso%20salute](https://www.salute.gov.it/portale/news/p3_2_1.jsp?lingua=italiano&menu=notizie&area=Sorriso%20salute)

American Academy of Pediatric Dentistry <https://www.aapd.org/>

American Academy of Pediatrics (AAP) <https://www.aap.org/en-us/Pages/Default.aspx>

## **SOCIETY GUIDELINE LINKS:**

National Guideline Clearinghouse (NGC) <https://www.ahrq.gov/gam/index.html>  
Canadians Medical Association (CMA) <https://www.cma.ca/clinicalresources/practiceguidelines>  
National Guideline Centre (NGC) - National Institute of Health and Care Excellence (NICE)  
<https://www.rcplondon.ac.uk/about-us/what-we-do/national-guideline-centre-ngc>  
Scottish Intercollegiate Guidelines Network (SIGN) <https://www.sign.ac.uk/our-guidelines.html>  
Australian Clinical Practice Guidelines (ACPG) <https://www.clinicalguidelines.gov.au/>  
New Zealand Guidelines Group (NZGG) <https://www.health.govt.nz/about-ministry/ministry-health-websites/new-zealand-guidelines-group>  
EPA/UNEPSA <http://www.epa-unep.org/>  
Guidelines International Network <https://g-i-n.net/>

## **PUBMED**

#1

((("DMF Index"[Mesh] OR "Dental Caries"[Mesh]) OR "Dental Caries Susceptibility"[Mesh] OR "early childhood caries"[All Fields] OR "ECC"[All Fields]) OR "caries prevention" OR "dental caries prevention" OR "dental caries risk" OR "dental caries children" AND ("child"[MeSH Terms] OR "child"[All Fields] OR "children"[All Fields])) AND ((Guideline[ptyp] OR Practice Guideline[ptyp]) AND "2014/09/15"[PDat] : "2021/09/15"[PDat])

## **EMBASE**

#1

('dental caries'/exp OR 'caries prevention'/exp) AND [2014-2021]/py AND ([adolescent]/lim OR [child]/lim OR [preschool]/lim OR [school]/lim OR [young adult]/lim) AND 'practice guideline'/de

## **Systematic Reviews search**

### **COCHRANE LIBRARY**

“Dental caries” in Title and Abstract

Custom date range Topics: 15.09.2009-15.09.2021

## **EMBASE**

#1

('dental caries'/exp OR 'dental caries' OR 'caries prevention'/exp OR 'caries prevention') AND ('complementary feeding'/exp OR 'complementary feeding' OR 'feeding behavior'/exp OR 'feeding behavior' OR 'weaning'/exp OR 'weaning' OR 'responsiveness'/exp OR 'responsiveness' OR 'responsive feeding' OR 'non responsive feeding') AND [2009-2021]/py AND ([systematic review]/lim OR [meta analysis]/lim) AND ([adolescent]/lim OR [child]/lim OR [preschool]/lim OR [school]/lim OR [young adult]/lim)

#2

('dental caries'/exp OR 'caries prevention'/exp) AND ('risk'/exp OR 'risk factor'/exp) AND [2009-2021]/py AND ([systematic review]/lim OR [meta analysis]/lim) AND ([adolescent]/lim OR [child]/lim OR [preschool]/lim OR [school]/lim OR [young adult]/lim)

## **PUBMED**

#1

("Risk"[Mesh] AND ("2009/08/24"[PDat] : "2021/09/15"[PDat] AND ("infant"[MeSH Terms] OR "child"[MeSH Terms] OR "adolescent"[MeSH Terms]))) AND (((("DMF Index"[Mesh] OR "Dental Caries"[Mesh]) OR "Dental Caries Susceptibility"[Mesh] OR "early childhood caries"[All Fields] OR "ECC"[All Fields]) OR "caries prevention"[All Fields] OR "dental caries prevention"[All Fields] OR "dental caries risk"[All Fields] OR ("dental"[All Fields] AND "caries"[All Fields]) OR "dental caries"[All Fields]) AND ("child"[MeSH Terms] OR "child"[All Fields] OR "children"[All Fields]))) AND ((systematic[sb] OR Meta-Analysis[ptyp])

#2

("responsive feeding"[All Fields] OR "non-responsive feeding"[All Fields] OR "responsiveness"[All Fields] OR "Weaning"[All Fields] OR "Infant Nutritional Physiological Phenomena"[MeSH] OR "complementary feeding"[All Fields] OR "Feeding Behavior"[All Fields]) AND ((("DMF Index"[Mesh] OR "Dental Caries"[Mesh]) OR "Dental Caries Susceptibility"[Mesh] OR "early childhood caries"[All Fields] OR "ECC"[All Fields] OR "caries prevention"[All Fields] OR "dental caries prevention"[All Fields] OR "dental caries risk"[All Fields] OR ("dental caries"[MeSH Terms] OR ("dental"[All Fields] AND "caries"[All Fields]) OR "dental caries"[All Fields]) AND ("child"[MeSH Terms] OR "child"[All Fields] OR "children"[All Fields]))) AND ((systematic[sb] OR Meta-Analysis[ptyp]) AND "2009/09/15"[PDat] : "2021/09/15"[PDat])

## **Studies search**

### **PUBMED**

#1

("DMF Index"[Mesh] OR "Dental Caries"[Mesh]) OR "Dental Caries Susceptibility"[Mesh] OR "early childhood caries"[All Fields] OR "ECC"[All Fields] OR "dental caries prevention"[All Fields] OR "dental caries risk"[All Fields] OR (("dental caries"[MeSH Terms] OR ("dental"[All Fields] AND "caries"[All Fields]) OR "dental caries"[All Fields]) AND ("child"[MeSH Terms] OR "child"[All Fields] OR "children"[All Fields])) AND ("responsive feeding"[All Fields] OR "non-responsive feeding"[All Fields] OR "responsiveness"[All Fields] OR "Weaning"[All Fields] OR "Infant Nutritional Physiological Phenomena"[MeSH] OR "complementary feeding"[All Fields] OR "Feeding Behavior"[All Fields]) AND ((Clinical Study[ptyp] OR Clinical Trial[ptyp] OR Comparative Study[ptyp] OR Controlled Clinical Trial[ptyp] OR Multicenter Study[ptyp] OR Observational Study[ptyp] OR Pragmatic Clinical Trial[ptyp] OR Randomized Controlled Trial[ptyp]) AND ("infant"[MeSH Terms] OR "child"[MeSH Terms] OR "adolescent"[MeSH Terms])) AND ("1979/01/01"[PDat] : "2021/09/15"[PDat] )

## EMBASE

#1

('dental caries'/exp OR 'dental caries' OR 'caries prevention'/exp OR 'caries prevention') AND ('complementary feeding'/exp OR 'complementary feeding' OR 'feeding behavior'/exp OR 'feeding behavior' OR 'weaning'/exp OR 'weaning' OR 'responsiveness'/exp OR 'responsiveness' OR 'responsive feeding' OR 'non responsive feeding') AND ([adolescent]/lim OR [child]/lim OR [infant]/lim OR [preschool]/lim OR [school]/lim OR [young adult]/lim) AND ('case control study'/de OR 'clinical trial'/de OR 'cohort analysis'/de OR 'comparative study'/de OR 'controlled clinical trial'/de OR 'controlled study'/de OR 'cross-sectional study'/de OR 'double blind procedure'/de OR 'evidence based dentistry'/de OR 'longitudinal study'/de OR 'observational study'/de OR 'prospective study'/de OR 'randomized controlled trial'/de OR 'retrospective study'/de) AND [1979-2021]/py

## COCHRANE LIBRARY

“Dental caries” in Title Abstract Keyword - in Trials with 'Child Health' in Cochrane Groups (Word variations have been searched) from Jan 1979 and Jan 2021, in Trials

**Figure S1.y: Guidelines search flow diagram. Responsive and non-responsive complementary feeding. Caries.**

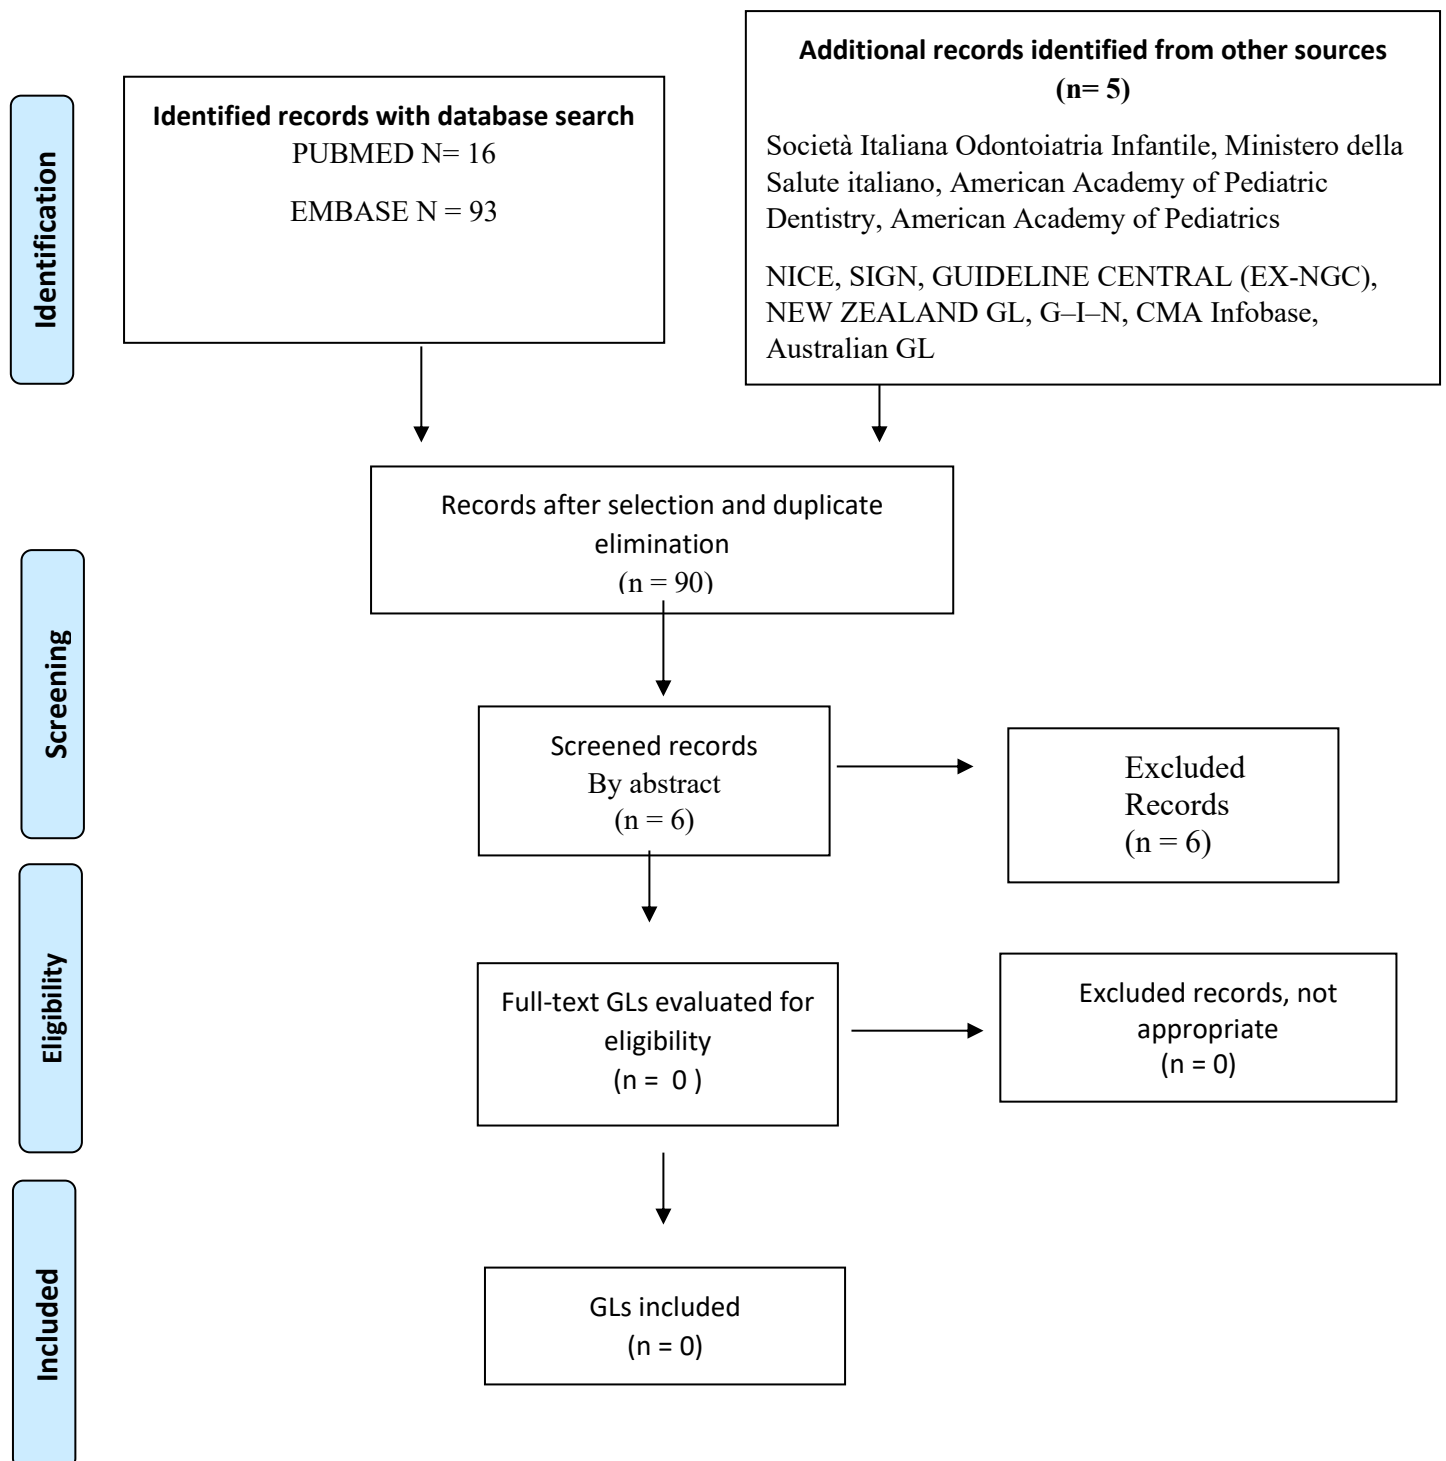

**Figura S1.z: SRs search flow diagram. Responsive and non-responsive complementary feeding. Caries.**

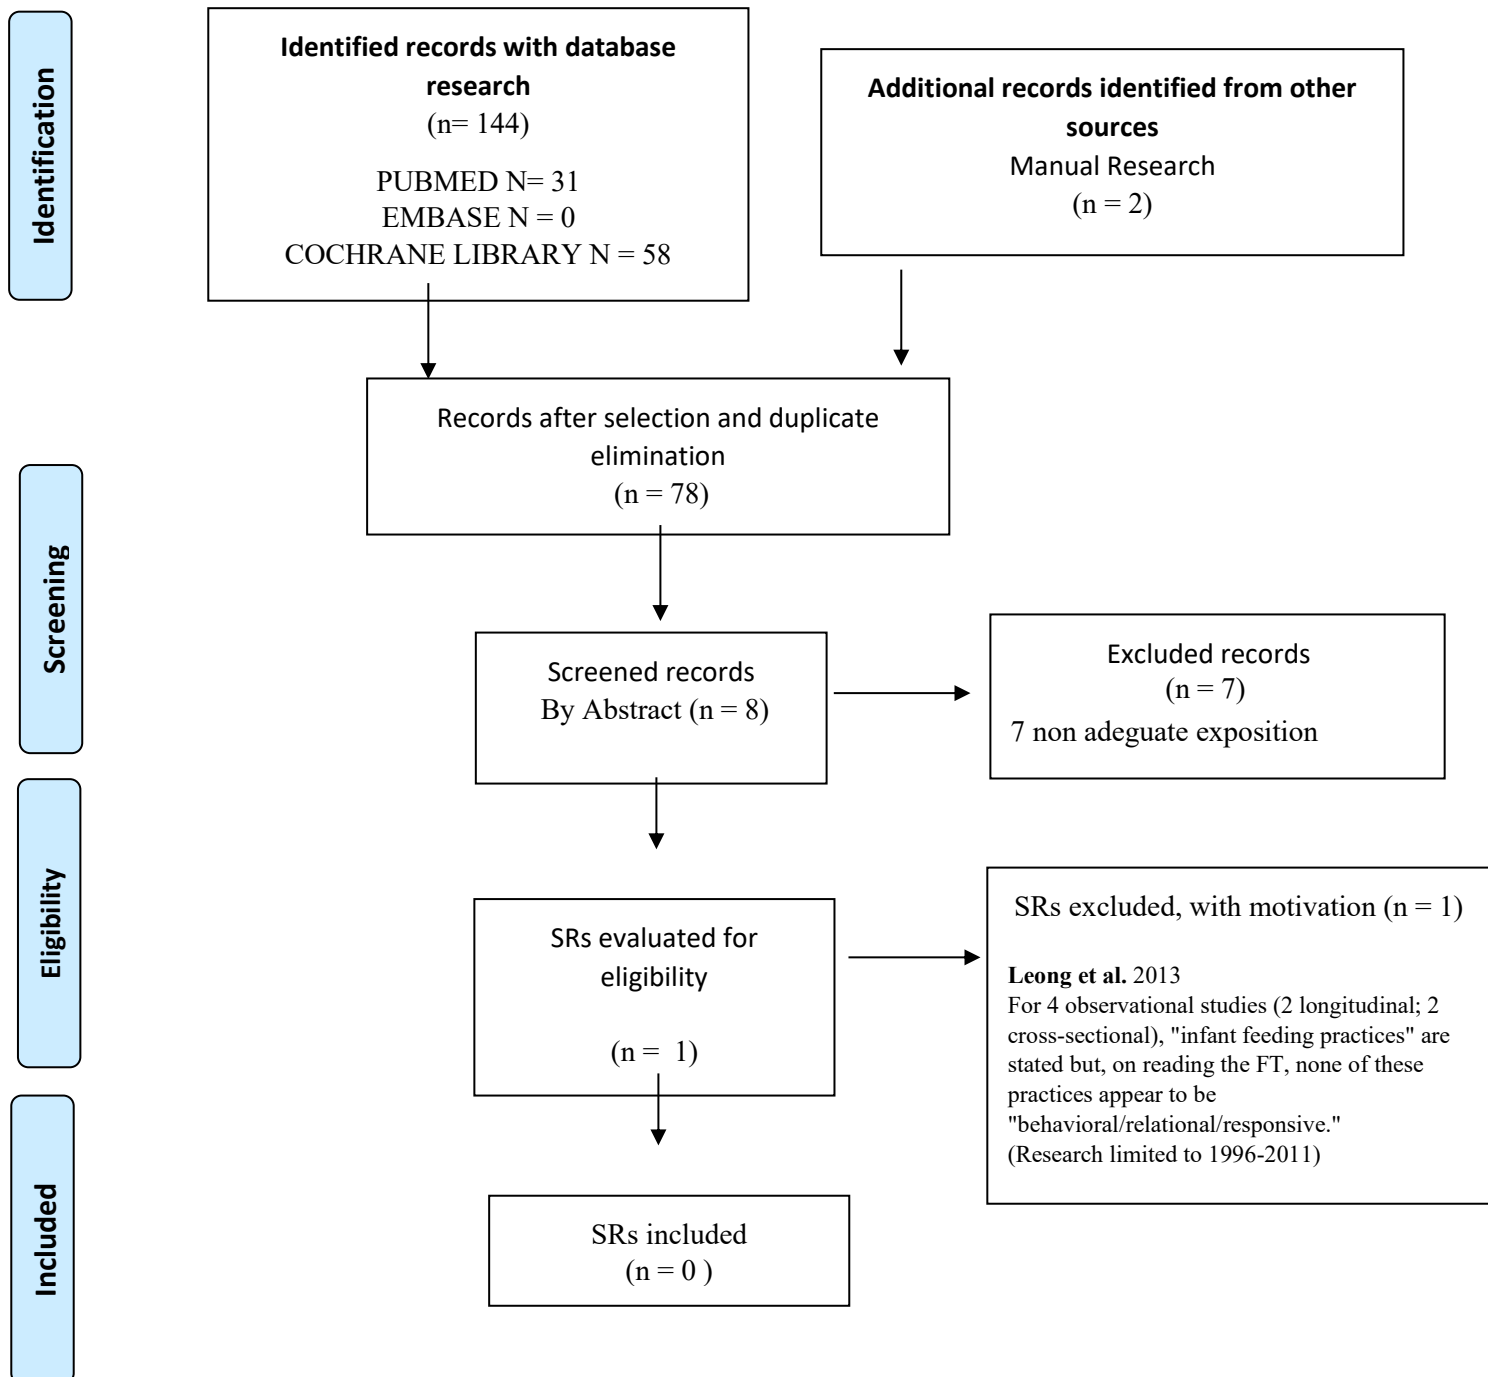

**Figure S1.aa: Studies flow diagram. Responsive and non-responsive complementary feeding. Caries.**

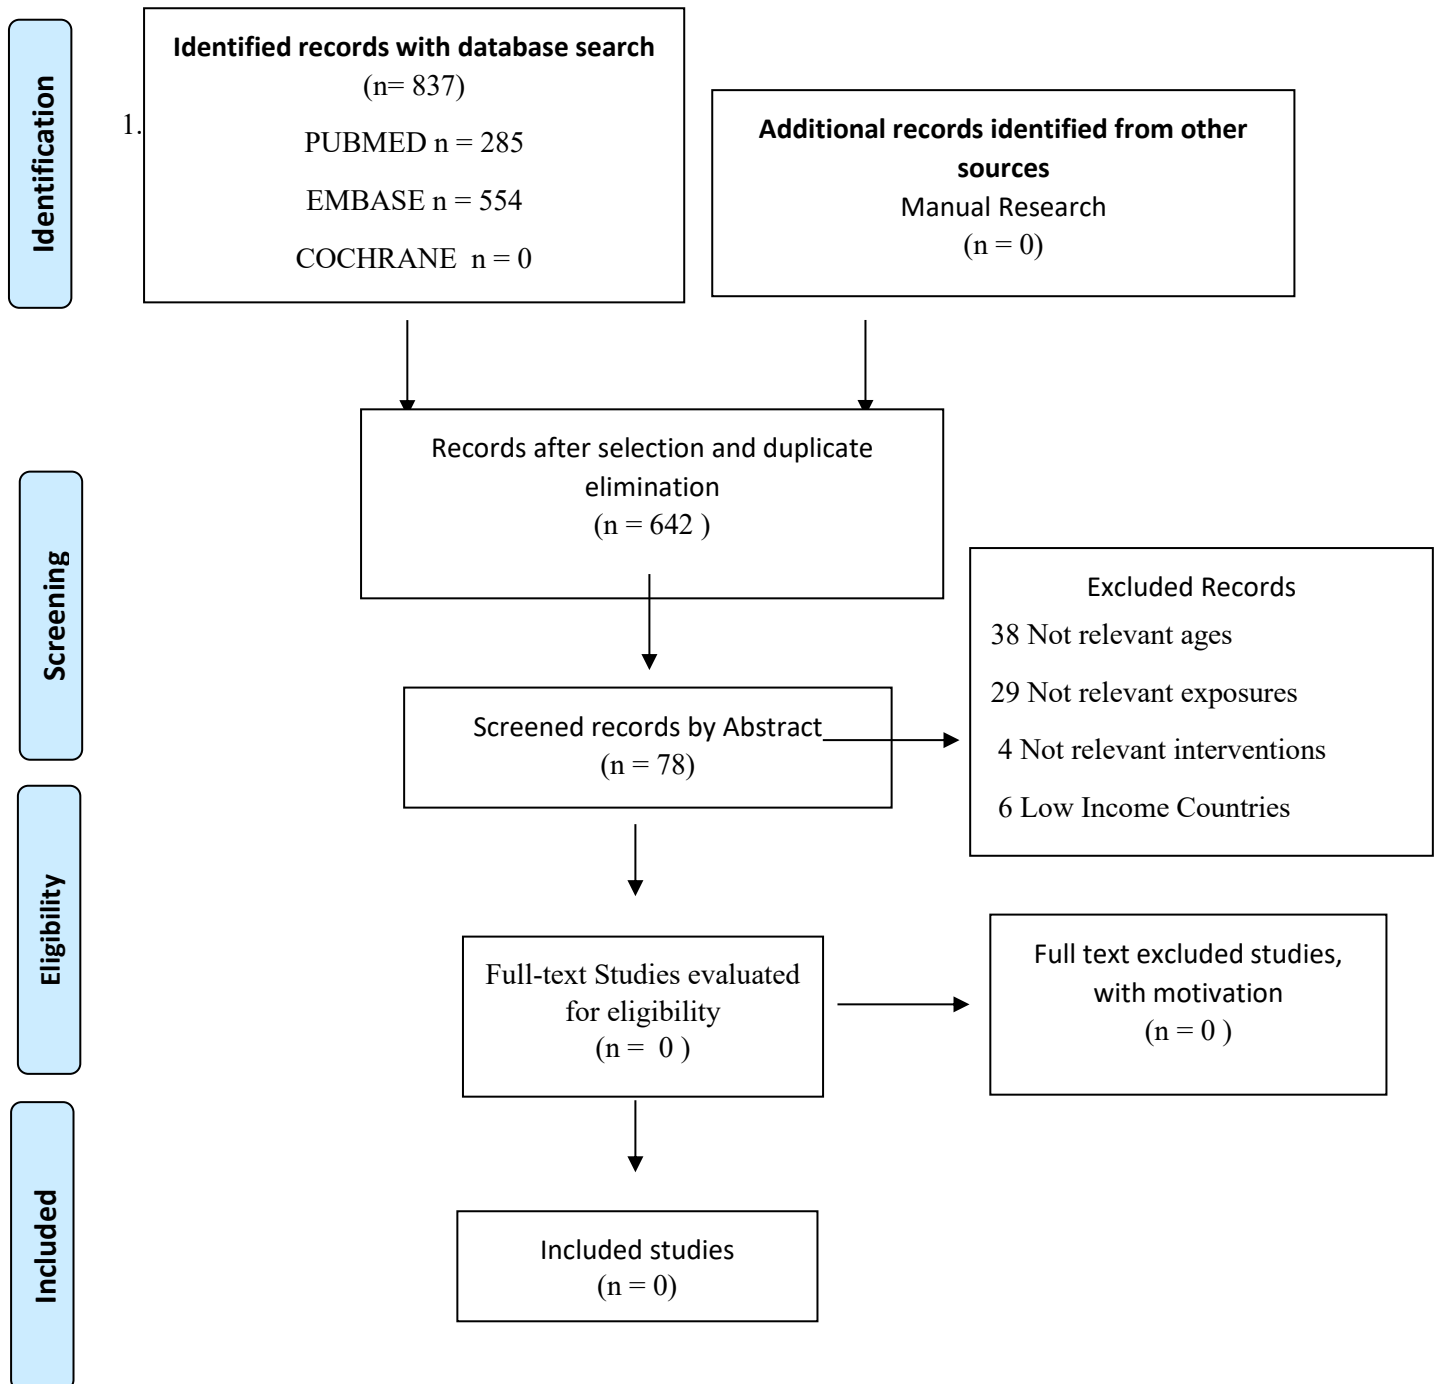

BLW/BLISS. Growth. Risk of the overweight/obesity

Table S2a: Appraisal of the Systematic Review

|                                                                                                                                                                                                                                       |                        |                                 |
|---------------------------------------------------------------------------------------------------------------------------------------------------------------------------------------------------------------------------------------|------------------------|---------------------------------|
| AMSTAR 2                                                                                                                                                                                                                              | D’Auria et a. 2018 [1] | Martinòn-Torres et al. 2020 [2] |
| 1. Did the research questions and inclusion criteria for the review include the components of PICO? (Yes/No)                                                                                                                          | Yes                    | Yes                             |
| 2. Did the report of the review contain an explicit statement that the review methods were established before the conduct of the review and did the report justify any significant deviations from the protocol? (Yes/Partial Yes/No) | Partial yes            | Partial yes                     |
| 3. Did the review authors explain their selection of the study designs for inclusion in the review? (Yes/No)                                                                                                                          | Yes                    | No                              |
| 4. Did the review authors use a comprehensive literature search strategy? (Yes/Partial Yes/No)                                                                                                                                        | Partial yes            | Yes                             |
| 5. Did the review authors perform study selection in duplicate? (Yes/No)                                                                                                                                                              | Yes                    | Yes                             |
| 6. Did the review authors perform data extraction in duplicate?(Yes/No)                                                                                                                                                               | Yes                    | No                              |
| 7. Did the review authors provide a list of excluded studies and justify the exclusions? (Yes/Partial Yes/No)                                                                                                                         | Yes                    | No                              |
| 8. Did the review authors describe the included studies in adequate detail? (Yes/Partial Yes/No)                                                                                                                                      | Yes                    | Partial yes                     |
| 9. Did the review authors use a satisfactory technique for assessing the risk of bias (RoB) in individual studies that were included in the review? (Yes/Partial Yes/No/Includes only NRSI-RCT)                                       | YES<br>YES             | Yes<br>Yes                      |
| 10. Did the review authors report on the sources of funding for the studies included in the review?(Yes/No)                                                                                                                           | No                     | No                              |
| 11. If meta-analysis was performed did the review authors use appropriate methods for statistical combination of results? (Yes / No / No meta-analysis conducted)                                                                     | No meta-analysis       | No meta-analysis                |
| 12. If meta-analysis was performed, did the review authors assess the potential impact of RoB in individual studies on the results of the meta-analysis or other evidence synthesis? (Yes / No / No meta-analysis conducted)          | No meta-analysis       | No meta-analysis                |
| 13. Did the review authors account for RoB in individual studies when interpreting/ discussing the results of the review? (Yes/No)                                                                                                    | Yes                    | Yes                             |
| 14. Did the review authors provide a satisfactory explanation for, and discussion of, any heterogeneity observed in the results of the review? (Yes/No)                                                                               | Yes                    | Yes                             |
| 15. If they performed quantitative synthesis did the review authors carry out an adequate investigation of publication bias (small study                                                                                              | No meta-analysis       | No meta-analysis                |



|                                                                                                                                                          |                  |             |
|----------------------------------------------------------------------------------------------------------------------------------------------------------|------------------|-------------|
| bias) and discuss its likely impact on the results of the review? (Yes / No / No meta-analysis conducted)                                                |                  |             |
| 16. Did the review authors report any potential sources of conflict of interest, including any funding they received for conducting the review? (Yes/No) | Yes              | Yes         |
| OVERALL EVALUATION                                                                                                                                       | Moderate quality | Low quality |

Table S2b: SRs excluded with motivation.

| EXCLUDED                 | Reason for exclusion     |
|--------------------------|--------------------------|
| Harrison et al. 2017 [3] | Outcomes not pertinent   |
| Arikpo et al. 2018 [4]   | Exposition not pertinent |
| Gomez et al. 2020 [5]    | Narrative review         |

Table S2c: Appraisal of the Studies

| Newcastle Quality Assessment Scale<br>CROSS-SECTIONAL STUDIES |                                  |             |                   |                                   |                                                                                                                |                            |                  |            |
|---------------------------------------------------------------|----------------------------------|-------------|-------------------|-----------------------------------|----------------------------------------------------------------------------------------------------------------|----------------------------|------------------|------------|
| Selection                                                     |                                  |             |                   |                                   | Comparability                                                                                                  | Outcome                    |                  |            |
| Study                                                         | Representativeness of the sample | Sample size | Non-Response rate | Ascertainment of exposure (max 2) | Comparability between groups, confounders are controlled (max2)                                                | Outcome evaluation (max 2) | Statistical test | Total      |
| Townsend et al. 2012 [6]                                      | c                                | b           | 1a                | c                                 | None                                                                                                           | c                          | 1a               | 3 Low      |
| Brown et al. 2015 [7]                                         | 1b                               | b           | b                 | 1a                                | 1a, 1b                                                                                                         | c                          | 1a               | 5 Moderate |
| Kahraman et al. 2020 [8]                                      | 1b                               | b           | 1a                | 1b                                | None<br>They are indicated and discussed, but they are not related to our outcomes in the statistical analysis | c                          | 1a               | 4          |

RCTs

Figure S2a: Risk of bias summary: review authors' judgements about each risk of bias item for each included study.

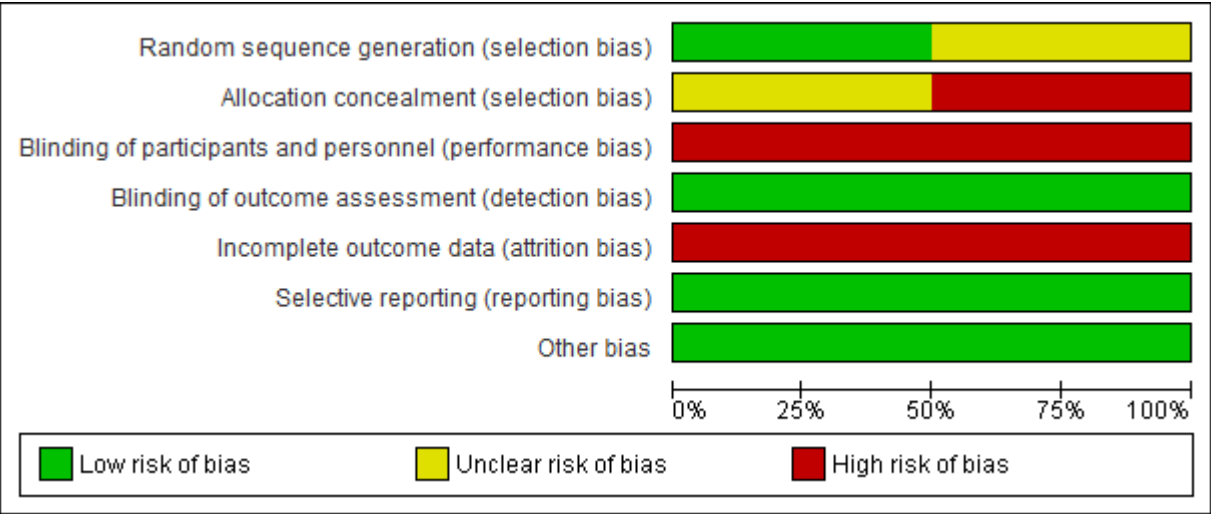

Figure S2b: Risk of bias graph: review authors' judgments about each risk of bias item presented as percentages across all included studies [9,10]

|             | Random sequence generation (selection bias) | Allocation concealment (selection bias) | Blinding of participants and personnel (performance bias) | Blinding of outcome assessment (detection bias) | Incomplete outcome data (attrition bias) | Selective reporting (reporting bias) | Other bias |
|-------------|---------------------------------------------|-----------------------------------------|-----------------------------------------------------------|-------------------------------------------------|------------------------------------------|--------------------------------------|------------|
| Dogan 2018  | ?                                           | ?                                       | -                                                         | +                                               | -                                        | +                                    | +          |
| Taylor 2017 | +                                           | -                                       | -                                                         | +                                               | -                                        | +                                    | +          |

**Table S2d. Studies excluded with motivation.**

| EXCLUDED                  | Reason for exclusion |
|---------------------------|----------------------|
| Jones et al. 2020<br>[11] | Undefined exposures  |

Table S2e: Evaluation of Systematic Review Overviews

| COCHRANE TOOL FOR OVERVIEWS OF REVIEWS |                                                                                                                                                                      | Gerritsen et al. 2017 [12]                                      |
|----------------------------------------|----------------------------------------------------------------------------------------------------------------------------------------------------------------------|-----------------------------------------------------------------|
| Objective                              | To summarize evidence from <i>systematic reviews</i> examining effects of interventions                                                                              | Appropriate                                                     |
| Selection criteria                     | Describe inclusion and exclusion criteria for review                                                                                                                 | Appropriate                                                     |
| Search                                 | Typically, look only for relevant Cochrane intervention reviews.                                                                                                     | Appropriate (RCT and Cohort Studies if recent and important)    |
| Data collection                        | From the included systematic review                                                                                                                                  | Appropriate                                                     |
| Assessment of limitation               | For included sistematic review                                                                                                                                       | Appropriate                                                     |
| Quality of the evidences               | As far as possible it should be based on evaluation reported in the included systematic review                                                                       | Appropriate                                                     |
| Analysis                               | Summary of the results of the reviews; further analysis can be undertaken for comparisons between reviews, typically indirect comparisons of multiple interventions. | Appropriate (Summaries of results almost always only narrative) |
| Overall evaluation                     |                                                                                                                                                                      | Good methodological quality.                                    |

Table S2f: Appraisal of the Systematic Review

|                                                                                                                                                                                                                                          |                        |
|------------------------------------------------------------------------------------------------------------------------------------------------------------------------------------------------------------------------------------------|------------------------|
| AMSTAR 2                                                                                                                                                                                                                                 | Spill et al. 2019 [13] |
| 1. Did the research questions and inclusion criteria for the review include the components of PICO?<br>(Yes/No)                                                                                                                          | Yes                    |
| 2. Did the report of the review contain an explicit statement that the review methods were established before the conduct of the review and did the report justify any significant deviations from the protocol?<br>(Yes/Partial Yes/No) | Yes                    |
| 3. Did the review authors explain their selection of the study designs for inclusion in the review?<br>(Yes/No)                                                                                                                          | Yes                    |
| 4. Did the review authors use a comprehensive literature search strategy?<br>(Yes/Partial Yes/No)                                                                                                                                        | Yes                    |
| 5. Did the review authors perform study selection in duplicate?<br>(Yes/No)                                                                                                                                                              | Yes                    |
| 6. Did the review authors perform data extraction in duplicate?<br>(Yes/No)                                                                                                                                                              | Yes                    |
| 7. Did the review authors provide a list of excluded studies and justify the exclusions?<br>(Yes/Partial Yes/No)                                                                                                                         | Yes                    |
| 8. Did the review authors describe the included studies in adequate detail?<br>(Yes/Partial Yes/No)                                                                                                                                      | Yes                    |
| 9. Did the review authors use a satisfactory technique for assessing the risk of bias (RoB) in individual studies that were included in the review?<br>(Yes/Partial Yes/No/Includes only NRSI-RCT)                                       | Yes<br>Yes             |
| 10. Did the review authors report on the sources of funding for the studies included in the review?<br>(Yes/No)                                                                                                                          | No                     |
| 11. If meta-analysis was performed did the review authors use appropriate methods for statistical combination of results?<br>(Yes / No / No meta-analysis conducted)                                                                     | ///                    |
| 12. If meta-analysis was performed, did the review authors assess the potential impact of RoB in individual studies on the results of the meta-analysis or other evidence synthesis?<br>(Yes / No / No meta-analysis conducted)          | ///                    |
| 13. Did the review authors account for RoB in individual studies when interpreting/ discussing the results of the review?<br>(Yes/No)                                                                                                    | Yes                    |
| 14. Did the review authors provide a satisfactory explanation for, and discussion of, any heterogeneity observed in the results of the review?                                                                                           | Yes                    |

|                                                                                                                                                                                                                                                       |                  |
|-------------------------------------------------------------------------------------------------------------------------------------------------------------------------------------------------------------------------------------------------------|------------------|
| (Yes/No)                                                                                                                                                                                                                                              |                  |
| 15. If they performed quantitative synthesis did the review authors carry out an adequate investigation of publication bias (small study bias) and discuss its likely impact on the results of the review?<br>(Yes / No / No meta-analysis conducted) | ///              |
| 16. Did the review authors report any potential sources of conflict of interest, including any funding they received for conducting the review?<br>(Yes/No)                                                                                           | Yes              |
| OVERALL EVALUATION                                                                                                                                                                                                                                    | Moderate quality |

Figure S2c: Risk of bias summary: review authors' judgments about each risk of bias item for each included study. [14,15,16]

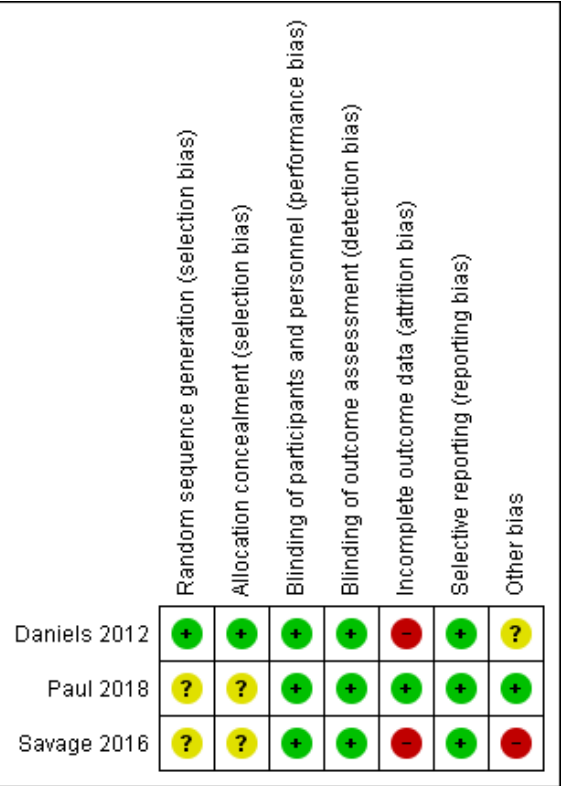

Figura S2d: Risk of bias graph: review authors' judgments about each risk of bias item presented as percentages across all included studies

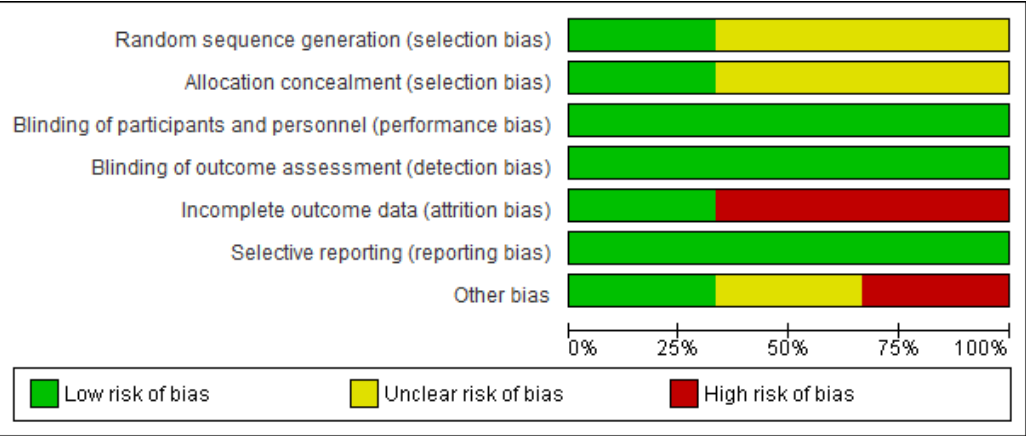

Table S2g: Appraisal of the Studies

|                               | Newcastle Quality Assessment Scale<br>COHORT STUDIES |                                       |                                  |                                                                                                 |                                                               |                       |                                                                   |                                                                   |       |
|-------------------------------|------------------------------------------------------|---------------------------------------|----------------------------------|-------------------------------------------------------------------------------------------------|---------------------------------------------------------------|-----------------------|-------------------------------------------------------------------|-------------------------------------------------------------------|-------|
|                               | Selection                                            |                                       |                                  |                                                                                                 | Comparability                                                 | Outcome               |                                                                   |                                                                   |       |
| Study                         | Representativeness<br>of the exposed<br>cohort       | Selection of<br>non-exposed<br>cohort | Ascertainment of the<br>exposure | Demonstration<br>that the outcome<br>of interest is not<br>present at the start<br>of the study | Comparability<br>of cohorts based<br>on design or<br>analysis | Outcome<br>evaluation | Was the follow-<br>up long enough<br>for the outcome<br>to occur? | Adequacy of<br>cohort follow-<br>up                               | Total |
| Wright et al.<br>2006 [17]    | 1a                                                   | 1a                                    | c                                | 1a                                                                                              | 1a<br>1b                                                      | 1b                    | b                                                                 | >40% (not<br>described)                                           | 7     |
| Chaidez et al.<br>2015 [18]   | c                                                    | 1a                                    | 1b                               | Presence of<br>overweight in some                                                               | 1a<br>1b                                                      | 1b                    | 1a                                                                | 36%<br>(description of<br>the<br>characteristics<br>of the lost)  | 6     |
| Dinkevich et al.<br>2015 [19] | 1b                                                   | 1a                                    | 1b<br>c                          | Presence of<br>overweight in some                                                               |                                                               | 1b                    | 1a                                                                | 27%<br>(description of<br>the<br>characteristics<br>of the lost)  | 7     |
| Hittner et al.<br>2016 [20]   | c                                                    | 1a                                    | 1b                               | NO                                                                                              | unclear                                                       | 1b                    | 1a                                                                | No statement                                                      | 4     |
| Stifter et al.<br>2015 [21]   | c                                                    | 1a                                    | d                                | NO                                                                                              | 1a<br>1b                                                      | 1b                    | 1a                                                                | 16%<br>(description of<br>the<br>characteristics<br>of the lost)* | 6     |



|                          |                                                                                              |
|--------------------------|----------------------------------------------------------------------------------------------|
| Worobey et al. 2009 [25] | Not pertinent, conducted on Hispanic and Black american children of low socioeconomic status |
| Ma et al. 2015 [26]      | Not pertinent, conducted on Asiatic children                                                 |
| Shi et al. 2017 [27]     | Not pertinent, conducted on Asiatic children                                                 |

RCF/NRCF and risk of overweight/obesity

Table S2i: Clinical Guidelines and Documents excluded.

| Excluded GLs                                                          | Multidisciplinarity of the panel                   | Systematic search for evidence                                                                                      | Grading of recommendations             | Reason for exclusion                                                         |
|-----------------------------------------------------------------------|----------------------------------------------------|---------------------------------------------------------------------------------------------------------------------|----------------------------------------|------------------------------------------------------------------------------|
| Canada’s Dietary Guidelines 2018 [28]                                 | Limited to Nutritionists and Public Health Experts | NO                                                                                                                  | NO                                     | Low methodological quality<br>It does not contain pertinent recommendations  |
| Dereń et al. EAP ECOG 2019 [29]                                       | NO                                                 | NO                                                                                                                  | NO                                     | Low methodological quality                                                   |
| Fewtrell et al.. ESPGHAN 2017. Complementary feeding [30]             | NO                                                 | Declared but not published                                                                                          | NO                                     | Low methodological quality                                                   |
| Koletzko et al. 2019 The Early Nutrition Project Recommendations [31] | YES                                                | YES but not explicated (they use SR already published: for the questions of this Consensus Patro-Golab et al. 2016) | NO Consent vote                        | Low methodological quality                                                   |
| NICE 2015 Preventing excess weight gain [32]                          | ===                                                | =====                                                                                                               | ===                                    | Interventions subsequent to the period of the CF                             |
| Romero-Velardea et al. 2016. Alimentation complementaria [33]         | Limited to Pediatricians and Nutrition Experts     | NO                                                                                                                  | NO                                     | Low methodological quality                                                   |
| Schwarzenberg et al. 2018. AAP Policy Statement [34]                  | NO                                                 | NO                                                                                                                  | NO                                     | Low methodological quality                                                   |
| USDA 2015-2020 [35]                                                   | YES                                                | YES                                                                                                                 | Related to the quality of the evidence | It does not contain pertinent recommendations                                |
| SIEDP-SIP 2018 Obesity [36]                                           | YES                                                | NO, only MEDLINE                                                                                                    | YES                                    | Moderate methodological quality. It does not report relevant recommendations |
| Heyman et al. 2017 [37]                                               |                                                    |                                                                                                                     |                                        |                                                                              |

See Table S2e: Evaluation of Systematic Review Overviews

|                                        |                            |
|----------------------------------------|----------------------------|
| COCHRANE TOOL FOR OVERVIEWS OF REVIEWS | Gerritsen et al. 2017 [12] |
|----------------------------------------|----------------------------|

See Table S2f: Appraisal of the Systematic Review

|          |                        |
|----------|------------------------|
| AMSTAR 2 | Spill et al. 2019 [13] |
|----------|------------------------|

Table S2j: SRs excluded with motivation.

| EXCLUDED                                                | Reason for exclusion                                               |
|---------------------------------------------------------|--------------------------------------------------------------------|
| Redsell et al. 2016 [38]                                | Low quality, with relevant studies but excluded from this SR       |
| Sokol et al. 2017 [39]                                  | Low quality, with relevant studies but excluded from this SR       |
| Matvienko-Sikar et al. 2018 [40]                        | Low quality, with relevant studies but excluded from this SR       |
| Blake Lamb et al. 2016 (preventive interventions ) [41] | Low quality (AMSTAR-2 critical items failed)                       |
| Bonilla et al. 2017 (SRs and studies overview) [42]     | Low quality (Cochrane tool: 4 items on 7 not completely fulfilled) |
| Woo Baidal et al. 2016 (Risk factor) [43]               | Low quality (AMSTAR-2 critical items failed )                      |

Figure S2e: Risk of bias summary: review authors' judgements about each risk of bias item for each included study. [44,15,16]

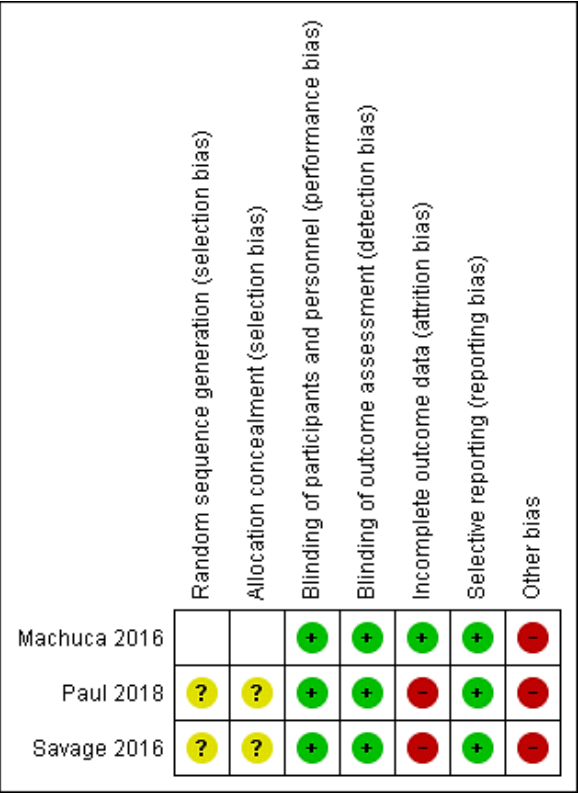

Figure S2f: Risk of bias graph: review authors' judgements about each risk of bias item presented as percentages across all included studies

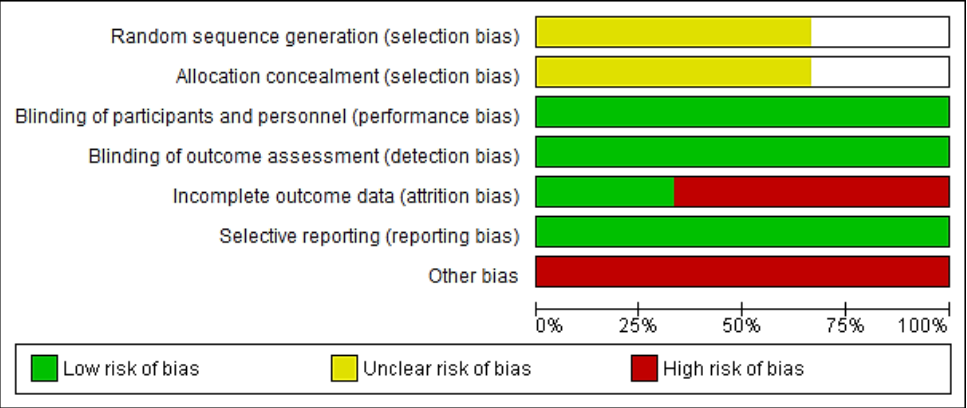

Table S2l: Appraisal of the Studies

| Newcastle Quality Assessment Scale<br>COHORT STUDIES |                                                |                                       |                                  |                                                                                                 |                                                               |                       |                                                                   |                                                                       |                        |
|------------------------------------------------------|------------------------------------------------|---------------------------------------|----------------------------------|-------------------------------------------------------------------------------------------------|---------------------------------------------------------------|-----------------------|-------------------------------------------------------------------|-----------------------------------------------------------------------|------------------------|
| Selection                                            |                                                |                                       |                                  |                                                                                                 | Comparability                                                 | Outcome               |                                                                   |                                                                       |                        |
| Study                                                | Representativeness<br>of the exposed<br>cohort | Selection of<br>non-exposed<br>cohort | Ascertainment of the<br>exposure | Demonstration<br>that the outcome<br>of interest is not<br>present at the start<br>of the study | Comparability<br>of cohorts based<br>on design or<br>analysis | Outcome<br>evaluation | Was the follow-<br>up long enough<br>for the outcome<br>to occur? | Adequacy of<br>cohort follow-<br>up                                   | Total                  |
| Rifas-Shiman<br>et al. 2011 [45]                     | 1a                                             | 1a                                    | d                                | 1a                                                                                              | 1a<br>1b                                                      | 1a                    | 1a                                                                | 1a 47% (<br>description of<br>the<br>characteristics<br>of the lost ) | 8<br>Good quality<br>+ |
| Lumeng et al.<br>2012 [46]                           | 1b                                             | 1a                                    | 1a                               | b                                                                                               | 1a<br>1b                                                      | 1a                    | 1a                                                                | c 11% (no<br>analysis on the<br>lost)                                 | 7<br>Good quality      |
| Thompson et<br>al. 2013 [47]                         | c                                              | 1a                                    | d                                | b (BMI≤25 only in<br>26,7%)                                                                     | 1b                                                            | 1a                    | 1a                                                                | c 36% ( no<br>analysis on the<br>lost )                               | 4<br>Low quality       |

Table S2m: Excluded studies with motivation

| EXCLUDED STUDIES                                                  | Reason for exclusion                                                                                               |
|-------------------------------------------------------------------|--------------------------------------------------------------------------------------------------------------------|
| Paul et al. 2011 [22]                                             | Low methodological quality (Loss to follow-up > 20%)                                                               |
| Daniels et al. 2012 [14]                                          | Not pertinent (overweight and obesity are not outcomes of the study)                                               |
| Dinkevich et al. 2015 [19]                                        | Not pertinent (overweight and obesity are not outcomes of the study)                                               |
| Daniels et al. 2013<br>(follow-up di Daniels et al.<br>2012) [23] | Low methodological quality (Loss to follow-up > 20%)                                                               |
| Daniels et al. 2015<br>(follow-up di Daniels et al.<br>2012) [24] | Low methodological quality (Loss to follow-up > 20%)                                                               |
| Shi et al. 2017 [27]                                              | Not pertinent (conducted in China)                                                                                 |
| Morandi et al. 2019 [48]                                          | Low methodological quality (Loss to follow-up > 20%)                                                               |
| Farrow et al. 2008 [49]                                           | Not pertinent (overweight and obesity are not outcomes of the study)                                               |
| Gregory et al. 2011 [50]                                          | Low methodological quality. Not pertinent (overweight and obesity<br>are not outcomes of the study)                |
| Schroeder et al. 2015 [51]                                        | Not pertinent (intervention not specified as RCF)                                                                  |
| Hohman et al. 2017 [52]                                           | From the INSIGHT study. Not pertinent (dietary pattern)                                                            |
| Agras et al.2004 [53]                                             | Low methodological quality, high loss at follow up, discordant data,<br>inadequate analysis of confounding factors |

BLW/BLISS and choking risk.

See Table S2a: Appraisal of the Systematic Reviews.

|          |                        |
|----------|------------------------|
| AMSTAR 2 | D'Auria et a. 2018 [1] |
|----------|------------------------|

Figure S2g: Risk of bias summary: review authors' judgements about each risk of bias item for each included study. [9,54]

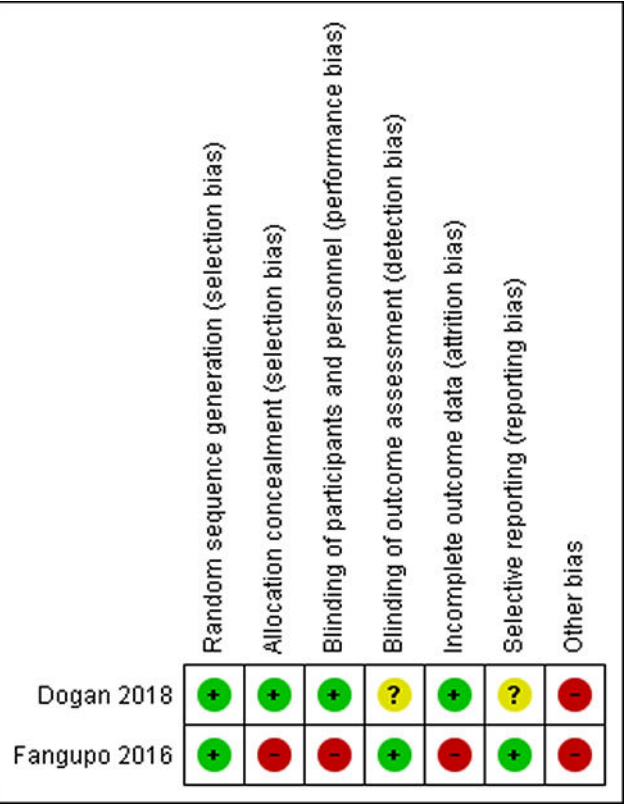

Figure S2.26j: Risk of bias graph: review authors' judgements about each risk of bias item presented as percentages across all included studies.

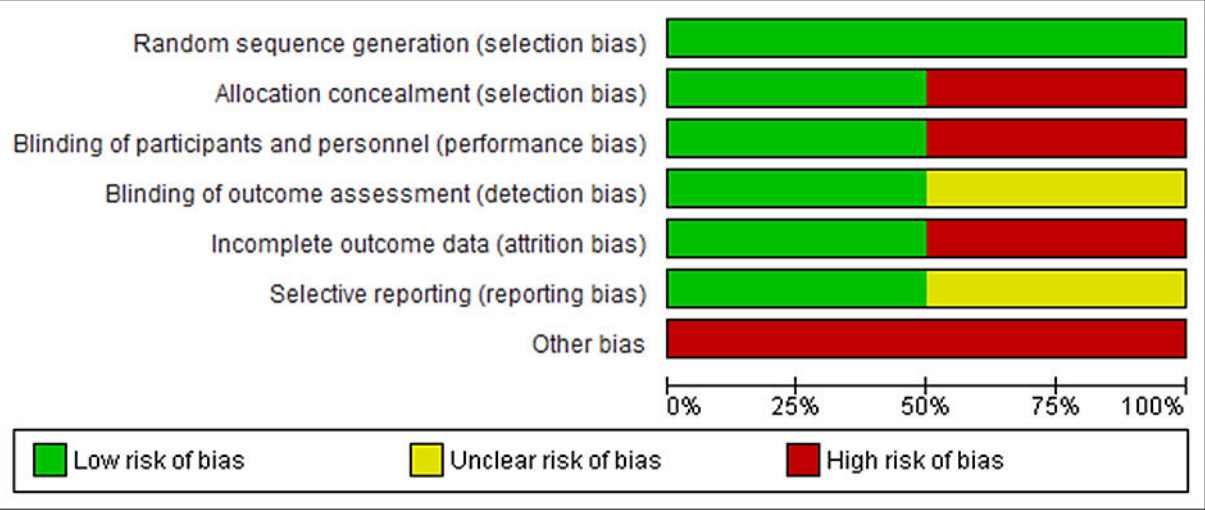

Table S2n: Appraisal of the Studies

| Newcastle Quality Assessment Scale<br>STUDI CROSS-SECTIONAL |                                  |              |                 |                                       |                                                                                                                |                            |                  |       |
|-------------------------------------------------------------|----------------------------------|--------------|-----------------|---------------------------------------|----------------------------------------------------------------------------------------------------------------|----------------------------|------------------|-------|
| Selection                                                   |                                  |              |                 |                                       |                                                                                                                |                            |                  |       |
| Study                                                       | Representativeness of the sample | Sample size: | Non-respondents | Ascertainment of the exposure (max 2) | Comparability between groups, confounders are controlled (Maximum 2 stars)                                     | Outcome evaluation (max 2) | Statistical test | Total |
| Kahraman et al. 2020 [8] (see Table S2c)                    | 1b                               | b            | 1a              | 1b                                    | None<br>They are indicated and discussed, but they are not related to our outcomes in the statistical analysis | c                          | 1a               | 4     |
| Cameron et al. 2013 [55]                                    | 1b                               | b            | 1a              | 1b                                    | 1a<br>1b                                                                                                       | c                          | 1a               | 6     |
| Brown et al. 2017 [56]                                      | c                                | b            | c               | 1b                                    | 1a<br>1b                                                                                                       | c                          | 1a               | 4     |
| Fu et al. 2018 [57]                                         | c                                | 1a           | c               | 1b                                    | c                                                                                                              | c                          | 1a               | 3     |

Table S2o: Excluded studies with motivation

| EXCLUDED STUDIES          | Reason for exclusion                                                                                  |
|---------------------------|-------------------------------------------------------------------------------------------------------|
| Özyüksel et al. 2019 [58] | High risk of exposure ascertainment bias (assessed self-feeding, but not ascertained BLW/BLISS mode). |

**RCF/NRCF and caries risk.**

**Clinical Guidelines and Guidance Documents Appraisal, Systematic reviews and Studies**

None included.

**Table S2p: SRs excluded with motivation.**

| SRs excluded           | Reason for exclusion                                             |
|------------------------|------------------------------------------------------------------|
| Leong et al. 2013 [59] | Does not include work with behavioral exposure or interventions. |



File S3. RECOMMENDATIONS OF THE GLs, RESULTS OF THE SRs AND STUDIES

BLW/BLISS. Growth and development of overweight/obesity

|                                                                                                                                                                                                                                                                   |                                                                                                                                                                                                                                                                                                                                                                                                                                                                                                 |
|-------------------------------------------------------------------------------------------------------------------------------------------------------------------------------------------------------------------------------------------------------------------|-------------------------------------------------------------------------------------------------------------------------------------------------------------------------------------------------------------------------------------------------------------------------------------------------------------------------------------------------------------------------------------------------------------------------------------------------------------------------------------------------|
| <p><i>A. Can the BLW/BLISS method during CF influence, either positively or negatively, infant weight-length gain?</i></p> <p><i>B. Can the BLW/BLISS method during CF influence, either positively or negatively, the development of overweight/obesity?</i></p> | <p><b>A.</b><br/><b>P.</b> In a healthy child aged 6-24 months<br/><b>I.</b> the Baby-Led Weaning (or the BLISS method)<br/><b>C.</b> compared to other power models<br/><b>O.</b> does it involve a different physical growth?</p> <p><b>B.</b><br/><b>P.</b> In a healthy child aged 6-24 months<br/><b>I.</b> the Baby-Led Weaning (or the BLISS method)<br/><b>C.</b> compared to other power models<br/><b>O.</b> does it involve a different risk of overweight/obesity in later age?</p> |
|-------------------------------------------------------------------------------------------------------------------------------------------------------------------------------------------------------------------------------------------------------------------|-------------------------------------------------------------------------------------------------------------------------------------------------------------------------------------------------------------------------------------------------------------------------------------------------------------------------------------------------------------------------------------------------------------------------------------------------------------------------------------------------|

Table S3a: Included SRs. Characteristics, Results, and Conclusions

| Systematic Review                                                      | Population and purpose of the SR                                                                                                                                                                                                                         | Results                                                                                                                                                                                                                             | Conclusions                                                                                                                                                            |
|------------------------------------------------------------------------|----------------------------------------------------------------------------------------------------------------------------------------------------------------------------------------------------------------------------------------------------------|-------------------------------------------------------------------------------------------------------------------------------------------------------------------------------------------------------------------------------------|------------------------------------------------------------------------------------------------------------------------------------------------------------------------|
| D’Auria et al. 2018 (SR of RCTs and observational studies) [1]         | Children in the age of CF fed according to the BLW method, compared with children fed with traditional methods<br><br><u>Long term health outcomes: auxological parameters</u><br><br>(risk of suffocation, metabolic parameters, relational indicators) | Apparently in favor of BLW in the 2 observational studies: fewer overweight subjects and higher number of underweight subjects in the medium term.<br><br>No significant results in the randomized study that used the BLISS method | No valid conclusions possible regarding the influence of BLW on auxological parameters                                                                                 |
| Martinon-Torres et al. 2021 (SR of RCTs and observational studies) [2] | Children 6-24 moin CF according to BLW method vs traditional method<br><br>Long-term health outcomes: auxological parameters, risk of choking, relational indicators                                                                                     | Some studies seem to demonstrate lower weight gain in infants that apply BLW while others show inconclusive results                                                                                                                 | More clinical trials and prospective studies should be done prior to providing a general recommendation about the best method of weaning to reduce the risk of obesity |

Table S3b: Included studies. Characteristics and Results

| Study<br>(First Author, Year, Country/Setting) | Study design | Population<br>(sample size, baseline characteristics) | Intervention/exposure | Primary Outcome | Measures of treatment effect | Secondary Outcomes | Follow-up | Results | Funding |
|------------------------------------------------|--------------|-------------------------------------------------------|-----------------------|-----------------|------------------------------|--------------------|-----------|---------|---------|
|------------------------------------------------|--------------|-------------------------------------------------------|-----------------------|-----------------|------------------------------|--------------------|-----------|---------|---------|

|                                                |                                                             |                                                                                        |                         |                                        |                               |                                                                    |                 |                                                                                          |                                                                                                                                                                               |
|------------------------------------------------|-------------------------------------------------------------|----------------------------------------------------------------------------------------|-------------------------|----------------------------------------|-------------------------------|--------------------------------------------------------------------|-----------------|------------------------------------------------------------------------------------------|-------------------------------------------------------------------------------------------------------------------------------------------------------------------------------|
| Townsend et al. 2012 [6]<br>United Kingdom     | Cross-sectional<br>Data from self-completed questionnaire   | N = 155<br>Age 20–78 mo                                                                | BLW vs traditional CF   | BMIz sore at 20-78 month               | Mean difference (SD)          | /                                                                  | /               | BLW is associated with lower weight and less likely to be overweight or obese.(p=0.02)   | School of Psychology University of Nottingham (Within the last 5 years, ET and NP have received co-funding from Nutricia/Danone to support an ESRC CASE PhD studentship)      |
| Brown et al. 2015 [7]<br>United Kingdom        | Cross-sectional<br>Data from self-completed questionnaire   | N = 298<br>age 18–24 mo                                                                | BLW vs traditional CF   | Weigth at 18-24 month                  | Mean difference (SD)          | /                                                                  | /               | BLW is associated with lower weight and less likely to be overweight or obese.(p =0.005) | Not declared                                                                                                                                                                  |
| Kahraman et al. 2020 [8]<br>Turkey             | Cross-sectional<br>Data from a self-completed questionnaire | N = 526<br>age 18–24 mo                                                                | BLW vs traditional CF   | Weight, length, BMI at unspecified age | Difference of prevalence (SD) | Results of the Child feeding questionnaire (CFQ)                   | /               | BLW is associated with lower weight and less likelihood of being overweight (p=0.007)    | Not declared                                                                                                                                                                  |
| Dogan et al. 2018 (BLISS) [9]<br>Turkey        | RCT in open                                                 | 302 children aged 5-6 mo (156 BLISS, 146 traditional CF)                               | BLISS vs traditional CF | Weight, length, and CC                 | Mean Difference (SD)          | Choking, haematological parameters, and eating behaviors, at 12 mo | 12 mo (N = 280) | Faster weight gain from 6 to 12 mo (p = 0.001) in traditionally fed infants              | Not declared                                                                                                                                                                  |
| Taylor et al. 2017 (BLISS) [10]<br>New Zealand | RCT in open                                                 | N = 206 healthy women (105 BLISS, 101 traditional CF)<br>Outcomes measured until 24 mo | BLISS vs traditional CF | BMI z-score at 12 and 24 mo            | Mean difference (SD)          | Caloric self-regulation<br><br>Caloric intake                      | 24 mo (N = 166) | Mean BMI z-score not significantly different in the 2 groups, at 12 mo and at 24 mo      | Lottery Health Research, Meat & Livestock Australia, Karitane Products Society, Perpetual Trustees, New Zealand Federation of Women’s Institutes, and the University of Otago |

**RCF/NRCF and growth**

|                                                                                                                                                                                                                                                                                                                                |                                                                                                                                                                                                                                                                                                                                                                                                                                                                                       |
|--------------------------------------------------------------------------------------------------------------------------------------------------------------------------------------------------------------------------------------------------------------------------------------------------------------------------------|---------------------------------------------------------------------------------------------------------------------------------------------------------------------------------------------------------------------------------------------------------------------------------------------------------------------------------------------------------------------------------------------------------------------------------------------------------------------------------------|
| <p><i>C. Can RF during the CF period (Responsive Complementary Feeding - RCF) influence, either positively or negatively, physical growth?</i></p> <p><i>D. Can Non-Responsive Feeding during the CF period (Non-Responsive Complementary Feeding - NRCF) influence, either positively or negatively, physical growth?</i></p> | <p><b>C.</b><br/> <b>P.</b> Healthy child aged 6-24 months<br/> <b>I.</b> Responsive Complementary Feeding<br/> <b>C.</b> Compared to other feeding models<br/> <b>O.</b> Does it involve a different physical growth in later ages?</p> <p><b>D.</b><br/> <b>P.</b> Healthy child aged 6-24 months<br/> <b>I.</b> Non-responsive Complementary Feeding<br/> <b>C.</b> Compared to other feeding models<br/> <b>O.</b> Does it involve a different physical growth in later ages?</p> |
|--------------------------------------------------------------------------------------------------------------------------------------------------------------------------------------------------------------------------------------------------------------------------------------------------------------------------------|---------------------------------------------------------------------------------------------------------------------------------------------------------------------------------------------------------------------------------------------------------------------------------------------------------------------------------------------------------------------------------------------------------------------------------------------------------------------------------------|

Table S3c: Included SRs. Characteristics, Results, and Conclusions

| Systematic Review          | Population and purpose of the SR                                                                                                                                                                                                                                                                                                                                                                                                                   | Results                                                                                                                                                                                                                                                                                                                                                                                                                                                                                                                                                                                                                                                                                                                                                                                                                                                                                                                                                                                                                                                                                                                                                                                                                                                                                                                                                                                                                                                                                                                                                                                            | Conclusions                                                                                                                                                                                                                                                                                                                                                                                                                                                                                                                                                                                       |
|----------------------------|----------------------------------------------------------------------------------------------------------------------------------------------------------------------------------------------------------------------------------------------------------------------------------------------------------------------------------------------------------------------------------------------------------------------------------------------------|----------------------------------------------------------------------------------------------------------------------------------------------------------------------------------------------------------------------------------------------------------------------------------------------------------------------------------------------------------------------------------------------------------------------------------------------------------------------------------------------------------------------------------------------------------------------------------------------------------------------------------------------------------------------------------------------------------------------------------------------------------------------------------------------------------------------------------------------------------------------------------------------------------------------------------------------------------------------------------------------------------------------------------------------------------------------------------------------------------------------------------------------------------------------------------------------------------------------------------------------------------------------------------------------------------------------------------------------------------------------------------------------------------------------------------------------------------------------------------------------------------------------------------------------------------------------------------------------------|---------------------------------------------------------------------------------------------------------------------------------------------------------------------------------------------------------------------------------------------------------------------------------------------------------------------------------------------------------------------------------------------------------------------------------------------------------------------------------------------------------------------------------------------------------------------------------------------------|
| Gerritsen et al. 2017 [12] | <p>Present the best evidence currently available on the effect of different eating behaviors ("how" we eat) on the diet itself and on body size.</p> <p>Themes: breastfeeding, parental feeding practices and parenting styles, the role of adult role models, responsive feeding, meal times, and food culture.</p> <p>The analyses, based on Systematic Reviews and primary studies, cover all periods of life, from pregnancy to adulthood.</p> | <p><b>1. <u>Responsive nutrition; based on RS:</u></b></p> <p>The most frequent finding (16/31) across the three age groups was an association with parental feeding control and weight gain / child status. Restriction of food intake was related to a higher BMI and / or overweight and pressure during feeding was related to a lower BMI / weight gain. There was a positive relationship between indulgent eating behaviour and BMI and / or overweight and a negative association between indulgent eating and fruit and vegetable intake by children (Hurley et al 2011).</p> <p>Of the nine studies reviewed, three revealed associations with the size of feeding response as defined by the proposed model (Figure 8), but only one of these studies evaluated feeding interactions longitudinally, which Di Santis et al. found it necessary to truly assess the dynamic nature of feeding interactions between caregiver and infant and their impact on obesity outcomes. (Di Santis 2011).</p> <p>Excluding, in the present review, the 3 papers included by Gerritsen et al. on the Baby-Led Weaning</p> <p><b>2.Parenting Practices of Nutrition and Parenting Style:</b></p> <p>Six systematic reviews since 2007 have reported that restrictive feeding and parental control practices (i.e., denying intake, either of overall energy or of particular foods and beverages) are associated with an increase in mass index body (BMI) in childhood. [Shloim et al 2015; Hurley et al 2011; Ventura and Birch 2008; Clark et al 2007; Russell et al 2016; Fraser et al 2011]</p> | <p>1. Parental awareness and recognition of hunger and satiety cues can lead to small improvements in babies' and children's diets, food preferences and eating behaviours, and can be protective against excessive weight gain. Responsive feeding. Grade B.</p> <p>2. Parental restriction of the child's food intake (when he seems to eat too much) or pressure from the child to eat (when he seems to eat too little) are counterproductive, as these coercive practices can lead to behaviour unhealthy eating and weight gain. Parent feeding practices and parenting style. Grade A.</p> |

Table S3d: Included SRs. Characteristics, Results, and Conclusions

| Systematic Review | Population and purpose of the SR | Results | Conclusions |
|-------------------|----------------------------------|---------|-------------|
|                   |                                  |         |             |

Spill et al. 2019 [13]

Population consisting of dyads *Parent-caregiver* and *infant-toddler*.

Purpose: know the relationship between the different nutrition practices (of control, constriction, restriction, monitoring, responsiveness, and non-responsiveness to the manifestations of hunger and satiety of the child) and the growth, size, and body composition of children.

Studies: controlled, randomized and non-randomized, prospective and retrospective observational studies, pre-post controlled studies, nested-case-case-control studies.

**Responsive feeding**

In the RCT by Daniels et al. there was a difference in weight results at 13.5 mo; however, there were no significant differences in weight gain indicators at 20 mo or 4.5 years of follow-up between the intervention and control groups. The remaining 2 controlled studies, 1 RCT (18) and 1 non-randomized controlled study (21), had limitations that made them less informative to answer the question of the systematic review.

Pressure to finish food at 3 mo of age was associated with lower WAZ and lower odds of WAZ> 90th percentile at 3, 6, 9, 12, and 18 mo of age (7). Pressure to eat was associated with a lower WLZ in children aged 6 to 30 mo (25) and pressure to eat at 1 year of age predicted a weight of less than 2 years (9).

Another study measured the "maternal response to food refusal," which refers to a mother responding to a baby refusing food by encouraging the baby to eat or by offering additional food (35). In this study, the "maternal response to food refusal" at 8 mo of age was significantly associated with less weight gain from birth to 12 mo of age (35). Three other studies, however, found no significant association between pressure to eat and the baby's weight after adjusting for initial weight.

Thompson et al. (7) found an association between the use of restriction at 3 mo and WLZ at 3, 6, 9, 12, and 18 mo of age. Dinkevich et al. (25) reported an association between restrictive feeding practices and WLZ in infants aged 6 to 30 mo. Using data from a cohort of participants, 2 studies evaluated maternal restriction at 1 year of age and weight outcomes at 3 years of age (10, 11). After adjusting for the initial weight, Taveras et al. (11) found an association between maternal restriction and an increased likelihood of having a BMIZ between the 85th and 95th percentiles, but Rifas-Shiman et al. (10) found no association between maternal restriction and an increased likelihood of having a BMIZ> 95th percentile. On the other hand, Farrow et al. (9) found that greater restriction was associated with lower standardized weight scores. Hittner et al. (28) found a significant interaction between maternal restriction and baby sex as a predictor of BMI change over time. For boys, greater restriction was associated with lower BMI, but for girls, greater restriction was associated with higher BMI (28). Gregory et al. (26) found no association between food restriction and the child's weight.

Worobey et al. (34) found that reactive feeding practices (being more sensitive to the baby's cues) were associated with less weight gain in the baby from 6 to 12 mo of age, but there was no association with weight gain. from 3 to 6 mo of age. The other 5 studies found no association between reactive feeding practices and the infant's weight, height, and / or head circumference (7, 27, 31-33).

Of the studies that found no association, 2 looked at the difference between feeding on the infant's demand versus feeding on a fixed schedule (27, 33). Morris et al. (32) found no association between on-demand feeding practices at 3 mo of age and the thickness of the skin folds of the triceps at 9 mo of age.

Thompson et al. (7) found no association between reactive feeding practices and WAZ or skin fold thickness using delayed models with measurements at 3, 6, 9, 12, and 18 mo of age. Finally, a study conducted in China, which included parents and grandparents as caregivers, found no association between reactive feeding practices and change in BMIZ from 12 to 18 mo of age in overweight children (31).

Three studies looked at feeding in the absence of hunger or using food to calm children (12, 32, 33). Stifter et al. (12) found that calming feeding was associated with greater weight gain from 6 to 18 mo of age based on observational measures, but found no association when using parental relationship measures. The other 2 studies found no association between using food to calm or eating in the absence of hunger with change in BMIZ (31) or skin fold thickness (32).

Two studies investigated indulgent feeding practices, practices that satisfy the baby and offer minimal structure (7, 24). Chaidez et al. (24) found an association between greater indulgent feeding practices and greater changes in WAZ e BMIZ (24), while Thompson et al. (7) found no relationship between indulgent nutrition and WAZ or skin thickness. Ma et al. (31) found that concern about children's food intake was associated with the change in BMIZ between 12 and 18 mo of age in overweight children.

Dinkevich et al. (25) found an association between mothers who were more concerned about their baby overeating and the likelihood of exhibiting restrictive eating behaviors and having a baby with a higher WLZ. Conversely, there was an association between mothers who were more concerned about their baby not eating and the likelihood of putting pressure on their babies to eat and having babies with a lower WLZ. Farrow et al. (8) found that there was an interaction between maternal control; when maternal control was low or moderate, infants with slow weight gain from 0 to 6 mo tended to have accelerated weight gain from 6 to 12 mo, while infants with greater weight gain from 0 to 6 mo they had decelerated weight gain from 6 to 12 mo. When maternal control was high, the opposite was true.

Moderate evidence from intervention studies suggests that providing mothers with reactive feeding guidance to recognize and respond appropriately to the baby's hunger and satiety cues can lead to "normal" weight gain and / or state "normal" weight in babies from birth to 24 weeks compared to babies whose mothers did not receive guidance on reactive feeding. Moderate evidence from longitudinal cohort studies indicates an association between maternal feeding practices and infant weight status and / or weight gain, but the direction of effect has not been adequately studied. Restrictive feeding practices are associated with weight gain and increased weight status, while pressing feeding practices are associated with less weight gain and lower weight status - Evidence suggests that a mother's feeding practices are linked to concerns about her baby's body weight

|  |  |  |                                                                                                                                                                                                                                                                                                                                                                                                                                                                        |  |
|--|--|--|------------------------------------------------------------------------------------------------------------------------------------------------------------------------------------------------------------------------------------------------------------------------------------------------------------------------------------------------------------------------------------------------------------------------------------------------------------------------|--|
|  |  |  | <b>Other feeding practices</b> have not been associated with baby weight outcomes: monitoring (how much the mother tracks the amount of sweets, snacks, and high-fat foods her baby eats) (9), modeling (26 ), laissez-faire practices (7), and authoritative practices (offers structure, guidance, and positive modeling) (24). Because each of these feeding practices was only examined within a single study, consistency between studies could not be addressed. |  |
|--|--|--|------------------------------------------------------------------------------------------------------------------------------------------------------------------------------------------------------------------------------------------------------------------------------------------------------------------------------------------------------------------------------------------------------------------------------------------------------------------------|--|

Table S3e: Included studies. Characteristics and Results

| Study<br>(First Author,<br>year,<br>Country/Setting)                                       | Study design | Population<br>(sample size,<br>baseline<br>characteristics)                        | Intervention/exposure                                                                                                                                                                                                                                                                                                                                                                                                             | Primary<br>Outcome                                                                                                                 | Measure of<br>effects    | Secondary<br>Outcomes                      | Follow-up                                                                                                | Results                                                                                                                                                                           | Funding                                                                                                                                                                                                                                                                                                                                                                       |
|--------------------------------------------------------------------------------------------|--------------|------------------------------------------------------------------------------------|-----------------------------------------------------------------------------------------------------------------------------------------------------------------------------------------------------------------------------------------------------------------------------------------------------------------------------------------------------------------------------------------------------------------------------------|------------------------------------------------------------------------------------------------------------------------------------|--------------------------|--------------------------------------------|----------------------------------------------------------------------------------------------------------|-----------------------------------------------------------------------------------------------------------------------------------------------------------------------------------|-------------------------------------------------------------------------------------------------------------------------------------------------------------------------------------------------------------------------------------------------------------------------------------------------------------------------------------------------------------------------------|
| Daniels et al. 2012 [14]<br>Australia<br>Setting: recruited at 2 public maternity services | RCT in open  | 698 dyads from primiparous mothers, of healthy infants, from consecutive enrolment | <u>Intervention:</u> 2 modules, with multiple components including responsiveness education, started at the age of 4 and 7 mo and 13-16 mo respectively. Each module included 6 interactive group sessions lasting from 1 to 1.5 hours over 12 weeks, each module followed by 6 monthly contacts via SMS or email. Sessions facilitated by dietician and psychologist. Control: standard management at local territorial services | - BMIZ; WAZ; RWG (Rapid Weight Gain)<br>- Food preferences<br><br>- eating behaviour<br><br>- Style and eating behaviour practices | Difference in prevalence | Parental self-efficacy<br><br>Maternal BMI | At 13 mo of life<br>14% lost at follow-up<br>(significantly different socio-demographic characteristics) | Minor weight gain from 0 to 13 mo (OR = 1.6, 95% CI = 1.1 to 2.4; p = 0.008) and from 4 to 13 mo (OR = 1.5, 95% CI = 1.1 to 2.1; p = 0.014) in children of the intervention group | Australian National Health and Medical Research 440 Council (grant 426704). Additional funding was provided by HJ Heinz (post-doctoral 441 fellowship KM), Meat & Livestock Australia (MLA), Department of Health South Australia, 442 Food Standards Australia New Zealand (FSANZ), Queensland University of Technology, and 443 NHMRC Career Development Award 390136 (JMN) |

|                                                                                                                 |             |                                               |                                                                                                                                                                                                                                                                                                 |                      |                                                                                                    |                                                                                                                                                       |                                             |                                                                                                                                                                                                                                                                                                                             |                                                                                                                                                                                                                               |
|-----------------------------------------------------------------------------------------------------------------|-------------|-----------------------------------------------|-------------------------------------------------------------------------------------------------------------------------------------------------------------------------------------------------------------------------------------------------------------------------------------------------|----------------------|----------------------------------------------------------------------------------------------------|-------------------------------------------------------------------------------------------------------------------------------------------------------|---------------------------------------------|-----------------------------------------------------------------------------------------------------------------------------------------------------------------------------------------------------------------------------------------------------------------------------------------------------------------------------|-------------------------------------------------------------------------------------------------------------------------------------------------------------------------------------------------------------------------------|
| Savage et al. 2016 [15]<br><br>United States<br>Setting: maternity ward (Pennsylvania)                          | RCT in open | 291 primiparous mother / healthy infant dyads | The active group received 5 sessions (4 at home within 40 weeks and 1 in outpatient clinic at 1 year) consisting of intervention with multiple components including Responsibility Education. The control group received the same number of visits, with standard recommendations               | ΔBMIZ At 3 years old | The difference in Prevalence (of Overweight)<br><br>Mean difference (weight-for-length percentile) | For the 1-year-old analysis in this publication:<br>- WLZ<br>-% Overweight (WLZ ≥95th percentile) at 1 year                                           | At 1 year old<br><br>15% lost at follow-up  | The children in the group of parents who had received the surgery had a lower WLZ at 1 year of life (p = 0.04) and were less likely to be overweight than the children in the control group (p = 0.05)                                                                                                                      | National Institute of Diabetes and Digestive and Kidney Diseases. Additional support was received from the Children’s Miracle Network at Penn State Children’s Hospital.                                                      |
| Paul et al. 2018 [16] (follow-up of Savage 2016)<br><br>United States<br>Setting: maternity ward (Pennsylvania) | RCT in open | ΔBMIZ At 3 years old                          | The active group received 7 sessions (4 at home within 40 weeks and 3 in an outpatient clinic at 1, 2, and 3 years) consisting of intervention with multiple components including Responsibility Education. The control group received the same number of visits, with standard recommendations | ΔBMIZ At 3 years old | Mean difference                                                                                    | BMI z scores<br>Percentile BMI % with accelerated WG at various follow-up times<br><br>% Overweight and Obese at 2 and 3 years (WLZ ≥95th percentile) | At 3 years old<br><br>20% lost at follow-up | ΔBMIZ at 3 years: - 0.28 in the active group (95% CI -0.53 to -0.01; p = 0.04)<br><br>The differences in secondary outcomes related to growth were not significant 2-year BMIZ was -0.09 for the active group compared to 0.11 for the control group (ΔBMIZ absolute difference = - 0.21 [95% CI, -0.65 to 0.06]; p = 0.10) | National Institute of Diabetes and Digestive and Kidney Diseases and the National Institutes of Health/National Center For Advancing Translational Sciences; the Children’s Miracle Network at Penn State Children’s Hospital |

|                                               |              |                                          |                                                                   |                                             |                                                                              |                                                               |                                           |                                                                                                                                                                                                                                                                                                                                                                                         |                                                                                                                                                                                                                                                                                                                                                                                                                                                                                                                                                                                                                                                                      |
|-----------------------------------------------|--------------|------------------------------------------|-------------------------------------------------------------------|---------------------------------------------|------------------------------------------------------------------------------|---------------------------------------------------------------|-------------------------------------------|-----------------------------------------------------------------------------------------------------------------------------------------------------------------------------------------------------------------------------------------------------------------------------------------------------------------------------------------------------------------------------------------|----------------------------------------------------------------------------------------------------------------------------------------------------------------------------------------------------------------------------------------------------------------------------------------------------------------------------------------------------------------------------------------------------------------------------------------------------------------------------------------------------------------------------------------------------------------------------------------------------------------------------------------------------------------------|
| Wright et al. 2006 [17]<br><br>United Kingdom | Cohort study | Neonatal cohort (n = 1029)               | Pressure (Maternal response to food refusal)                      | Difference in prevalence (weight faltering) | Weight (measured by a nurse at 13 months). (Thrive Index)                    | Appetite, oromotor dysfunction, maternal anxiety during meals | 12 mo of life<br>Analysis on < 60%        | Less weight gain from birth to 12 mo in infants of mothers who exerted pressure at 12 mo in response to refusal of food (p = 0.002)                                                                                                                                                                                                                                                     | Sport Aiding Research in Kids (SPARKS), Henry Smith Charity                                                                                                                                                                                                                                                                                                                                                                                                                                                                                                                                                                                                          |
| Chaidez et al. 2014 [18]<br>United States     | Cohort study | 94 mothers of children aged 12-24 mo     | Indulgent<br><br>Authoritative                                    | 6 month change in z-scores                  | Weight for length Zscore (WLZ)<br>WAZ<br>BMIZ<br>Pesi misurati dal personale | /                                                             | 6 mo from the baseline<br>Analysis on 36% | “Lenient” practices associated with greater changes in parameters in the period from 22 mo to 28 mo<br>DWHZ: p = 0.03<br>DBAZ: p = 0.05<br>DWAZ: p = 0.04.                                                                                                                                                                                                                              | National Research Initiative of the CooperativeState Research, Education, and Extension Service, USDA; the University of California Institute for Mexico and the United States; the Western Center for Agricultural Health and Safety; and the Gustavus and Louise Pfeiffer Research Foundation                                                                                                                                                                                                                                                                                                                                                                      |
| Dinkevich et al. 2015 [19]<br>United States   | Cohort study | 231 children belonging to a local clinic | Restriction<br><br>Pressure<br><br>Concern about under/overweight | change in z-scores                          | Weight for length Z score (WLZ)                                              | /                                                             | At 30 mo of life<br>Analysis on 27%       | Positive association of restrictive feeding with higher WLZ from 6 to 30 mo of life (p = 0.036)<br>Association of Pressuring to Eat with lowest WLZ between 6 and 30 mo (p = 0.034)<br>Positive association between Concern for undereating and for Weight and greater WLZ (p = 0.011)<br>Concern style for overeating and for Weight significant predictor for weight gain (p = 0.008) | <u>Funding agencies:</u><br><b>Dr. Dinkevich</b> was supported by the Dean’s Research Initiative, SUNY-Downstate Medical Center, Brooklyn NY.<br><b>Dr. Ying Wei</b> is supported by Grant Number UL1 RR024156 from the National Center for Research Resources (NCRR) at National Institutes of Health (NIH).<br><b>Dr. Carnell</b> is supported by the National Institute of Diabetes and Digestive and Kidney Diseases (NIDDK) (Grant Number K99R00DK088360), and the Eunice Kennedy Shriver National Institute of Child Health and Human Development (NICHD) and Office of the Director, National Institutes of Health (OD) under Grant Number U54HD070725 to the |

|                                           |              |                                                                                        |                |                                                         |                                        |                                     |                                                                                                                                                                                                                                                                           |                                                                                                                                                                                                                                                                                                                                         |                                                           |
|-------------------------------------------|--------------|----------------------------------------------------------------------------------------|----------------|---------------------------------------------------------|----------------------------------------|-------------------------------------|---------------------------------------------------------------------------------------------------------------------------------------------------------------------------------------------------------------------------------------------------------------------------|-----------------------------------------------------------------------------------------------------------------------------------------------------------------------------------------------------------------------------------------------------------------------------------------------------------------------------------------|-----------------------------------------------------------|
|                                           |              |                                                                                        |                |                                                         |                                        |                                     |                                                                                                                                                                                                                                                                           |                                                                                                                                                                                                                                                                                                                                         | Global Obesity Prevention Center (GOPC) at Johns Hopkins. |
| Hittner et al. 2016 [20]<br>United States | Cohort study | Secondary analysis of a cohort study of 86 dyads (34% of a group of adoptive families) | Restriction    | BMI gain up to 6 years                                  | ΔBMI (including interactions with sex) | At 6 years old (% not explicated)   | Significant association between mothers restrictive style at 1 year and changes in BMI from 2 to 6 years of life; in males, restrictions of varying intensity were associated with a decrease in BMI between 2 and 6 years, in females with an increase in BMI (see text) | Multiple NIH grants; Spencer and William T. Grant Foundations; CRCW grant from the University of Colorado.                                                                                                                                                                                                                              |                                                           |
| Stifter et al. 2015 [21]<br>United States | Cohort study | Neonatal cohort 160 dyads                                                              | Food to Soothe | Weight gain from 6 to 12 months and from 6 to 18 months | Weight (measured by a nurse)           | At 18 mo of life<br>Analysis on 16% | Positive association between the use of food to calm the baby at 6 mo and weight gain between 6 and 18 mo (p <0.001)                                                                                                                                                      | Grants to the first author (National Institutes of Digestive Diseases and Kidney)<br>Grants to the second author (John T. Templeton Foundation and Agriculture and Food Research Initiative Grant no. 2011-67001-30117 from the USDA National Institute of Food and Agriculture, Childhood Obesity27 Prevention Challenge Area – A2121. |                                                           |

Commentato [MCV1]:

|                                                                                                                                                              |                                                                                                                                                                                                                                                                                                                                                                                 |
|--------------------------------------------------------------------------------------------------------------------------------------------------------------|---------------------------------------------------------------------------------------------------------------------------------------------------------------------------------------------------------------------------------------------------------------------------------------------------------------------------------------------------------------------------------|
| <p><i>E. Can RCF influence the development of overweight and obesity?</i></p> <p><i>F. Can NRCF influence the development of overweight and obesity?</i></p> | <p><b>E..</b><br/><b>P.</b> Healthy child aged 6-24 months<br/><b>I.</b> Responsive Complementary Feeding<br/><b>C.</b> Compared to other feeding models<br/><b>O.</b> Does it involve a different risk of developing overweight and obesity in later age?</p> <p><b>F.</b><br/><b>P.</b> Healthy child aged 6-24 months<br/><b>I.</b> Non-responsive Complementary Feeding</p> |
|--------------------------------------------------------------------------------------------------------------------------------------------------------------|---------------------------------------------------------------------------------------------------------------------------------------------------------------------------------------------------------------------------------------------------------------------------------------------------------------------------------------------------------------------------------|

|                                         |                                                                                                                               |
|-----------------------------------------|-------------------------------------------------------------------------------------------------------------------------------|
| RCF/NRCF Risk of overweight and obesity | C. Compared to other feeding models<br>O. Does it involve a different risk of developing overweight and obesity in later age? |
|                                         |                                                                                                                               |

Table S3f: Included SRs. Characteristics, Results, and Conclusions.

| Systematic Review      | Population and purpose of the SR                                                                                                                                                                                                                                                                                                                                                                                                                                                                                                                                                         | Results                                                                                                                                                                                                                                                                                                                                                                                                                                                                                                                                                                                                                                                                                                                                                                                                                                                                                                                                                                                                                                                                                                                                                                                                                          | Conclusions                                                                                                                                                                                                                                                                                                                                                                                                                                                                                                                                                                                                                                                                                                                                                                                                                                                                                                                               |
|------------------------|------------------------------------------------------------------------------------------------------------------------------------------------------------------------------------------------------------------------------------------------------------------------------------------------------------------------------------------------------------------------------------------------------------------------------------------------------------------------------------------------------------------------------------------------------------------------------------------|----------------------------------------------------------------------------------------------------------------------------------------------------------------------------------------------------------------------------------------------------------------------------------------------------------------------------------------------------------------------------------------------------------------------------------------------------------------------------------------------------------------------------------------------------------------------------------------------------------------------------------------------------------------------------------------------------------------------------------------------------------------------------------------------------------------------------------------------------------------------------------------------------------------------------------------------------------------------------------------------------------------------------------------------------------------------------------------------------------------------------------------------------------------------------------------------------------------------------------|-------------------------------------------------------------------------------------------------------------------------------------------------------------------------------------------------------------------------------------------------------------------------------------------------------------------------------------------------------------------------------------------------------------------------------------------------------------------------------------------------------------------------------------------------------------------------------------------------------------------------------------------------------------------------------------------------------------------------------------------------------------------------------------------------------------------------------------------------------------------------------------------------------------------------------------------|
| Spill et al. 2019 [13] | <p><u>Population</u> consisting of dyads <i>Parent-caregiver</i> and <i>infant-toddler</i>.</p> <p><u>Purpose</u>: know the relationship between the different nutrition practices (of control, constriction, restriction, monitoring, responsiveness and non-responsiveness to the manifestations of hunger and satiety of the child) and the growth, size, and body composition of children.</p> <p><u>Studies</u>: controlled, randomized and non-randomized, prospective and retrospective observational studies, pre-post controlled studies, nested-case-case-control studies.</p> | <p>Responsive feeding.</p> <p>In the RCT by Daniels et al. there was a difference in weight results at 13.5 mo; however, there were no significant differences in weight gain indicators at 20 mo or 4.5 years of follow-up between the intervention and control groups.</p> <p>The remaining 2 controlled studies, 1 RCT (Kavanagh 2008) and 1 non-randomized controlled study (De Carvalho M, 1983), had limitations that made them less informative to answer the question of the systematic review.</p> <p>Pressure to finish food at 3 mo of age was associated with lower WAZ and lower odds of WAZ&gt; 90th percentile at 3, 6, 9, 12, and 18 mo of age (Thompson, 2013). Pressure to eat was associated with a lower WLZ in children aged 6 to 30 mo (Dinkevich, 2015) and pressure to eat at 1 year of age predicted a weight of less than 2 years (Farrow, 2008) .</p> <p>After adjusting for the initial weight, Taveras et al. (Taveras 2006) found an association between maternal restriction and an increased likelihood of having a BMIZ between the 85th and 95th percentiles, but Rifas-Shiman et al. (Rifas-Shiman 2011) found no association between maternal restriction and an increased likelihood of</p> | <p>Moderate evidence from intervention studies suggests that providing mothers with responsive feeding guidance to recognize and respond appropriately to their baby's cues of hunger and satiety can lead to "normal" weight gain and / or health of "normal" weight in infants from birth to 24 mo compared to infants whose mothers did not receive responsive feeding guidance.</p> <p>Moderate evidence from longitudinal cohort studies indicates an association between maternal feeding practices and infant weight status and / or weight gain, but the direction of effect has not been adequately studied.</p> <p>Restrictive feeding practices are associated with weight gain and increased weight status, while pressing feeding practices are associated with less weight gain and lower weight status.</p> <p>Evidence suggests that a mother's feeding practices are linked to concerns about her baby's body weight</p> |



|  |  |                                                                                                                                                                                                                                                                                                                                                                                                                                                                                                                                                                                                                                                                                                                                                                                                                                                                                                                                                                                                                                                                                                                                                                                                                                                                                                                                                                                                                                                                                                                                                                                                                                                                                                                                                           |
|--|--|-----------------------------------------------------------------------------------------------------------------------------------------------------------------------------------------------------------------------------------------------------------------------------------------------------------------------------------------------------------------------------------------------------------------------------------------------------------------------------------------------------------------------------------------------------------------------------------------------------------------------------------------------------------------------------------------------------------------------------------------------------------------------------------------------------------------------------------------------------------------------------------------------------------------------------------------------------------------------------------------------------------------------------------------------------------------------------------------------------------------------------------------------------------------------------------------------------------------------------------------------------------------------------------------------------------------------------------------------------------------------------------------------------------------------------------------------------------------------------------------------------------------------------------------------------------------------------------------------------------------------------------------------------------------------------------------------------------------------------------------------------------|
|  |  | <p>having a BMIZ&gt; 95th percentile. On the other hand, Farrow et al. (Farrow, 2008) found that greater restriction was associated with lower standardized weight scores.</p> <p>Of the studies that found no association, 2 examined the difference between feeding on demand from the infant versus feeding on a fixed schedule (Gubbels 2011, Saxon 2002). Morris et al. (Morris 1982) found no association between on-demand feeding practices at 3 mo of age and the thickness of the skin folds of the triceps at 9 mo of age.</p> <p>Thompson et al. (Thompson, 2013) found no association between reactive feeding practices and WAZ or skin fold thickness using delayed models with measurements at 3, 6, 9, 12 and 18 mo of age.</p> <p>The other 2 studies found no association between or skinfold thickness (Morris 1982).</p> <p>Two studies investigated indulgent feeding practices that satisfy the child (Thompson, 2013, Chaidez 2014).</p> <p>Chaidez et al. found an association between greater indulgent feeding practices and greater changes in WAZ and BMIZ (Chaidez 2014), while Thompson et al. (Thompson, 2013) found no relationship between indulgent nutrition and WAZ or skin fold thickness.</p> <p>Other feeding practices have not been associated with baby weight outcomes: monitoring (how much the mother tracks the amount of sweets, snacks and high-fat foods her baby eats) (Farrow, 2009), modelling (Gregory, 2011), laissez-faire practices (Thompson, 2013), and authoritative practices (offers structure, guidance, and positive modelling) (Chaidez, 2014). Because each of these feeding practices was only examined within a single study, consistency between studies could not be addressed.</p> |
|--|--|-----------------------------------------------------------------------------------------------------------------------------------------------------------------------------------------------------------------------------------------------------------------------------------------------------------------------------------------------------------------------------------------------------------------------------------------------------------------------------------------------------------------------------------------------------------------------------------------------------------------------------------------------------------------------------------------------------------------------------------------------------------------------------------------------------------------------------------------------------------------------------------------------------------------------------------------------------------------------------------------------------------------------------------------------------------------------------------------------------------------------------------------------------------------------------------------------------------------------------------------------------------------------------------------------------------------------------------------------------------------------------------------------------------------------------------------------------------------------------------------------------------------------------------------------------------------------------------------------------------------------------------------------------------------------------------------------------------------------------------------------------------|

Table S3g: Included studies. Characteristics and Results

| Study<br>(First Author,<br>year,<br>Country/Setting)                                                | Study design | Population<br>(sample size,<br>baseline<br>characteristics)                                       | Intervention/exposure                                                                                                                                                                                                                                                                  | Primary Outcome                                                                                                                          | Measure of<br>effects       | Secondary<br>Outcomes                          | Follow-up                                                                                                                    | Results                                                                                                                                                                                | Funding                                                                                                                                                                                                                                                                          |
|-----------------------------------------------------------------------------------------------------|--------------|---------------------------------------------------------------------------------------------------|----------------------------------------------------------------------------------------------------------------------------------------------------------------------------------------------------------------------------------------------------------------------------------------|------------------------------------------------------------------------------------------------------------------------------------------|-----------------------------|------------------------------------------------|------------------------------------------------------------------------------------------------------------------------------|----------------------------------------------------------------------------------------------------------------------------------------------------------------------------------------|----------------------------------------------------------------------------------------------------------------------------------------------------------------------------------------------------------------------------------------------------------------------------------|
| Daniels et al. 2012<br>[14]<br>Australia<br>Setting: recruited<br>at 2 public<br>maternity services | RCT in open  | 698 dyads from<br>primiparous<br>mothers, of healthy<br>infants, from<br>consecutive<br>enrolment | <u>Intervention:</u> 2 modules,<br>with multiple components<br>including responsiveness<br>education, started at the<br>age of 4 and 7 mo and 13-<br>16 mo respectively. Each<br>module included 6<br>interactive group sessions<br>lasting from 1 to 1.5 hours<br>over 12 weeks, each | - BMIZ; WAZ; RWG<br>(Rapid Weight Gain)<br>- Food preferences<br><br>- eating behaviour<br><br>- Style and eating<br>behaviour practices | Difference in<br>prevalence | Parental self-<br>efficacy<br><br>Maternal BMI | At 13 mo of<br>life<br><br>14% lost at<br>follow-up<br>(significantly<br>different socio-<br>demographic<br>characteristics) | At 13 mo of age, the children in the<br>intervention group had a lower BMIz<br>score than the children in the control<br>group: 0.23 ± 0.93 and 0.42 ± 0.85<br>respectively (p = 0.01) | Australian National Health and Medical<br>Research 440 Council (grant 426704).<br>Additional funding was provided by HJ<br>Heinz<br>(post-doctoral 441 fellowship KM),<br>Meat<br>& Livestock Australia (MLA),<br>Department<br>of Health South Australia, 442 Food<br>Standards |

|                                                                                                                 |             |                                                        |                                                                                                                                                                                                                                                                                                              |                  |                                                                                                |                                                                                                                                                                          |                                                 |                                                                                                                                                                                                         |                                                                                                                                                                                                                               |
|-----------------------------------------------------------------------------------------------------------------|-------------|--------------------------------------------------------|--------------------------------------------------------------------------------------------------------------------------------------------------------------------------------------------------------------------------------------------------------------------------------------------------------------|------------------|------------------------------------------------------------------------------------------------|--------------------------------------------------------------------------------------------------------------------------------------------------------------------------|-------------------------------------------------|---------------------------------------------------------------------------------------------------------------------------------------------------------------------------------------------------------|-------------------------------------------------------------------------------------------------------------------------------------------------------------------------------------------------------------------------------|
|                                                                                                                 |             |                                                        | module followed by 6 monthly contacts via SMS or email. Sessions facilitated by dietician and psychologist.<br>Control: standard management at local territorial services                                                                                                                                    |                  |                                                                                                |                                                                                                                                                                          |                                                 |                                                                                                                                                                                                         | Australia New Zealand (FSANZ), Queensland<br>University of Technology, and 443 NHMRC Career Development Award 390136<br>(JMN)                                                                                                 |
| Savage et al. 2016 [15]<br><br>United States<br>Setting: maternity ward (Pennsylvania)                          | RCT in open | 291 dyads from primiparous mothers, of healthy infants | The active group received 5 sessions (4 at home within 40 weeks and 1 in outpatient clinic at 1 year) consisting of an intervention with multiple components including education a Responsiveness.<br><br>The control group received the same number of visits, with standard recommendations                | ΔBMIZ at 3 years | Difference in Prevalence (of Overweight)<br><br>Mean difference (weight-for-length percentile) | For 1-year-old analyses in this publication:<br><br>- WLZ<br>- % Overweight (WLZ ≥95th percentile) at 1 year                                                             | At 1 year of life<br><br>15% lost at follow-up  | The children in the group of parents who had received the surgery had a lower WLZ at 1 year of life (p = 0.04) and were less likely to be overweight than the children in the control group (p = 0.05). | National Institute of Diabetes and Digestive and Kidney Diseases. Additional support was received From the Children’s Miracle Network at Penn State Children’s Hospital.                                                      |
| Paul et al. 2018 [16] (follow-up of Savage 2016)<br><br>United States<br>Setting: maternity ward (Pennsylvania) | RCT in open |                                                        | The active group received 7 sessions (4 at home within 40 weeks and 3 in the outpatient clinic at 1, 2 and 3 years) consisting of an intervention with multiple components including education at Responsiveness.<br><br>The control group received the same number of visits, with standard recommendations | ΔBMIZ at 3 years | Mean difference                                                                                | - % Overweight and Obese at 2 and 3 years (WLZ ≥95th percentile)<br><br>- BMI z scores<br><br>- BMI percentile<br><br>- % with accelerated WG at various follow-up times | At 3 years of life<br><br>20% lost at follow-up | ΔBMIZ at 3 years: - 0.28 in the active group (95% CI -0.53 to -0.01; p = 0.04)<br><br>The differences for all secondary outcomes were not significant                                                   | National Institute of Diabetes and Digestive and Kidney Diseases and the National Institutes of Health/National Center For Advancing Translational Sciences; the Children’s Miracle Network at Penn State Children’s Hospital |

|                                                |                  |                                                                    |                                                                                                                                                                                                                                                  |                                                         |                                |                                                                 |                                    |                                                                                                                                                                           |                                                                                                                                                                                                                                                                                             |
|------------------------------------------------|------------------|--------------------------------------------------------------------|--------------------------------------------------------------------------------------------------------------------------------------------------------------------------------------------------------------------------------------------------|---------------------------------------------------------|--------------------------------|-----------------------------------------------------------------|------------------------------------|---------------------------------------------------------------------------------------------------------------------------------------------------------------------------|---------------------------------------------------------------------------------------------------------------------------------------------------------------------------------------------------------------------------------------------------------------------------------------------|
| Machuca et al. 2016 [44]<br>United States      | Controlled study | 187 children's dyads<br><br>Mothers chose which group to belong to | The children in the active group received 3 additional 2-hour group sessions with instructions on Responsive Feeding<br><br>The children in the active group received 3 additional 2-hour group sessions with instructions on Responsive Feeding | Overweight at 2 years (BMI ≥85 <sup>o</sup> percentile) | Odds Ratio (OR) for Overweight |                                                                 | The follow-up is not disclosed     | Less likely to be overweight in children in the active group (2.1% vs. 15.0%; p = 0.02; OR 0.12; 95% CI 0.02-0.94)                                                        | Not declared                                                                                                                                                                                                                                                                                |
| Rifas-Shiman et al. 2011 [45]<br>United States | Cohort study     | 1579 dyads enrolled before birth                                   | Restriction                                                                                                                                                                                                                                      | Obesity at 3 years (BMI ≥95 <sup>o</sup> percentile):   | Odds Ratio (OR) for Overweight | (Neonatal weight)<br><br>Subscapular folds<br><br>Triceps folds | Loss 47% at 3 years                | The use of a restrictive style at the age of one year was not significantly associated with a higher probability of obesity at 3 years after adjustment for WLZ at 1 year | US National Institutes of Health (NIH)<br><br>Contract funding from the Centers for Disease Control and Prevention                                                                                                                                                                          |
| Lumeng et al. 2012 [46]<br>United States       | Cohort study     | 1364 dyads (from a larger population study) enrolled from birth    | Pressure to eat                                                                                                                                                                                                                                  | BMIZ at 3 years                                         | Odds Ratio (OR) for Overweight | /                                                               | Loss 11% between 15 mo and 3 years | The use of a constricting style at the age of 15 mo was not significantly associated with a higher probability of obesity at 3 years after various adjustments            | Supported by the American Heart Association Midwest Affiliate Grantin-<br><br>Aid 0750206Z (to JCL) and NICHD 5K23HD054657 (to JCL).                                                                                                                                                        |
| Thompson et al. 2013 [47]<br>United States     | Cohort study     | 217 dyads enrolled at 3 mo                                         | <ul style="list-style-type: none"> <li>- Responsive</li> <li>- Restriction</li> <li>- Indulgent</li> <li>- Laissez-faire</li> <li>- Pressure to eat</li> </ul>                                                                                   | WAZ at 3, 6, 9, 12, 18 mo of life                       | WAZ Odds Ratio (OR)            | Skinfold thickness                                              | Loss36% at 18 mo                   | No significant association for all comparisons (for documented exposures ≥6 mo)                                                                                           | NIH/NICHD Grant 5-R01 HD042219-02 (PI: Bentley), the Interdisciplinary Obesity Training Center, UNCChapel Hill (NIH T32 MH075854), the Nutritional Epidemiology Core of the Clinical Nutrition Research Center at UNC (DK56350), and the Carolina Population Center (NICHD 5 R24 HD050924). |

BLW/BLISS and choking risk.

|                                                                                                                            |                                                                                                                                                                                                |
|----------------------------------------------------------------------------------------------------------------------------|------------------------------------------------------------------------------------------------------------------------------------------------------------------------------------------------|
| <i>G. Do the different caregivers’ feeding practices (CFPs) during the CF period result in different risks of choking?</i> | <b>P.</b> In a healthy baby aged 6-24 mo<br><b>I.</b> the Baby-Led Weaning (or BLISS method)<br><b>C.</b> compared to other feeding models<br><b>O.</b> result in a different risk of choking? |
|----------------------------------------------------------------------------------------------------------------------------|------------------------------------------------------------------------------------------------------------------------------------------------------------------------------------------------|

Table S3h: Included SRs. Characteristics, Results, and Conclusions.

| Systematic Review                                              | Population and purpose of the SR                                                                                                                                                                                        | Results                                                                                                                                                                 | Conclusions                                                                                                                 |
|----------------------------------------------------------------|-------------------------------------------------------------------------------------------------------------------------------------------------------------------------------------------------------------------------|-------------------------------------------------------------------------------------------------------------------------------------------------------------------------|-----------------------------------------------------------------------------------------------------------------------------|
| D’Auria et al. 2018 (SRs of RCT and observational studies) [1] | CF-age children fed using the BLW method compared with children fed using traditional methods.<br><br><u>Long-term health outcomes: risk of choking.</u><br>(auxological, metabolic parameters, relational indicators). | No significant differences in the risk of choking, in the 2 observational studies.<br><br>No significant difference in the randomized trial that used the BLISS method. | The methodological quality of the studies is poor and no firm conclusions can be drawn, despite the concordance of results. |

Table S3i: Included studies. Characteristics and Results.

| Study<br>(First Author,<br>year,<br>Country/Setting)         | Study design                                                                             | Population<br>(sample size,<br>baseline<br>characteristics)     | Intervention/exposure      | Primary Outcome                                                                             | Measure of<br>effects                                                   | Secondary<br>Outcomes                                                              | Follow-up                   | Results                                                                                                                              | Funding                                                                                                                                                                                                                     |
|--------------------------------------------------------------|------------------------------------------------------------------------------------------|-----------------------------------------------------------------|----------------------------|---------------------------------------------------------------------------------------------|-------------------------------------------------------------------------|------------------------------------------------------------------------------------|-----------------------------|--------------------------------------------------------------------------------------------------------------------------------------|-----------------------------------------------------------------------------------------------------------------------------------------------------------------------------------------------------------------------------|
| Kahraman et al.<br>2020 [8]<br><br>Turkey                    | Cross-<br>sectional<br>Data from a<br>self-completed<br>questionnaire                    | N = 526<br>age 18–24 mo                                         | BLW vs traditional CF      | Various effects of<br>weaning styles (one<br>of these is<br>“choking/aspiration”)           | Difference of<br>prevalence<br>(SD)                                     | /                                                                                  | 6-24 mo                     | No significant difference between<br>the groups in terms of<br>aspiration/choking situation<br>(p=0,855)                             | Undeclared                                                                                                                                                                                                                  |
| Dogan et al. 2018<br>(BLISS method)<br>[9]<br><br>Turkey     | Open RCT                                                                                 | 302 children aged<br>5-6 mo (156 BLISS,<br>146 traditional CF)  | BLISS vs traditional<br>CF | Incidence of choking                                                                        | Relative Risk<br>(RR)                                                   | Choking,<br>haematological<br>parameters,<br>and eating<br>behaviours, at<br>12 mo | 12 mo. of life<br>(N = 280) | No significant difference in the no.<br>of choking episodes.                                                                         | Undeclared                                                                                                                                                                                                                  |
| Fangupo et al.<br>2016 (BLISS<br>method) [54]<br>New Zealand | Open RCT                                                                                 | N = 206 healthy<br>women ((105<br>BLISS, 101<br>traditional CF) | BLISS vs traditional<br>CF | Incidence of choking                                                                        | Relative Risk<br>(RR)                                                   | Frequency of<br>choking<br>episodes.<br>Caloric and<br>micronutrient<br>intakes.   | 12 mo of<br>follow-up       | No significant difference in the no.<br>of choking episodes<br>-35% of children at least one<br>episode between 6 and 8 mo of<br>age | Lottery Health Research, Meat &<br>Livestock Australia, Karitane Products<br>Society, Perpetual Trustees, the New<br>Zealand Women’s Institute.<br>University of Otago with in-kind<br>contributions from Heinz Watties Ltd |
| Cameron et al.<br>2013 [55]<br>New Zealand                   | Cross-<br>sectional<br>study.<br><br>Data from a<br>self-<br>completed<br>questionnaire. | N = 199 mothers of<br>children aged 6-7<br>mo.                  | BLW vs traditional CF      | Dietary behaviors<br>and preferences<br><br>Frequency of<br>choking and gagging<br>episodes | Frequency<br>difference of<br>children with<br>at least one<br>episodes | /                                                                                  | /                           | No significant difference in<br>choking and "gagging" episodes<br>between groups.                                                    | No specific grant from any<br>funding agency                                                                                                                                                                                |
| Brown et al. 2017<br>[56]<br>United Kingdom                  | Cross-<br>sectional<br>study.<br><br>Data from a<br>self-<br>completed<br>questionnaire. | N = 1151 mothers<br>of children aged 4 -<br>12 mo.              | BLW vs traditional CF      | Frequency of<br>choking and gagging<br>episodes.                                            | Frequency<br>difference of<br>episodes                                  | /                                                                                  | /                           | No significant difference in<br>choking and "gagging" episodes<br>between groups.                                                    | No funding received                                                                                                                                                                                                         |
| Fu et al. 2018 [57]<br>New Zealand                           | Cross-<br>sectional<br>study.<br><br>Data from a<br>self-<br>completed<br>questionnaire. | From 6 to 36 mo.                                                | BLW vs traditional CF      | Frequency of "fussy<br>eating," weight,<br>choking risk.                                    | Frequency<br>difference of<br>episodes                                  | /                                                                                  | /                           | Frequency of choking ranges from<br>0% to 2% across groups, without<br>significance.                                                 | University of Otago departmental<br>funds                                                                                                                                                                                   |

## File S4. META-ANALYSIS

### 1. Growth and risk of overweight/obesity

#### Analysis 1.1. BLW: Growth (risk of poor growth/underweight).

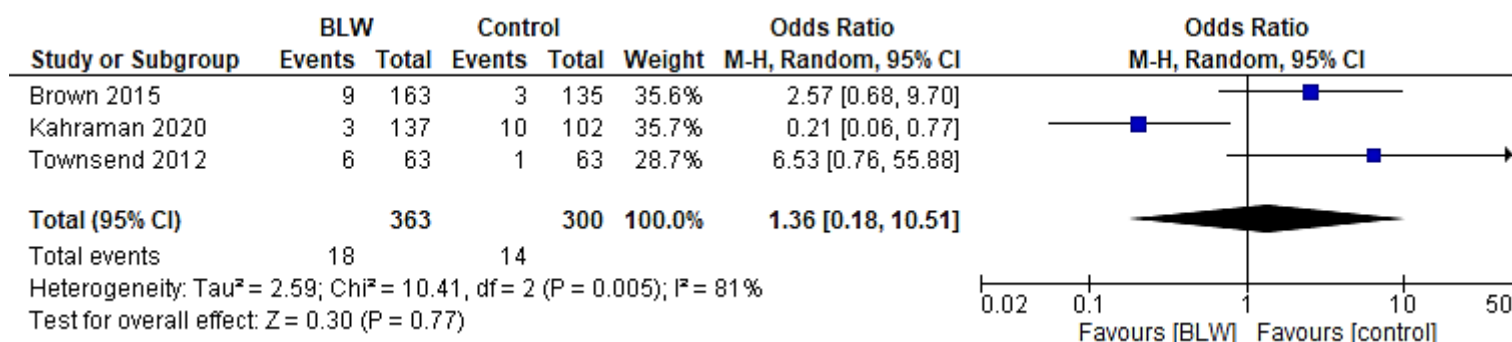

#### Analysis 1.2. BLW: risk of overweight/obesity.

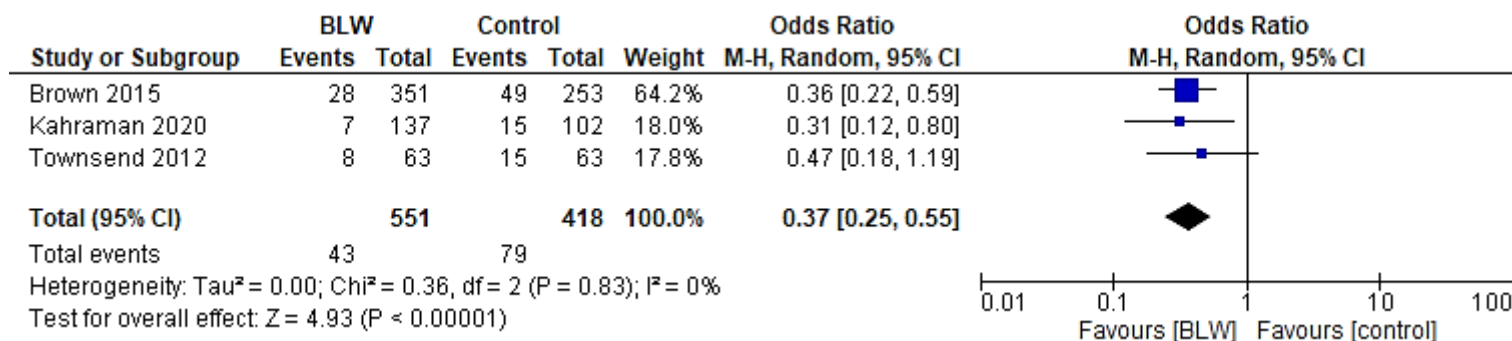

### Analysis 1.3 BLISS: risk of overweight/obesity.

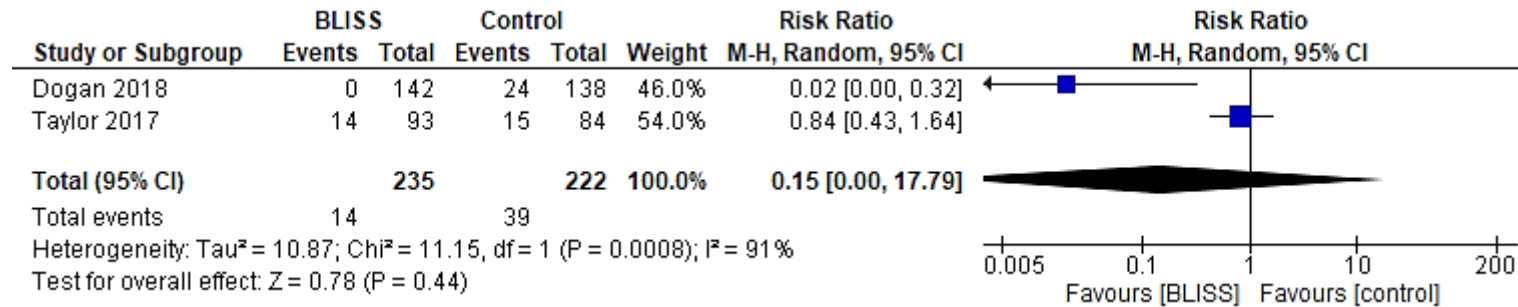

### Analysis 1.4 RCF: growth at 13 mo (BMIz)

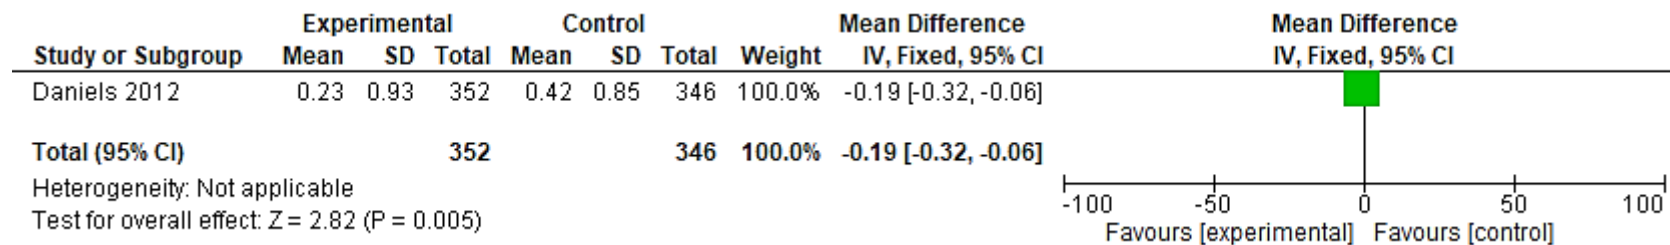

### Analysis 1.5 RCF: risk of overweight at 12 mo

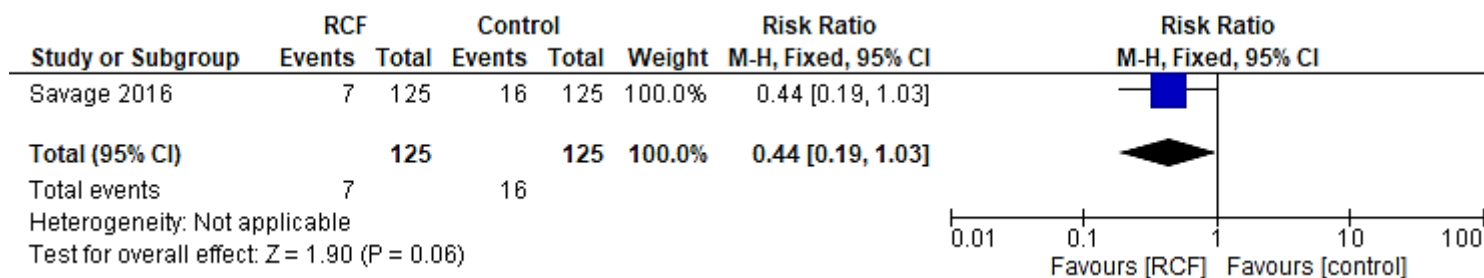

### Analysis 1.6 RCF: risk of overweight/obesity at 24-36 mo

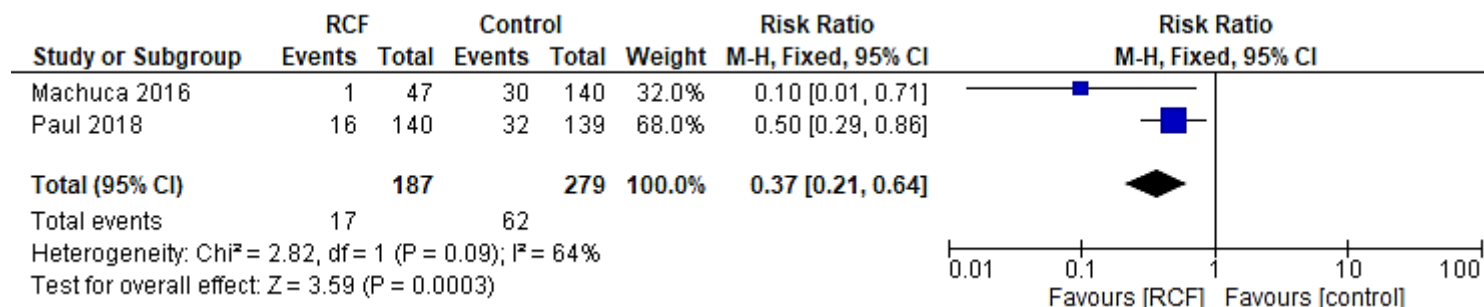



## 2. Risk of choking

### Analysis 2.1 BLISS: risk of choking

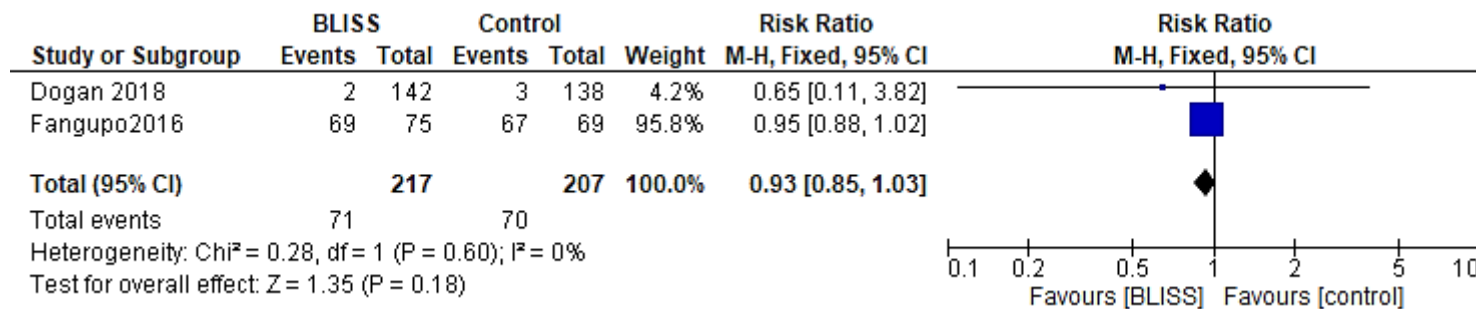

## File S5. SUMMARY OF FINDINGS FOR THE MAIN COMPARISONS

Table S5a: BLW/BLISS. Growth and risk of overweight/obesity

[BLW-BLISS] compared to [other models of CF] in [healthy child, can influence, either positively or negatively, infant weight-length gain]

**Patient or population:** [healthy child aged 6-24 months]

**Setting:** Outpatient

**Intervention:** [BLW-BLISS]

**Comparator:** [other models of CF]

| Outcomes                                                                                                                            | Anticipated absolute effects* (95% CI) |                                | Relative effect (95% CI)          | No of participants (studies)             | Certainty of the evidence (GRADE) | Comments |
|-------------------------------------------------------------------------------------------------------------------------------------|----------------------------------------|--------------------------------|-----------------------------------|------------------------------------------|-----------------------------------|----------|
|                                                                                                                                     | Risk with [BLW-BLISS]                  | Risk with [other models of CF] |                                   |                                          |                                   |          |
| Growth (BLW – observational studies) (follow up: interval 18 month at 78 month; evaluated with: BMI-BMI z score (% of underweight)) | <b>62 per 1.000</b><br>(9 to 340)      | 47 per 1.000                   | <b>OR 1.36</b><br>(0.18 to 10.51) | 663<br>(3 observational studies) [6,7,8] | ⊕○○○<br>Very low <sup>a</sup>     |          |

**Table S5a: BLW/BLISS. Growth and risk of overweight/obesity**

**[BLW-BLISS] compared to [other models of CF] in [healthy child, can influence, either positively or negatively, infant weight-length gain]**

**Patient or population:** [healthy child aged 6-24 months]

**Setting:** Outpatient

**Intervention:** [BLW-BLISS]

**Comparator:** [other models of CF]

| Outcomes                                                                                                  | Anticipated absolute effects* (95% CI)                                                                                                                                                                                                                                                                                                                            |                                | Relative effect (95% CI) | No of participants (studies) | Certainty of the evidence (GRADE) | Comments |
|-----------------------------------------------------------------------------------------------------------|-------------------------------------------------------------------------------------------------------------------------------------------------------------------------------------------------------------------------------------------------------------------------------------------------------------------------------------------------------------------|--------------------------------|--------------------------|------------------------------|-----------------------------------|----------|
|                                                                                                           | Risk with [BLW-BLISS]                                                                                                                                                                                                                                                                                                                                             | Risk with [other models of CF] |                          |                              |                                   |          |
| Growth (BLISS-RCT) (follow up: medium 24 months; evaluated with: (WHO P/L z-score = -2 SD) % underweight) | <p>Risultati discordati su misure d'esito diverse</p> <p><u>Dogan et al.</u> Weight at 12 months of age (kg) n=142 BLW = 10.4 +/- 0.9 n=138 Controlli = 11.1 +/- 0.5 t = 8.45 p &lt;0.001</p> <p><u>Taylor et al.</u> BMz-score a 12 mesi=84 control group, 0.20 [0.89]; n=94 BLISS group, 0.44 [1.13]; Main difference 0.21 (-0.07,+0.48). Non significativo</p> |                                |                          | 458<br>(2 RCTs) [9,10]       | ⊕⊕⊕○<br>Moderate <sup>b,c</sup>   |          |

Table S5a: BLW/BLISS. Growth and risk of overweight/obesity

[BLW-BLISS] compared to [other models of CF] in [healthy child, can influence, either positively or negatively, infant weight-length gain]

**Patient or population:** [healthy child aged 6-24 months]

**Setting:** Outpatient

**Intervention:** [BLW-BLISS]

**Comparator:** [other models of CF]

| Outcomes                                                                                                                                               | Anticipated absolute effects* (95% CI) |                                | Relative effect (95% CI)         | No of participants (studies)             | Certainty of the evidence (GRADE) | Comments |
|--------------------------------------------------------------------------------------------------------------------------------------------------------|----------------------------------------|--------------------------------|----------------------------------|------------------------------------------|-----------------------------------|----------|
|                                                                                                                                                        | Risk with [BLW-BLISS]                  | Risk with [other models of CF] |                                  |                                          |                                   |          |
| Overweight/obesity risk (BLW-observational studies) (follow up: interval 18 month to 78 month; evaluated with: BMI-BMI z-score (% obesity overweight)) | <b>388 per 1.000</b><br>(299 to 485)   | 189 per 1.000                  | <b>OR 0.37</b><br>(0.25 to 0.55) | 969<br>(3 observational studies) [6,7,8] | ⊕○○○<br>Very low <sup>a,b</sup>   |          |

Table S5a: BLW/BLISS. Growth and risk of overweight/obesity

[BLW-BLISS] compared to [other models of CF] in [healthy child, can influence, either positively or negatively, infant weight-length gain]

**Patient or population:** [healthy child aged 6-24 months]

**Setting:** Outpatient

**Intervention:** [BLW-BLISS]

**Comparator:** [other models of CF]

| Outcomes                                                                                                                              | Anticipated absolute effects* (95% CI) |                                     | Relative effect (95% CI)          | No of participants (studies) | Certainty of the evidence (GRADE) | Comments |
|---------------------------------------------------------------------------------------------------------------------------------------|----------------------------------------|-------------------------------------|-----------------------------------|------------------------------|-----------------------------------|----------|
|                                                                                                                                       | Risk with [BLW-BLISS]                  | Risk with [other models of CF]      |                                   |                              |                                   |          |
| Overweight/obesity risk (BLISS-RCT) (follow up: medium 24 months; evaluated with: WHO P/L z score/BMI z-score (% obesity overweight)) | 142 per 1.000                          | <b>17 per 1.000</b><br>(0 to 1.000) | <b>RR 0.15</b><br>(0.00 to 17.79) | 457<br>(2 RCTs) [9,10]       | ⊕⊕○○<br>Low <sup>b,d,e</sup>      |          |

\***The risk in the intervention group** (and its 95% confidence interval) is based on the assumed risk in the comparison group and the **relative effect** of the intervention (and its 95% CI).

**CI:** confidence interval; **MD:** mean difference; **OR:** odds ratio; **RR:** risk ratio

## Explanations

- a. Voluntary recruitment of mothers intending to use the BLW, uncertainty in weight measurement that was entrusted to parents with unspecified frequency, and significant loss of data during the observation period
- b. Loss at follow-up at 24 months = 21.4%, lack of blindness in patients and no ITT analysis
- c. Single RCT, possible beta error
- d. Low methodological quality for% loss at follow-up, lack of blindness, and no ITT analysis
- e. Discordant results, high heterogeneity

## RCF / NRCF. Growth

Table S5b: RCF. Growth.

[RCF] compared to [other models of CF] in [healthy child, in the period 6-24 months], can influence, either positively or negatively, [physical growth]

Patient or population [healthy child aged 6-24 months]

Setting: Outpatient

Intervention: [RCF]

Comparator: [other models of CF]

| Outcomes                                            | Anticipated absolute effects* (95% CI)                                                                                                                                                                                                                                                                                                                                                                                                                                                                                       |                 | Relative effect (95% CI) | No of participants (studies) | Certainty of the evidence (GRADE) | Comments |
|-----------------------------------------------------|------------------------------------------------------------------------------------------------------------------------------------------------------------------------------------------------------------------------------------------------------------------------------------------------------------------------------------------------------------------------------------------------------------------------------------------------------------------------------------------------------------------------------|-----------------|--------------------------|------------------------------|-----------------------------------|----------|
|                                                     | Risk with [other models of CF]                                                                                                                                                                                                                                                                                                                                                                                                                                                                                               | Risk with [RCF] |                          |                              |                                   |          |
| Growth 0-12 months. RCT (evaluated with: BMIZ, WLZ) | DANIELS 2012. The children in the intervention group had a lower BMIZ score at 13 months of age than the children in the control group: $0.23 \pm 0.93$ and $0.42 \pm 0.85$ ( $p = 0.01$ ) respectively, less weight gain from 0 to 13 months ( $OR = 1.6$ , $CI\ 95\% = 1.1$ to $2.4$ ; $p = 0.008$ ) and 4 to 13 months ( $OR = 1.5$ , $CI\ 95\% = 1.1$ to $2.1$ ; $p = 0.014$ ).<br><br>SAVAGE 2016. The children in the Parent Group who had received the intervention had, at 1 year of age, a lower WLZ ( $p = 0.04$ ) |                 |                          | 808<br>(2 RCTs) [14,15]      | ⊕⊕○○<br>Low <sup>a,b</sup>        |          |

Table S5b: RCF. Growth.

| [RCF] compared to [other models of CF] in [healthy child, in the period 6-24 months], can influence, either positively or negatively, [physical growth]                                         |                                        |                                                           |                          |                              |                                   |          |
|-------------------------------------------------------------------------------------------------------------------------------------------------------------------------------------------------|----------------------------------------|-----------------------------------------------------------|--------------------------|------------------------------|-----------------------------------|----------|
| Patient or population [healthy child aged 6-24 months]                                                                                                                                          |                                        |                                                           |                          |                              |                                   |          |
| Setting: Outpatient                                                                                                                                                                             |                                        |                                                           |                          |                              |                                   |          |
| Intervention: [RCF]                                                                                                                                                                             |                                        |                                                           |                          |                              |                                   |          |
| Comparator: [other models of CF]                                                                                                                                                                |                                        |                                                           |                          |                              |                                   |          |
| Outcomes                                                                                                                                                                                        | Anticipated absolute effects* (95% CI) |                                                           | Relative effect (95% CI) | No of participants (studies) | Certainty of the evidence (GRADE) | Comments |
|                                                                                                                                                                                                 | Risk with [other models of CF]         | Risk with [RCF]                                           |                          |                              |                                   |          |
| Growth. RCT (follow up: 3 years; evaluated with: ΔBMIZ)                                                                                                                                         | The mean growth. RCT. was 0 BMIZ       | <b>BMIZ MD = 0.19 lower</b><br>(0.32 lower to 0.06 lower) | -                        | 698<br>(1 RCT) [16]          | ⊕⊕○○<br>Low <sup>c,d</sup>        |          |
| *The risk in the intervention group (and its 95% confidence interval) is based on the assumed risk in the comparison group and the <b>relative effect</b> of the intervention (and its 95% CI). |                                        |                                                           |                          |                              |                                   |          |
| CI: confidence interval; MD: mean difference                                                                                                                                                    |                                        |                                                           |                          |                              |                                   |          |

## Explanations

a. Performance uncertainty (performance bias): the instructions provided to the caregivers of the active groups regarding ReCF were not the only dates, but were part of a multi-component intervention, with general instructions on the overall care of children; however, no instructions or information on nutritional aspects are described



- b. In the SLIMTIME study and in the INSIGHT study, the interventions were initiated in times prior to the period of the CF, thus determining a condition of poor inference (indirectness) since the effectiveness of the intervention may have been determined on a population that is not yet had reached the age of CF.
- c. Loss to follow-up limit (20%)
- d. Unique study

Table S5c: NRCF. Growth

[NRCF] compared to [other models of CF] in [healthy child, in the period 6-24 months, can influence, either positively or negatively,] [physical growth?]

Patient or population: [healthy child aged 6-24 months]

Setting: Outpatient

Intervention: [NRCF]

Comparator: [other models of CF]

| Outcomes                                                                                   | Impact                                                                                                                                                                                                                                                                                                                                                                                                                                                                                                                                                                                          | No of participants (studies)                  | Certainty of the evidence (GRADE) |
|--------------------------------------------------------------------------------------------|-------------------------------------------------------------------------------------------------------------------------------------------------------------------------------------------------------------------------------------------------------------------------------------------------------------------------------------------------------------------------------------------------------------------------------------------------------------------------------------------------------------------------------------------------------------------------------------------------|-----------------------------------------------|-----------------------------------|
| NRCF-Growth (follow up: interval 12 months to 6 years; evaluated with BMIZ, WLZ, ΔBMI, ΔP) | <p>Discordant data.</p> <p>In one study, “lenient” practices are associated with greater changes in parameters over the period from 22 months to 28 months</p> <p>DWHZ: p=0.03</p> <p>DBAZ: p=0.05</p> <p>DWAZ: p=0.04</p> <p>In another study Positive association of restrictive feeding with higher WLZ from 6 to 30 months of life (p = 0.036)</p> <p>Association of Pressuring to Eat with lowest WLZ between 6 and 30 months (p = 0.034)</p> <p>In another study, a significant association between mothers' restrictive style at 1 year and changes in BMI from 2 to 6 years of life</p> | (5 observational studies)<br>[17,18,19,20,21] | ⊕○○○<br>Very low <sup>a,b</sup>   |

## **Explanations**

- a. Discordant results
- b. Low sample size

## RCF/NRCF. Risk of overweight and obesity

Table S5d: RCF. Risk of overweight and obesity

| [RCF] compared to [other models of CF] in [healthy child, in the period 6-24 months], can influence [the development of overweight and obesity] |                                                                                                                                                                                        |                                |                                  |                             |                                   |          |
|-------------------------------------------------------------------------------------------------------------------------------------------------|----------------------------------------------------------------------------------------------------------------------------------------------------------------------------------------|--------------------------------|----------------------------------|-----------------------------|-----------------------------------|----------|
| Patient or population [healthy child aged 6-24 months]                                                                                          |                                                                                                                                                                                        |                                |                                  |                             |                                   |          |
| Setting: Outpatient                                                                                                                             |                                                                                                                                                                                        |                                |                                  |                             |                                   |          |
| Intervention: [RCF]                                                                                                                             |                                                                                                                                                                                        |                                |                                  |                             |                                   |          |
| Comparator: [other models of CF]                                                                                                                |                                                                                                                                                                                        |                                |                                  |                             |                                   |          |
| Outcomes                                                                                                                                        | Anticipated absolute effects* (95% CI)                                                                                                                                                 |                                | Relative effect (95% CI)         | № of participants (studies) | Certainty of the evidence (GRADE) | Comments |
|                                                                                                                                                 | Risk with [RCF]                                                                                                                                                                        | Risk with [other models of CF] |                                  |                             |                                   |          |
| Risk of overweight and obesity after 2 years. RCT (follow up: 3 years; assessed with: % of overweight/obesity children)                         | <b>76 /1.000</b><br>(44 to 132)                                                                                                                                                        | 185 /1.000                     | <b>RR 0.41</b><br>(0.24 to 0.71) | 478<br>(2 RCTs) [16,44]     | ⊕⊕⊕○<br>Moderate <sup>a,b,c</sup> |          |
| Risk of overweight and obesity after 13 mo. RCT (evaluated with BMIZ)                                                                           | DANIELS 2012. The children in the intervention group had a lower BMIZ score at 13 months of age than the children in the control group: 0.23±0.93 and 0.42±0.85 (p= 0.01) respectively |                                |                                  | 698<br>(1 RCTs) [14]        | ⊕⊕○○<br>Low <sup>d,e</sup>        |          |

---

[RCF] compared to [other models of CF] in [healthy child, in the period 6-24 months], can influence [the development of overweight and obesity]

---

**Patient or population** [healthy child aged 6-24 months]

**Setting:** Outpatient

**Intervention:** [RCF]

**Comparator:** [other models of CF]

| Outcomes | Anticipated absolute effects* (95% CI) |                                   | Relative effect<br>(95% CI) | № of participants<br>(studies) | Certainty of<br>the<br>evidence<br>(GRADE) | Comments |
|----------|----------------------------------------|-----------------------------------|-----------------------------|--------------------------------|--------------------------------------------|----------|
|          | Risk with [RCF]                        | Risk with [other<br>models of CF] |                             |                                |                                            |          |

\*The risk in the intervention group (and its 95% confidence interval) is based on the assumed risk in the comparison group and the **relative effect** of the intervention (and its 95% CI).

**CI:** confidence interval; **RR:** risk ratio

---

## Explanations

- a. Loss to follow-up limit (20%)
- b. 1 non-randomized study
- c. Unique study
- d. Performance uncertainty (performance bias): the instructions provided to the caregivers of the active groups regarding ReCF were not the only dates, but were part of a multi-component intervention, with general instructions on the overall care of children; however, no instructions or information on nutritional aspects are described
- e. The interventions were initiated in times prior to the period of the CF, thus determining a condition of poor inherence (indirectness) since the effectiveness of the intervention may have been determined on a population that is not yet had reached the age of CF.

**Table S5e: NRCF. Risk of overweight and obesity**

**[NRCF] compared to [other models of CF] in [healthy child, in the period 6-24 months], can influence, can influence [the development of overweight and obesity]**

**Patient or population** [healthy child aged 6-24 months]

**Setting:** Outpatient

**Intervention:** [NRCF]

**Comparator:** [other models of CF]

| Outcomes                                                                                                                                                     | Impact                                                                              | No of participants (studies)               | Certainty of the evidence (GRADE) |
|--------------------------------------------------------------------------------------------------------------------------------------------------------------|-------------------------------------------------------------------------------------|--------------------------------------------|-----------------------------------|
| NRCF. Risk of overweight and obesity. Observational (follow up: interval 15 months to 20 months; assessed with: % overweight/obesity. BMIZ, ΔBMI, Skinfold.) | No significant association for all comparisons (for documented exposures ≥6 months) | (4 observational studies)<br>[19,45,46,47] | ⊕○○○<br>Very low <sup>a,b,c</sup> |

### Explanations

a. Risk of bias in assessing exposure in 2 out of 3 studies

b. high loss at follow-up in 2 out of 3 studies

c. Different parental styles evaluated, for some unique study: Pressure to eat Responsive Restriction Indulgent Laissez-faire. However, the results are generally consistent

BLW/BLISS and choking risk.

[BLW/BLISS] compared to [Traditional CF] in [baby aged 6-24 months result in a different risk of choking]

Patient or population: [baby aged 6-24 months]

Setting: Outpatient

Intervention: [BLW/BLISS]

Comparator: [TCF]

Table S5f: BLW/BLISS and choking risk. RCT.

| Outcomes                                                                                                                | Anticipated absolute effects* (95% CI)                                                                        |                 | Relative effect (95% CI) | № of participants (studies)            | Certainty of the evidence (GRADE) | Comments |
|-------------------------------------------------------------------------------------------------------------------------|---------------------------------------------------------------------------------------------------------------|-----------------|--------------------------|----------------------------------------|-----------------------------------|----------|
|                                                                                                                         | Risk with [BLW/BLISS]                                                                                         | Risk with [TCF] |                          |                                        |                                   |          |
| BLW/BLISS. Choking risk. RCT (Follow up: interval 4 months to 12 months; assessed with: incidence of choking episodes). | 314/ 1.000 (287 to 348)                                                                                       | 338 /1.000      | RR 0.93 (0.85 to 1.03)   | 424 (2 RCTs) [9,54]                    | ⊕⊕⊕○ Moderate <sup>a,b,c</sup>    |          |
| BLW/BLISS. Choking risk. Observational studies.                                                                         | Low quality of evidence, however consistent results. even with RCTs. No statistically significant difference. |                 |                          | (4 observational studies) [8,55,56,57] | ⊕⊕○○ Low <sup>d</sup>             |          |

Explanations

- a. High risk of bias for follow-up losses: High risk (loss 14% and 21.5% at 12 and 24 months; ITT not performed) High (7.3% loss; non-ITT analysis).
- b. In Dogan 2018, choking is a secondary outcome.
- c. Number of events per sample very different in the 2 studies.
- d. Self-reported cases. Sample numbering not calculated, Lost to follow-up not described.



## Supplementary file. References

### BLW/BLISS, growth, and risk of overweight/obesity

1. D'Auria E, Bergamini M, Staiano A, et al.; Italian Society of Pediatrics. Baby-led weaning: what a systematic review of the literature adds on. *Ital J Pediatr*. 2018 May 3;44(1):49
2. Martínón-Torres N, Carreira N, Picáns-Leis R, Pérez-Ferreirós A, Kalén A, Leis R. Baby-Led Weaning: What Role Does It Play in Obesity Risk during the First Years? A Systematic Review. *Nutrients*. 2021 Mar 21;13(3):1009.
3. Harrison M, Brodribb W, Hepworth J. A qualitative systematic review of maternal infant feeding practices in transitioning from milk feeds to family foods. *Matern Child Nutr*. 2017 Apr;13(2):e12360.
4. Arikpo D, Edet ES, Chibuzor MT, Odey F, Caldwell DM. Educational interventions for improving primary caregiver complementary feeding practices for children aged 24 months and under. *Cochrane Database of Systematic Reviews* 2018, Issue 5. Art.No.: CD011768
5. Gomez M.S., Novaes A.P.T., da Silva J.P., Guerra L.M., de Fátima Possobon R. Baby-led weaning, an overview of the new approach to food introduction: Integrative literature review.. *Revista Paulista de Pediatria* 2020
6. Townsend E, et al. Baby knows best? The impact of weaning style on food preferences and body mass index in early childhood in a case-controlled sample. *BMJ OPEN* 2012;2:e000298.
7. Brown A, Lee DW, Early influences on child satiety-responsiveness: the role of weaning style. *Pediatr Obes*. 2015 Feb;10(1):57-66.
8. Kahraman, A.; Gümüş, M.; Yaz, S.B.; Basbakkal, Z. Baby-led weaning versus traditional weaning: The assessment of nutritional status in early childhood and maternal feeding practices in Turkey. *Early Child Dev. Care*. 2020, 190, 615–624.
9. Dogan E, Yilmaz G, Caylan N, et al. Baby-led complementary feeding: randomized controlled study. *Pediatr Int*. 2018;60(12):1073-1080.
10. Taylor RW, Williams SM, Fangupo LJ, et al. Effect of a baby-led approach to complementary feeding on infant growth and overweight: a randomized clinical trial. *JAMA Pediatr*. 2017;171:838-46.
11. Jones SW, Lee M, Brown A. Spoonfeeding is associated with increased infant weight but only amongst formula-fed infants. *Matern Child Nutr*. 2020 Jul;16(3):e12941

### RCE/NRCF and growth

12. Gerritsen S., Wall C. How We Eat – Reviews of the evidence on food and eating behaviours related to diet and body size. A report commissioned by the Ministry of Health. 31 May 2017. Available at <https://www.health.govt.nz/publication/how-we-eat-reviews-evidence-food-and-eating-behaviours-related-diet-and-body-size>
13. Spill MK, Callahan EH, Shapiro MJ, et al. Caregiver feeding practices and child weight outcomes: a systematic review. *Am J Clin Nutr*. 2019;109(Suppl.7):990S-1002S
14. Daniels LA, Mallan KM, Battistutta D, et al. Evaluation of an intervention to promote protective infant feeding practices to prevent childhood obesity: outcomes of the NOURISH RCT at 14 months of age and 6 months post the first of two intervention modules. *Int J Obes (Lond)*. 2012;36(10):1292-8
15. Savage JS, Birch LL, Marini M, Anzman-Frasca S, Paul IM. Effect of the INSIGHT responsive parenting intervention on rapid infant weight gain and overweight status at age 1 year: a randomized clinical trial. *JAMA Pediatr*. 2016;170(8):742-9
16. Paul IM, Savage JS, Anzman-Frasca S, et al. Effect of a Responsive Parenting Educational Intervention on Childhood Weight Outcomes at 3 Years of Age: The INSIGHT Randomized Clinical Trial. *JAMA*. 2018;320(5):461-8.

17. Wright CM, Parkinson KN, Drewett RF. How does maternal and child feeding behavior relate to weight gain and failure to thrive? Data from a prospective birth cohort. *Pediatrics*. 2006;117(4):1262-9
18. Chaidez V, McNiven S, Vosti SA, Kaiser LL. Sweetened food purchases and indulgent feeding are associated with increased toddler anthropometry. *J Nutr Educ Behav*. 2014;46(4):293-8
19. Dinkevich E, Leid L, Pryor K, et al. Mothers' feeding behaviors in infancy: do they predict child weight trajectories? *Obesity (Silver Spring)*. 2015;23(12):2470-6
20. Hittner JB, Johnson C, Tripicchio G, Faith MS. Infant emotional distress, maternal restriction at a home meal, and child BMI gain through age 6 years in the Colorado Adoption Project. *Eat Behav*. 2016;21:135-41
21. Stifter CA, Moding KJ. Understanding and measuring parent use of food to soothe infant and toddler distress: A longitudinal study from 6 to 18 months of age. *Appetite*. 2015;95:188-96
22. Paul IM, Savage JS, Anzman SL, et al. Preventing obesity during infancy: a pilot study. *Obesity (Silver Spring)*. 2011;19(2):353-61
23. Daniels LA, Mallan KM, Nicholson JM, Battistutta D, Magarey A. Outcomes of an early feeding practices intervention to prevent childhood obesity. *Pediatrics*. 2013;132(1):e109-18
24. Daniels LA, Mallan KM, Nicholson JM, et al. An early feeding practices intervention for obesity prevention. *Pediatrics*. 2015;136(1):e40-9
25. Worobey J, Lopez MI, Hoffman DJ. Maternal behavior and infant weight gain in the first year. *J Nutr Educ Behav*. 2009;41(3):169-75
26. Ma JQ, Zhou LL, Hu YQ, Liu SS, Sheng XY. Association between feeding practices and weight status in young children. *BMC Pediatr*. 2015;15:97
27. Shi C, Li N, Dong J, et al. Association between maternal nonresponsive feeding practice and child's eating behavior and weight status: children aged 1 to 6 years. *Eur J Pediatr*. 2017;176(12):1603-12

#### **RCF/NRCF and risk of overweight/obesity**

28. Canada's Dietary Guidelines for Health Professionals and Policy Makers. <https://food-guide.canada.ca/static/assets/pdf/CDG-EN-2018.pdf>
29. Dereñ K, Weghuber D, Caroli M, et al. Consumption of Sugar-Sweetened Beverages in Paediatric Age: A Position Paper of the European Academy of Paediatrics and the European Childhood Obesity Group. *Ann Nutr Metab*. 2019;74(4):296-302.
30. Fawcett M, Bronsky J, Campoy C, et al. Complementary Feeding: A Position Paper by the European Society for Paediatric Gastroenterology, Hepatology, and Nutrition (ESPGHAN). Committee on Nutrition. *J Pediatr Gastroenterol Nutr*. 2017 Jan;64(1):119-132
31. Guideline: Sugars intake for adults and children. Geneva: World Health Organization; 2015.
32. Koletzko B, Godfrey KM, Poston L, et al. Nutrition During Pregnancy, Lactation and Early Childhood and its Implications for Maternal and Long-Term Child Health: The Early Nutrition Project Recommendations. *Ann Nutr Metab*. 2019;74(2):93-106. doi:10.1159/000496471
33. NICE guideline 2015. Preventing excess weight gain. [nice.org.uk/guidance/ng7](http://nice.org.uk/guidance/ng7)
34. Romero-Velardea E, Villalpando-Carrión S, Pérez-Lizaur AB, et al. Consenso para las prácticas de alimentación complementaria en lactantes sanos. *Bol Med Hosp Infant Mex*. 2016;73(5):338---356
35. Schwarzenberg SJ, Georgieff MK, AAP Committee on Nutrition. Advocacy for Improving Nutrition in the First 1000 Days To Support Childhood Development and Adult Health. *Pediatrics*. 2018;141(2):e20173716  
U.S. Department of Health and Human Services and U.S. Department of Agriculture. 2015–2020 Dietary Guidelines for Americans. 8th Edition. December 2015. Available at <http://health.gov/dietaryguidelines/2015/guidelines/>.
36. Valerio G, Saggese G, Maffei C, et al. Diagnosi, trattamento e prevenzione dell'obesità del bambino e dell'adolescente. [http://www.siedp.it/files/Doc.ConsensusObesita\\_2017.pdf](http://www.siedp.it/files/Doc.ConsensusObesita_2017.pdf)
37. Heyman MB, Abrams SA, AAP Section on Gastroenterology, Hepatology, and Nutrition, AAP Committee on Nutrition. Fruit Juice in Infants, Children, and Adolescents: Current Recommendations. *Pediatrics*. 2017;139(6):e20170967

38. Redsell SA, Edmonds B, Swift JA, et al. Systematic review of randomised controlled trials of interventions that aim to reduce the risk, either directly or indirectly, of overweight and obesity in infancy and early childhood. *Matern Child Nutr.* 2016 Jan;12(1):24-38
39. Sokol RL, Qin B, Poti JM. Parenting styles and body mass index: a systematic review of prospective studies among children. *Obes Rev.* 2017 Mar;18(3):281-292.
40. Matvienko-Sikar K, Toomey E, Delaney L, et al.; Choosing Healthy Eating for Infant Health (CHERISH) study team. Effects of healthcare professional delivered early feeding interventions on feeding practices and dietary intake: A systematic review. *Appetite.* 2018 Apr 1;123:56-71.
41. Blake-Lamb TL, Locks LM, Perkins ME, Woo Baidal JA, Cheng ER, Taveras EM. Interventions for Childhood Obesity in the First 1,000 Days A Systematic Review. *Am J Prev Med.* 2016 Jun;50(6):780-789.
42. Bonilla C, Híjar G, Márquez D, Aramburú A, Aparco JP, Gutiérrez EL. Intervenciones para prevenir la aparición de sobrepeso y obesidad en niños menores de cinco años [Interventions to prevent the development of overweight and obesity in children younger than five years]. *Rev Peru Med Exp Salud Publica.* 2017 Oct-Dec;34(4):682-689. Spanish.
43. Woo Baidal JA, Locks LM, Cheng ER, Blake-Lamb TL, Perkins ME, Taveras EM. Risk Factors for Childhood Obesity in the First 1,000 Days: A Systematic Review. *Am J Prev Med.* 2016 Jun;50(6):761-779.
44. Machuca H, Arevalo S, Hackley B, et al. Well Baby Group Care: Evaluation of a Promising Intervention for Primary Obesity Prevention in Toddlers. *Child Obes.* 2016;12(3):171-8
45. Rifas-Shiman SL, Sherry B, Scanlon K, et al. Does maternal feeding restriction lead to childhood obesity in a prospective cohort study? *Arch Dis Child.* 2011;96(3):265-9
46. Lumeng JC, Ozbeki TN, Appugliese DP, Kaciroti N, Corwyn RF, Bradley RH. Observed assertive and intrusive maternal feeding behaviors increase child adiposity. *Am J Clin Nutr.* 2012 Mar;95(3):640-7.
47. Thompson AL, Adair LS, Bentley ME. Pressuring and restrictive feeding styles influence infant feeding and size among a low-income African-American sample. *Obesity (Silver Spring).* 2013;21(3):562-71
48. Morandi A, Tommasi M, Soffiati F, et al. Prevention of obesity in toddlers (PROBIT): a randomised clinical trial of responsive feeding promotion from birth to 24 months. *Int J Obes (Lond).* 2019 Jul 3.
49. Farrow C, Blissett J. Does maternal control during feeding moderate early infant weight gain? *Pediatrics.* 2006;118(2):e293-8
50. Gregory JE, Paxton SJ, Brozovic AM. Maternal feeding practices predict fruit and vegetable consumption in young children. Results of a 12-month longitudinal study. *Appetite.* 2011 Aug;57(1):167-72.
51. Schroeder, N., Rushovich, B., Bartlett, E, et al. (2015). Early obesity prevention: A randomized trial of a practice-based intervention in 0-24-month infants. *Journal of Obesity*, 2015.
52. Hohman EE, Paul IM, Birch LL, et al. INSIGHT responsive parenting intervention is associated with healthier patterns of dietary exposures in infants. *Obesity (Silver Spring).* 2017 Jan;25(1):185-191.
53. Agras WS, Hammer LD, McNicholas F, Kraemer HC. Risk factors for childhood overweight: a prospective study from birth to 9.5 years. *The Journal of pediatrics.* 2004, 145(1):20–25.

### **BLW/BLISS and choking risk**

54. Fangupo LJ, Heath AM, Williams SM, Erickson Williams LW, Morison BJ, Fleming EA, Taylor BJ, Wheeler BJ, Taylor RW. A Baby-Led Approach to Eating Solids and Risk of Choking. *Pediatrics.* 2016 Oct;138(4):e20160772.

55. Cameron SL, Taylor RW, Heath AL. Parent-led or baby-led? Association between complementary feeding practices and health-related behaviours in a survey of New Zealand families. *BMJ Open*. 2013;3:e003946
56. Brown A. No difference in self-reported frequency of choking between infants introduced to solid foods using a baby-led weaning or traditional spoon-feeding approach. *J Hum Nutr Diet*. 2017.
57. Fu X., Conlon C.A., Haszard J.J., Beck K.L., von Hurst P.R., Taylor R.W. & Heath A.-L.M., Food fussiness and early feeding characteristics of infants following Baby-Led Weaning and traditional spoon-feeding in New Zealand: An internet survey, *Appetite* (2018).
58. Özyüksel G, Soyer T, Üzümcügil F, Yalçın Ş, Ekinçi S, Karnak I, Çiftçi A.Ö, Tanyel F.C. Foreign Body Aspiration in Infants: Role of Self-Feeding. *Pediatric Allergy Immunology and Pulmonology* (2019) 32:2 (52-55).

**RCF/NRCF and T2D risk.**

None

**RCF/NRCF and hypertension risk.**

None

**RCF/NRCF and caries risk.**

59. Leong PM, Gussy MG, Barrow SY, de Silva-Sanigorski A, Waters E. A systematic review of risk factors during first year of life for early childhood caries. *Int*
